# Supplementary material for: DNA methylation may affect beef tenderness through signal transduction in Bos indicus
Source: Epigenetics Chromatin. 2022 May 13;15:15. doi: 10.1186/s13072-022-00449-4 (PMC9107245; doi:10.1186/s13072-022-00449-4)
Supplement: Supplementary file 2 — Additional file 2. Supplementary Tables S1–S10. [file 13072_2022_449_MOESM2_ESM.xlsx]

## Sheet: Table S1
DNA methylation may affect beef tenderness through signal transduction in Bos indicus
Table S1. Group, estimated breeding value (EBVSF) of SF values, EBVSF group average, shear force (kgf/cm2), and shear force average (kgf/cm2) at seven days of aging.
Group*	Sample	EBVSF	EBVSF average	Shear Force	Shear Force average
Tough	H01	0.84	0.64	8.2	7.72
	H02	0.73		6.94
	H03	0.73		9.04
	H04	0.55		6.54
	H05	0.54		8.54
	H06	0.5		7.07
Tender	L07	-1.15	-0.82	2.32	3.01
	L08	-1.12		3.1
	L09	-0.74		3.81
	L10	-0.69		3.04
	L11	-0.68		3.09
	L12	-0.58		2.71
*Tough = high shear force group, Tender = low shear force group

## Sheet: Table S2
DNA methylation may affect beef tenderness through signal transduction in Bos indicus
Table S2. Mapping statistics of 12 samples with extreme estimated breeding value (EBV) shear force values at 7 days of aging.
Sample	Total reads analyzed	Uniquely aligned reads	Mapping efficiency (%)	Methylated Spike-In	Unmethylated Spike-In
H01	53613836	25650212	47.8	1,58	99,42
H02	41603650	20208137	48.6	1,6	99,77
H03	55218358	23672121	42.9	1,57	99,37
H04	35292979	17674348	50.1	1,48	99,34
H05	48762688	22969434	47.1	1,65	99,71
H06	29843940	15333140	51.4	1,7	99,68
L07	50685544	21902215	43.2	1,57	99,41
L08	41838955	18172786	43.4	1,59	99,71
L09	42073996	19930236	47.4	1,58	99,41
L10	34248532	17000375	49.6	1,5	99,42
L11	54613381	26603904	48.7	1,83	99,69
L12	41688510	19975295	47.9	1,71	99,41

## Sheet: Table S3
DNA methylation may affect beef tenderness through signal transduction in Bos indicus
Table S3. Cytosine methylation profile of adult Nelore muscle, considering 12 samples.
Samples	Total cytosines analyzed	Total analyzed CpG*	% analyzed CpGs	Methylated CpG*	% CpG methylated	Unmethylated CpG*
H01	342173158	79275946	23.1684	29399026	37.0844	49876920
H02	268663823	62091434	23.1112	23309528	37.5407	38781906
H03	313818407	71640870	22.8288	28189876	39.3489	43450994
H04	234175461	52999105	22.6322	21041581	39.7018	31957524
H05	302180657	69383108	22.9608	27260702	39.2901	42122406
H06	203419337	47929068	23.5617	16970864	35.4083	30958204
L07	290716536	66858626	22.9979	28095142	42.0217	38763484
L08	242889930	55640091	22.9075	23105777	41.5272	32534314
L09	263891134	60194949	22.8105	23578221	39.1698	36616728
L10	225894790	53170273	23.5376	20226008	38.0401	32944265
L11	353581059	81705690	23.1081	34066392	41.694	47639298
L12	263490475	59762161	22.681	23895603	39.9845	35866558
*CpG = dinucleotide of cytosine followed by guanine.

## Sheet: Table S4
DNA methylation may affect beef tenderness through signal transduction in Bos indicus
Table S4. Description of differentially methylated CpG (DMC) including DMC ID, location, DMR overllaped, region type overlapped according to RefSeq (intergenic, exon, intron, promoter), strand of the DMC, statistics from differential methylation analysis (p-value, q-value, percent of difference between groups and status) and wether the DMC overlaps CpG island (CpGi), shore regions or other type o…
DMC	Location	DMR-overlapped	DMC.overlap(Refseq)	DMC.strand.	pvalue	qvalue	meth.diff	status-meth(Tender)	CpGisland	Closest-gene	ENSEMBLid	closest_gene_distance	QTL-Nelore	QTL-other**
7	1:113319477..113319477		intergenic	-	2.5e-06	0.00933597	53.4589	hypermethylated	other	DHX36	ENSBTAG00000006142	-7139
8	1:153993427..153993427		intergenic	-	1.15e-06	0.00618436	-31.746	hypomethylated	other	PLCL2	ENSBTAG00000009942	111331		Shear force
9	1:154513568..154513568		intron	-	5.75e-05	0.04447	39.3074	hypermethylated	other	TBC1D5	ENSBTAG00000030581	103021
1	1:594274..594274		intergenic	-	1.07e-05	0.0200889	25.8483	hypermethylated	CpGi	LOC618212		114908
4	1:60595399..60595399		intergenic	+	2.94e-05	0.0322479	-39.2299	hypomethylated	other	LSAMP	ENSBTAG00000049383	-596923
2	1:6270674..6270674	DMR1	intron	+	1.42e-05	0.0227981	25.6533	hypermethylated	other	GRIK1	ENSBTAG00000034854	158540
3	1:6297762..6297762		intron	+	2.94e-05	0.0322479	31.0044	hypermethylated	other	GRIK1	ENSBTAG00000034854	185628
5	1:95385095..95385095	DMR2	intron	-	3.92e-08	0.00108403	35.0547	hypermethylated	other	FNDC3B	ENSBTAG00000019376	21404
6	1:99906405..99906405	DMR3	intron	+	5.62e-06	0.0137187	30.2525	hypermethylated	other	WDR49	ENSBTAG00000031618	83291
10	10:71897157..71897157		intergenic	+	1.34e-07	0.00166399	25.5845	hypermethylated	other	RTN1	ENSBTAG00000011451	757
16	11:101189744..101189744		intergenic	-	5.82e-05	0.044802	-31.2865	hypomethylated	other	FIBCD1	ENSBTAG00000017982	-10609
17	11:103817425..103817425		intergenic	-	5.18e-05	0.0416887	25.8932	hypermethylated	other	DNLZ/GPSM1	ENSBTAG00000012880/ENSBTAG00000018799	6480
18	11:105132017..105132017	DMR16	exon	-	6.97e-05	0.0488728	25.0357	hypermethylated	CpGi	LOC104973519		7450
19	11:105931441..105931441		exon	+	2.24e-06	0.00877737	30.3447	hypermethylated	CpGi	AJM1	ENSBTAG00000039708	1980
11	11:13442364..13442364		intergenic	+	8.44e-08	0.0013789	-25.3806	hypomethylated	CpGi	ANKRD53	ENSBTAG00000010623	728	WBSF7; WHC
12	11:29540007..29540007		intergenic	+	6.24e-14	1.9e-08	44.6481	hypermethylated	other	STPG4		38317	WBSF7; WHC
13	11:37097825..37097825	DMR15	intergenic	-	1.31e-07	0.00165666	29.7947	hypermethylated	other	LOC112448872	ENSBTAG00000051714	2026
14	11:97832549..97832549		intergenic	-	6.75e-06	0.0151536	31.0087	hypermethylated	other	RALGPS1	ENSBTAG00000011810	25782
15	11:99076780..99076780		intron	+	4.42e-05	0.0386119	40.7591	hypermethylated	other	GLE1	ENSBTAG00000030566	11017
20	12:19181256..19181256		intergenic	-	3.37e-05	0.0340716	-29.0541	hypomethylated	CpGi	ARL11	ENSBTAG00000016998	1437
21	12:30851251..30851251		intergenic	-	8.78e-06	0.0179064	-36.5217	hypomethylated	other	UBL3	ENSBTAG00000012170	45022
22	13:19739401..19739401	DMR18	intron	+	4.45e-06	0.012145	33.877	hypermethylated	other	NRP1	ENSBTAG00000019866	104077	WBSF7; WHC
23	13:57484992..57484992	DMR20	promoter; intron	-	1.59e-05	0.0239825	31.7757	hypermethylated	CpGi	GNAS	ENSBTAG00000052413	-979
24	13:57570385..57570385	DMR21	intergenic	+	4.81e-05	0.04029	28.2516	hypermethylated	other	bta-mir-296		19461
25	13:58507464..58507464		intergenic	-	1.79e-05	0.0252702	29.0402	hypermethylated	other	PMEPA1	ENSBTAG00000054628	19643
26	13:78278046..78278046		intergenic	-	4.48e-07	0.00368698	-43.8826	hypomethylated	other	LOC100847835		41625
27	13:78383223..78383223		intergenic	-	1.89e-05	0.0256762	-30.3895	hypomethylated	other	LOC112449348		-11202
30	14:12585617..12585617		intergenic	+	6.09e-05	0.0455966	-31.8145	hypomethylated	other	MYC	ENSBTAG00000008409	70980
31	14:16372832..16372832	DMR22	intergenic	-	5.42e-06	0.0134048	26.2149	hypermethylated	other	FBXO32	ENSBTAG00000016194	66640
29	14:1674753..1674753		exon	+	6.02e-05	0.045577	26.4349	hypermethylated	other	LYNX1	ENSBTAG00000005762	4842
32	14:35169326..35169326		intergenic	+	5.66e-05	0.0439831	25.4585	hypermethylated	CpGi	EYA1	ENSBTAG00000011298	-9389	LMUSCLE
33	14:35446482..35446482		intergenic	-	7.27e-08	0.0013789	26.3636	hypermethylated	CpGi	LOC101903752		4379	LMUSCLE
34	14:61865585..61865585	DMR23	intergenic	-	5.93e-05	0.0452753	34.2972	hypermethylated	other	LOC112449534		-3102
35	14:65310535..65310535		intergenic	+	4.04e-06	0.0115521	26.4274	hypermethylated	CpGi	LOC112449632		5643
28	14:774091..774091		intergenic	-	4.65e-08	0.00117891	35.2388	hypermethylated	CpGi	SMPD5/OPLAH	ENSBTAG00000015040/ENSBTAG00000017281	3366
36	15:44182487..44182487		intergenic	-	2.31e-06	0.00877737	26.2406	hypermethylated	other	LMO1	ENSBTAG00000016320	-98795
37	16:2735632..2735632		intergenic	-	4.64e-05	0.0395509	33.858	hypermethylated	other	NFASC	ENSBTAG00000045895	130135
38	16:51010828..51010828		exon	-	4.34e-05	0.0383256	31.0125	hypermethylated	shore	MIB2	ENSBTAG00000010720	3188
39	16:78886584..78886584	DMR25	intergenic	-	7.44e-08	0.0013789	25.8569	hypermethylated	CpGi	NR5A2	ENSBTAG00000009265	41638
40	16:80061957..80061957		intron	+	5.15e-06	0.0130693	32.3099	hypermethylated	shore	SYT2	ENSBTAG00000047648	-9307	WBSF0; WBSF7
41	16:80315014..80315014		intron	-	4.45e-06	0.012145	25.7827	hypermethylated	CpGi	UBE2T/LGR6	ENSBTAG00000004790/ENSBTAG00000004789	9913	WBSF0; WBSF7; WHC
42	17:55144519..55144519		intron	+	7.06e-06	0.0155133	28.596	hypermethylated	other	SH2B3	ENSBTAG00000009101	3757
43	17:64324392..64324392		intergenic	-	3.8e-05	0.0358478	-28.802	hypomethylated	other	TMEM119	ENSBTAG00000031849	-3434
44	18:12025812..12025812		intron	-	1.97e-05	0.0260597	-29.2603	hypomethylated	other	LOC112442266		35440
45	18:13773211..13773211		intron	+	8.94e-07	0.00531099	-32.5264	hypomethylated	shore	ZFPM1	ENSBTAG00000015766	47076
46	18:25004341..25004341		intergenic	-	3.43e-05	0.0340808	-29.5814	hypomethylated	other	NLRC5	ENSBTAG00000005413	-5458
47	18:25473399..25473399	DMR26	intron	+	1.11e-05	0.0201091	25.6356	hypermethylated	shore	DOK4	ENSBTAG00000001857	441
48	18:54339633..54339633		intron	+	4.77e-09	0.000263821	-32.381	hypomethylated	other	C5AR2	ENSBTAG00000037735	1819
49	18:55299264..55299264		promoter; exon	-	2.17e-05	0.0272768	41.1363	hypermethylated	other	NTN5	ENSBTAG00000044132	294
50	18:55373134..55373134		intergenic	+	2.55e-05	0.0303609	25.0138	hypermethylated	shore	RASIP1	ENSBTAG00000011619/	-428		Longissimus muscle area
51	18:55436914..55436914	DMR27	intergenic	+	7.1e-07	0.00464701	32.8648	hypermethylated	other	HSD17B14	ENSBTAG00000009174	10556		Longissimus muscle area
52	18:56248254..56248254		intergenic	+	7.03e-06	0.0155079	60.7376	hypermethylated	CpGi	IL4I1/NUP62	ENSBTAG00000005766/104968452	5032
53	18:56263782..56263782	DMR28	intergenic	+	2.3e-05	0.0282563	53.78	hypermethylated	other	ATF5/NUP62	ENSBTAG00000003457/104968452	-4540
54	18:65763739..65763739		intergenic	-	2.93e-05	0.0322479	-45.3947	hypomethylated	other	TRIM28/LOC112442228	ENSBTAG00000006422/	-5347
56	19:11686892..11686892		exon	-	1.09e-05	0.0201091	26.0741	hypermethylated	CpGi	TBX2	ENSBTAG00000014278	5686
57	19:35351196..35351196		intergenic	-	4e-06	0.0115476	26.7276	hypermethylated	other	KCNJ12	ENSBTAG00000020061	22545		Lignoceric acid content
58	19:38535048..38535048		intron	-	5.64e-05	0.043863	33.4522	hypermethylated	other	PNPO/SP2	ENSBTAG00000012259/ENSBTAG00000013740	-7751
59	19:53883287..53883287		intergenic	-	2.55e-05	0.0303609	31.3488	hypermethylated	other	LOC104975122		4250
60	19:57269983..57269983		intergenic	+	1.44e-09	0.000109543	-25.4207	hypomethylated	other	LOC101907074		63840
61	19:58586151..58586151		intergenic	-	2.72e-05	0.0311904	-27.08	hypomethylated	other	LOC101907523	ENSBTAG00000055157	-32209
62	19:60943077..60943077		intergenic	+	4.55e-05	0.0392141	-30.6561	hypomethylated	other	LOC112442736		43661
55	19:9256571..9256571		intron	-	8.19e-07	0.00503815	26.7258	hypermethylated	shore	MPO	ENSBTAG00000011616	2122
63	2:107414839..107414839		exon	+	2.09e-06	0.00866811	34.8337	hypermethylated	CpGi	SPEGNB/SPEG	/ENSBTAG00000046176	-8925
64	20:47436349..47436349	DMR30	intergenic	+	6.06e-07	0.00448845	-28.8684	hypomethylated	other	LOC104975285		279713
65	20:67487705..67487705	DMR31	intergenic	-	1.39e-05	0.0225618	27.4669	hypermethylated	other	ICE1		199127
66	21:10531212..10531212		intergenic	+	2.4e-05	0.0289247	31.5129	hypermethylated	CpGi	LOC101907944		-15287
67	21:21374323..21374323	DMR32	intergenic	+	1.99e-16	1.21e-10	46.9932	hypermethylated	other	ARPIN	ENSBTAG00000027059	20471
68	21:33163436..33163436		intergenic	+	4.44e-05	0.0386848	-38.8571	hypomethylated	other	ODF3L1	ENSBTAG00000019506	8242
69	21:69392202..69392202		intergenic	-	4.87e-05	0.0404743	26.1748	hypermethylated	shore	AHNAK2	ENSBTAG00000048906	-2387
70	21:69512647..69512647		intergenic	+	8.55e-06	0.0178277	-27.2111	hypomethylated	other	JAG2	ENSBTAG00000007319	14359
71	21:69707697..69707697		intergenic	-	3.21e-06	0.0102926	-29.3679	hypomethylated	CpGi	MTA1	ENSBTAG00000047606	688
72	21:69747631..69747631		exon	+	3.8e-05	0.0358478	26.7975	hypermethylated	CpGi	CRIP2	ENSBTAG00000051673	1336
73	22:58368268..58368268		intergenic	+	5.39e-06	0.0133874	28.5466	hypermethylated	shore	FBLN2	ENSBTAG00000004014	9259
74	22:58419862..58419862		intergenic	+	1.99e-05	0.0261125	36.0248	hypermethylated	other	FBLN2	ENSBTAG00000004014	-21579
75	23:19018120..19018120		intergenic	-	1.45e-07	0.00176352	28.9138	hypermethylated	other	LOC112443836		-58267	WBSF7
76	23:43203880..43203880	DMR34	intergenic	-	1.42e-08	0.000540963	-31.9812	hypomethylated	other	GFOD1		12994
79	24:3348223..3348223		intergenic	-	1.91e-09	0.000129159	50.4	hypermethylated	other	LOC112444190		113222
77	24:655824..655824		intergenic	+	1.76e-06	0.0078732	-25.0575	hypomethylated	shore	KCNG2	ENSBTAG00000013665	-19459
78	24:682420..682420		intergenic	+	1.06e-05	0.0200605	28.9742	hypermethylated	shore	CTDP1	ENSBTAG00000053484	29018
80	25:2597327..2597327		intergenic	+	3.07e-06	0.0102709	30.5709	hypermethylated	shore	caspase-14	ENSBTAG00000021407	14273		Marbling score
82	25:27006198..27006198		intergenic	-	4.36e-06	0.0120068	25.2668	hypermethylated	CpGi	LOC101902665	ENSBTAG00000040555	3292
83	25:27522280..27522280		intergenic	-	3.98e-05	0.036889	35.0258	hypermethylated	CpGi	SLC5A2	ENSBTAG00000010096	8286		Shear force
84	25:35910135..35910135		exon	-	6.36e-05	0.0466707	35.3008	hypermethylated	shore	GNB2	ENSBTAG00000006495	4912
81	25:3828157..3828157		exon; intron	+	1.8e-07	0.00203276	-28.8983	hypomethylated	other	C25H16orf71	ENSBTAG00000006595	7087
85	25:38895424..38895424	DMR37	intron	+	6.21e-08	0.0013789	-28.774	hypomethylated	other	TNRC18	ENSBTAG00000037400	9628
86	26:47379786..47379786		intron	+	4.22e-06	0.0118339	-26.3021	hypomethylated	shore	PTPRE	ENSBTAG00000002435	-15749
87	26:48397310..48397310		intergenic	+	2.82e-07	0.00263949	47.7686	hypermethylated	other	MGMT	ENSBTAG00000050386	-421359
88	26:49152976..49152976		intergenic	+	3.19e-06	0.0102926	32.8025	hypermethylated	shore	EBF3	ENSBTAG00000008272	118986
89	26:49275319..49275319	DMR40	intergenic	-	6.99e-05	0.0489441	27.1955	hypermethylated	CpGi	EBF3	ENSBTAG00000008272	-3355
90	26:49275340..49275340	DMR40	intergenic	-	1.59e-05	0.0239825	25.8979	hypermethylated	CpGi	EBF3	ENSBTAG00000008272	-3376
91	26:50914187..50914187		exon	+	6.12e-07	0.00448845	-43.7189	hypomethylated	CpGi	LOC112444507/CFAP46	/ENSBTAG00000015651	-1369
92	26:51777152..51777152		intergenic	-	4.23e-05	0.0378114	28.4911	hypermethylated	shore	JAKMIP3	ENSBTAG00000000951	58555
93	29:12328065..12328065		intergenic	+	4.63e-07	0.00375454	-28.6714	hypomethylated	other	CCDC90B	ENSBTAG00000007479	-56745
94	29:42954284..42954284		intron	-	6.71e-05	0.0477664	-25.8228	hypomethylated	CpGi	NRXN2	ENSBTAG00000000244	1434
95	29:49212824..49212824		intergenic	+	4.64e-06	0.0122403	27.731	hypermethylated	other	CD81	ENSBTAG00000047495	3989
99	3:107925468..107925468	DMR4	intergenic	+	7.8e-07	0.00496924	31.0345	hypermethylated	other	POU3F1	ENSBTAG00000012061	4740
100	3:108173427..108173427		intron	+	2.19e-06	0.00877737	-62.8712	hypomethylated	other	EPHA10	ENSBTAG00000020510	23717
101	3:119812617..119812617		intergenic	-	8.57e-08	0.0013789	38.3576	hypermethylated	shore	LOC112446049		-11731
96	3:14189366..14189366		exon	-	1.12e-05	0.0201091	30.5636	hypermethylated	shore	BCAN	ENSBTAG00000015789	5606
97	3:33622552..33622552		intergenic	-	6.07e-06	0.0143179	-29.2481	hypomethylated	other	EPS8L3	ENSBTAG00000001845	-12204
98	3:80580988..80580988		intron	+	3.76e-05	0.0356043	34.1935	hypermethylated	other	JAK1	ENSBTAG00000003147	136422
103	4:106188691..106188691		intron	-	2.02e-05	0.0263641	32.4214	hypermethylated	other	TRPV6	ENSBTAG00000024219	7272
104	4:118869670..118869670	DMR6	intergenic	+	6.72e-05	0.0477664	-34.1537	hypomethylated	other	PTPRN2	ENSBTAG00000004958	-460418
105	4:119075640..119075640		intron	-	5.89e-05	0.0450684	55.2636	hypermethylated	CpGi	PTPRN2	ENSBTAG00000004958	-254448
106	4:119084615..119084615	7	intron	-	6.15e-10	6.24e-05	-44.3313	hypomethylated	shore	PTPRN2	ENSBTAG00000004958	-245473
107	4:119094423..119094423	DMR	intergenic	+	2.58e-06	0.00945934	-39.032	hypomethylated	CpGi	PTPRN2	ENSBTAG00000004958	-235665
102	4:94251578..94251578	DMR5	intergenic	-	1.73e-05	0.02494	30.1987	hypermethylated	shore	MEST	ENSBTAG00000017223	528
109	5:103717370..103717370	DMR8	promoter; intron	-	3.7e-06	0.0112677	25.035	hypermethylated	shore	COPS7A	ENSBTAG00000011111	872
110	5:109478184..109478184	DMR9	intergenic	+	5.82e-06	0.013892	30.1708	hypermethylated	other	SH3BP1	ENSBTAG00000030257	-6007
111	5:117127274..117127274		intron	+	4.97e-05	0.0407989	52.1886	hypermethylated	CpGi	TBC1D22A	ENSBTAG00000012291	153193
112	5:119634112..119634112		intergenic	+	1.18e-05	0.0207115	29.237	hypermethylated	shore	MAPK11	ENSBTAG00000030182	430
108	5:1537982..1537982		intergenic	+	3.45e-05	0.0340808	-41.2051	hypomethylated	other	TPH2	ENSBTAG00000020792	-4027
113	6:67154365..67154365	DMR10	intergenic	+	1.6e-05	0.0240403	29.8156	hypermethylated	other	SLC10A4	ENSBTAG00000004888	-11011
114	7:11297489..11297489		exon	+	1.54e-05	0.0237496	27.7986	hypermethylated	CpGi	PTGER1/GIPC1	ENSBTAG00000017041/ENSBTAG00000000764	-2377
115	7:19123493..19123493	DMR11	intergenic	+	4.8e-05	0.04029	26.3824	hypermethylated	shore	KDM4B	ENSBTAG00000015487	93052		Marbling score
116	7:93055984..93055984		intergenic	-	1.42e-05	0.0227981	26.0276	hypermethylated	CpGi	NR2F1	ENSBTAG00000017599	3681
117	8:112071930..112071930		intergenic	-	3.81e-06	0.0113004	33.3724	hypermethylated	other	MYT1L	ENSBTAG00000003540	150263
119	9:101498227..101498227		intron	-	3.96e-05	0.0367536	27.4172	hypermethylated	other	RPS6KA2	ENSBTAG00000021741	-4717
120	9:102825338..102825338		intergenic	+	1.12e-05	0.0201091	-26.7738	hypomethylated	other	LOC101907681		28510						0.761905
121	9:102899238..102899238	DMR13	intergenic	+	1.99e-06	0.00845483	33.1129	hypermethylated	shore	XR_003036495		-28892
118	9:17549118..17549118	DMR12	intergenic	-	2.29e-08	0.000734154	35.8599	hypermethylated	other	MEI4	ENSBTAG00000054151	169057
122	Un_NW_020191935v1:35898..35898	DMR42	NA	-	1.18e-10	2.39e-05	34.8711	hypermethylated	other
123	X:133938029..133938029	DMR41	intergenic	+	5.46e-06	0.0134657	39.4773	hypermethylated	other	bta-mir-584-8	ENSBTAG00000045133	-147216
**	CattleQTLdb (Hu et al., 2019)

## Sheet: Table S5
DNA methylation may affect beef tenderness through signal transduction in Bos indicus
Table S5. Description of differentially methylated regions (DMR) including DMR ID, location, region type overlapped according to RefSeq (intergenic, exon, intron, promoter), statistics from differential methylation analysis (p-value, q-value, percent of difference between groups and status) and wether the DMC overlaps CpG island (CpGi), shore regions or other type of region. Next, the table shows…
DMR	Location	DMC.overlapped	DMR.overlap(Refseq)	pvalue	qvalue	meth.diff	status-meth(Tender)	CpGisland	Closest-gene	ENSEMBLid	closest_gene_distance	QTL-Nelore	QTL-other**
1	1:6270601..6270700	2	intron	1.42e-05	0.0138482	25.6533	Hypermethylated	other	GRIK1	ENSBTAG00000034854	158467
2	1:95385001..95385100	5	intron	3.92e-08	0.000484805	35.0547	Hypermethylated	other	FNDC3B	ENSBTAG00000019376	21399
3	1:99906401..99906500	6	intron	5.62e-06	0.0083664	30.2525	Hypermethylated	other	WDR49	ENSBTAG00000031618	83287
4	3:107925401..107925500	99	intergenic	7.8e-07	0.00263266	31.0345	Hypermethylated	other	POU3F1	ENSBTAG00000012061	4673
5	4:94251501..94251600	102	ptomoter;intron	1.73e-05	0.0150669	30.1987	Hypermethylated	shore	MEST	ENSBTAG00000017223	451
6	4:118869601..118869700	104	intron	6.72e-05	0.032153	-34.1537	Hypomethylated	other	PTPRN2	ENSBTAG00000004958	-460487
7	4:119084601..119084700	106	intergenic	1.64e-07	0.000949605	-26.7766	Hypomethylated	shore	PTPRN2	ENSBTAG00000004958	-245487
8	5:103717301..103717400	109	promoter; intron	3.7e-06	0.00654439	25.035	Hypermethylated	shore	COPS7A	ENSBTAG00000011111	842
9	5:109478101..109478200	110	intron	1.22e-08	0.000227058	30.3846	Hypermethylated	other	SH3BP1	ENSBTAG00000030257	-5991
10	6:67154301..67154400	113	intergenic	1.6e-05	0.014723	29.8156	Hypermethylated	other	SLC10A4	ENSBTAG00000004888	-10976
11	7:19123401..19123500	115	intron	4.8e-05	0.0263884	26.3824	Hypermethylated	shore	KDM4B	ENSBTAG00000015487	93045		Marbling score; Lignoceric acid content
12	9:17549101..17549200	118	intron	2.29e-08	0.000303814	35.8599	Hypermethylated	other	MEI4	ENSBTAG00000054151	169040
13	9:102899201..102899300	121	intergenic	1.99e-06	0.0047879	33.1129	Hypermethylated	shore	LOC101907681		-28855
14	10:9053101..9053200	.	intergenic	8.49e-05	0.0358922	30.485	Hypermethylated	other	bta-mir-2285v	ENSBTAG00000045329	83757
15	11:37097801..37097900	13	intron	1.31e-07	0.000836124	29.7947	Hypermethylated	other	LOC112448872	ENSBTAG00000051714	2002
16	11:105132001..105132100	18	exon	6.97e-05	0.0329147	25.0357	Hypermethylated	CpGi	LOC104973519		7367
17	12:76431201..76431300	.	ptomoter;intron	0.000126778	0.0443125	38.3279	Hypermethylated	shore	CLYBL	ENSBTAG00000004165	504
18	13:19739401..19739500	22	intron	4.45e-06	0.00734929	33.877	Hypermethylated	other	NRP1	ENSBTAG00000019866	104077	WBSF7; WHC
19	13:24251501..24251600	.	intron	0.000100826	0.0390674	28.6841	Hypermethylated	other	C13H10orf67		20101
20	13:57484901..57485000	23	ptomoter;intron	1.99e-05	0.0161126	25.5876	Hypermethylated	CpGi	GNAS	ENSBTAG00000052413	-888
21	13:57570301..57570400	24	intergenic	4.81e-05	0.0263884	28.2516	Hypermethylated	other	bta-mir-296		19377
22	14:16372801..16372900	31	intergenic	5.42e-06	0.00824195	26.2149	Hypermethylated	other	FBXO32	ENSBTAG00000016194	66609
23	14:61865501..61865600	34	intergenic	5.93e-05	0.0294201	34.2972	Hypermethylated	other	LOC112449534		-3087
24	16:42249501..42249600	.	intergenic	7.75e-05	0.0344769	30.0758	Hypermethylated	other	DISP3	ENSBTAG00000015533	-45252
25	16:78886501..78886600	39	intron	7.44e-08	0.000628032	25.8569	Hypermethylated	CpGi	NR5A2	ENSBTAG00000009265	41555
26	18:25473301..25473400	47	ptomoter;intron	1.11e-05	0.0123063	25.6356	Hypermethylated	shore	DOK4	ENSBTAG00000001857	440
27	18:55436901..55437000	51	intron	7.1e-07	0.00248643	32.8648	Hypermethylated	other	HSD17B14	ENSBTAG00000009174	10470		Longissimus muscle area
28	18:56263701..56263800	53	intron	7.94e-05	0.0346838	30.5457	Hypermethylated	other	IL4I1/ATF5	ENSBTAG00000003457/ENSBTAG00000050948	-5612/-4522
29	19:58586101..58586200	.	intron	2.72e-05	0.0195751	-27.08	Hypomethylated	other	LOC101907523	ENSBTAG00000055157	-32160
30	20:47436301..47436400	64	intergenic	6.06e-07	0.00248643	-28.8684	Hypomethylated	other	LOC104975285		279662
31	20:67487701..67487800	65	intergenic	1.39e-05	0.0138482	27.4669	Hypermethylated	other	ICE1	ENSBTAG00000018501	199032
32	21:21374301..21374400	67	intron	9.14e-06	0.0112744	32.5205	Hypermethylated	other	ARPIN	ENSBTAG00000027059	20394
33	22:48372701..48372800	.	exon; intron	0.000110337	0.0412227	34.0212	Hypermethylated	CpGi	STAB1/NISCH	ENSBTAG00000014782/ENSBTAG00000014779
34	23:43203801..43203900	76	exon	1.07e-08	0.000221475	-30.5119	Hypomethylated	other	GFOD1	ENSBTAG00000049619	12915
35	23:51777801..51777900	.	intron	7.56e-05	0.0342927	26.201	Hypermethylated	other	LOC104969983	ENSBTAG00000048529	2897
36	25:2126301..2126400	.	intron	1.79e-05	0.0153648	30.191	Hypermethylated	shore	PRSS27	ENSBTAG00000040394	6557
37	25:38895401..38895500	85	intron	6.21e-08	0.000548966	-28.774	Hypomethylated	other	TNRC18	ENSBTAG00000037400	9605
38	26:23247701..23247800	.	intergenic	0.000125475	0.0441064	28.1625	Hypermethylated	other	TRIM8	ENSBTAG00000021071	-17925
39	26:45312001..45312100	.	intron	9.93e-05	0.0388659	51.3636	Hypermethylated	other	UROS	ENSBTAG00000005791	8493
40	26:49275301..49275400	89, 90	intergenic	0.000100645	0.0390674	25.393	Hypermethylated	CpGi	EBF3	ENSBTAG00000008272	-3337
41	X:133938001..133938100	123	intergenic	9.17e-05	0.0374894	35.5243	Hypermethylated	other	bta-mir-584-8	ENSBTAG00000045133	-147145
42	Un_NW_020191935v1:35801..35900	122	NA	1.18e-10	5.47e-06	34.8711	Hypermethylated	other	.
**	CattleQTLdb (Hu et al., 2019)

## Sheet: Table S6
DNA methylation may affect beef tenderness through signal transduction in Bos indicus
Table S6. Putative Target genes of each DMC and DMR. Predicted Target genes were retrieved from the FAANG pilot project (Kern et al., 2021) using the UCSC Genome Browser.
Element	Target Gene information
	#chrom	chromStart	chromEnd	name	score	value	exp	color	sourceChrom	sourceStart	sourceEnd	sourceName	sourceStrand	targetChrom	targetStart	targetEnd	targetName	targetStrand
DMC7	chr1	113234818	113741000	chr1:113738800-113741000/ENSBTAG00000006147	473	0.736654	.	255134134	chr1	113738800	113741000	chr1:113738800-113741000	.	chr1	113234818	113234819	ENSBTAG00000006147	.
DMC7	chr1	113234818	114044600	chr1:114043800-114044600/ENSBTAG00000006147	623	-0.81175	.	96,96,255	chr1	114043800	114044600	chr1:114043800-114044600	.	chr1	113234818	113234819	ENSBTAG00000006147	.
DMC6	chr1	97562712	99909000	chr1:99905400-99909000/ENSBTAG00000006409	564	0.782353	.	255111111	chr1	99905400	99909000	chr1:99905400-99909000	.	chr1	97562712	97562713	ENSBTAG00000006409	.
DMC6	chr1	98662615	99909000	chr1:99905400-99909000/ENSBTAG00000054693	469	0.734516	.	255135135	chr1	99905400	99909000	chr1:99905400-99909000	.	chr1	98662615	98662616	ENSBTAG00000054693	.
DMC6	chr1	99743550	99909000	chr1:99905400-99909000/ENSBTAG00000012708	505	0.752941	.	255126126	chr1	99905400	99909000	chr1:99905400-99909000	.	chr1	99743550	99743551	ENSBTAG00000012708	.
DMC6	chr1	99823209	99909000	chr1:99905400-99909000/ENSBTAG00000031618	671	0.835914	.	255,83,83	chr1	99905400	99909000	chr1:99905400-99909000	.	chr1	99823209	99823210	ENSBTAG00000031618	.
DMC6	chr1	99905400	99995832	chr1:99905400-99909000/ENSBTAG00000011423	540	0.770235	.	255117117	chr1	99905400	99909000	chr1:99905400-99909000	.	chr1	99995832	99995833	ENSBTAG00000011423	.
DMC8	chr1	153514351	154068800	chr1:154064400-154068800/ENSBTAG00000030593	529	0.764706	.	255120120	chr1	154064400	154068800	chr1:154064400-154068800	.	chr1	153514351	153514352	ENSBTAG00000030593	.
DMC8	chr1	153514351	154146000	chr1:154140200-154146000/ENSBTAG00000030593	564	0.782353	.	255111111	chr1	154140200	154146000	chr1:154140200-154146000	.	chr1	153514351	153514352	ENSBTAG00000030593	.
DMC8	chr1	153543136	154146000	chr1:154140200-154146000/ENSBTAG00000051752	536	0.768212	.	255118118	chr1	154140200	154146000	chr1:154140200-154146000	.	chr1	153543136	153543137	ENSBTAG00000051752	.
DMC4	chr1	60368418	60736800	chr1:60734800-60736800/ENSBTAG00000049208	493	0.746903	.	255129129	chr1	60734800	60736800	chr1:60734800-60736800	.	chr1	60368418	60368419	ENSBTAG00000049208	.
DMC4	chr1	60368418	60742800	chr1:60742400-60742800/ENSBTAG00000049208	449	0.724935	.	255140140	chr1	60742400	60742800	chr1:60742400-60742800	.	chr1	60368418	60368419	ENSBTAG00000049208	.
DMC4	chr1	60368418	60749600	chr1:60748200-60749600/ENSBTAG00000049208	713	0.856742	.	255,73,73	chr1	60748200	60749600	chr1:60748200-60749600	.	chr1	60368418	60368419	ENSBTAG00000049208	.
DMC4	chr1	60368418	60753600	chr1:60751400-60753600/ENSBTAG00000049208	416	0.708037	.	255148148	chr1	60751400	60753600	chr1:60751400-60753600	.	chr1	60368418	60368419	ENSBTAG00000049208	.
DMC4	chr1	60368418	60857600	chr1:60857200-60857600/ENSBTAG00000049208	507	0.753662	.	255125125	chr1	60857200	60857600	chr1:60857200-60857600	.	chr1	60368418	60368419	ENSBTAG00000049208	.
DMC4	chr1	60368418	60884600	chr1:60882200-60884600/ENSBTAG00000049208	672	0.836464	.	255,83,83	chr1	60882200	60884600	chr1:60882200-60884600	.	chr1	60368418	60368419	ENSBTAG00000049208	.
DMC4	chr1	60368418	60977200	chr1:60976400-60977200/ENSBTAG00000049208	453	0.726625	.	255139139	chr1	60976400	60977200	chr1:60976400-60977200	.	chr1	60368418	60368419	ENSBTAG00000049208	.
DMC4	chr1	60368418	60995400	chr1:60993000-60995400/ENSBTAG00000049208	642	0.821255	.	255,91,91	chr1	60993000	60995400	chr1:60993000-60995400	.	chr1	60368418	60368419	ENSBTAG00000049208	.
DMC4	chr1	60368418	61011600	chr1:61009800-61011600/ENSBTAG00000049208	645	0.822945	.	255,90,90	chr1	61009800	61011600	chr1:61009800-61011600	.	chr1	60368418	60368419	ENSBTAG00000049208	.
DMC5	chr1	93276200	95406498	chr1:93276200-93279200/ENSBTAG00000019376	552	-0.776471	.	114114255	chr1	93276200	93279200	chr1:93276200-93279200	.	chr1	95406498	95406499	ENSBTAG00000019376	.
DMC5	chr1	93283800	95406498	chr1:93283800-93285600/ENSBTAG00000019376	458	-0.729412	.	138138255	chr1	93283800	93285600	chr1:93283800-93285600	.	chr1	95406498	95406499	ENSBTAG00000019376	.
DMC5	chr1	93288400	95406498	chr1:93288400-93292200/ENSBTAG00000019376	494	-0.747059	.	129129255	chr1	93288400	93292200	chr1:93288400-93292200	.	chr1	95406498	95406499	ENSBTAG00000019376	.
DMC5	chr1	93559800	95406498	chr1:93559800-93562200/ENSBTAG00000019376	599	-0.8	.	102102255	chr1	93559800	93562200	chr1:93559800-93562200	.	chr1	95406498	95406499	ENSBTAG00000019376	.
DMC5	chr1	93604400	95406498	chr1:93604400-93605000/ENSBTAG00000019376	547	-0.773529	.	115115255	chr1	93604400	93605000	chr1:93604400-93605000	.	chr1	95406498	95406499	ENSBTAG00000019376	.
DMC5	chr1	94320196	95434800	chr1:95430000-95434800/ENSBTAG00000031802	456	0.728477	.	255138138	chr1	95430000	95434800	chr1:95430000-95434800	.	chr1	94320196	94320197	ENSBTAG00000031802	.
DMC5	chr1	94818555	95396600	chr1:95390000-95396600/ENSBTAG00000020073	541	-0.770588	.	117117255	chr1	95390000	95396600	chr1:95390000-95396600	.	chr1	94818555	94818556	ENSBTAG00000020073	.
DMC5	chr1	94818555	95403400	chr1:95401400-95403400/ENSBTAG00000020073	570	-0.785294	.	109109255	chr1	95401400	95403400	chr1:95401400-95403400	.	chr1	94818555	94818556	ENSBTAG00000020073	.
DMC5	chr1	94818555	95434800	chr1:95430000-95434800/ENSBTAG00000020073	717	-0.858824	.	72,72,255	chr1	95430000	95434800	chr1:95430000-95434800	.	chr1	94818555	94818556	ENSBTAG00000020073	.
DMC5	chr1	94818555	95440800	chr1:95435600-95440800/ENSBTAG00000020073	517	-0.758824	.	123123255	chr1	95435600	95440800	chr1:95435600-95440800	.	chr1	94818555	94818556	ENSBTAG00000020073	.
DMC5	chr1	94818555	95450800	chr1:95446200-95450800/ENSBTAG00000020073	452	-0.726471	.	139139255	chr1	95446200	95450800	chr1:95446200-95450800	.	chr1	94818555	94818556	ENSBTAG00000020073	.
DMC5	chr1	94818555	95482600	chr1:95481800-95482600/ENSBTAG00000020073	576	-0.788235	.	108108255	chr1	95481800	95482600	chr1:95481800-95482600	.	chr1	94818555	94818556	ENSBTAG00000020073	.
DMC5	chr1	94926600	95406498	chr1:94926600-94936400/ENSBTAG00000019376	523	0.761765	.	255121121	chr1	94926600	94936400	chr1:94926600-94936400	.	chr1	95406498	95406499	ENSBTAG00000019376	.
DMC5	chr1	94950600	95406498	chr1:94950600-94958200/ENSBTAG00000019376	535	0.767647	.	255118118	chr1	94950600	94958200	chr1:94950600-94958200	.	chr1	95406498	95406499	ENSBTAG00000019376	.
DMC5	chr1	94967600	95406498	chr1:94967600-94976200/ENSBTAG00000019376	441	0.720588	.	255142142	chr1	94967600	94976200	chr1:94967600-94976200	.	chr1	95406498	95406499	ENSBTAG00000019376	.
DMC5	chr1	94985031	95396600	chr1:95390000-95396600/ENSBTAG00000018994	535	0.767647	.	255118118	chr1	95390000	95396600	chr1:95390000-95396600	.	chr1	94985031	94985032	ENSBTAG00000018994	.
DMC18	chr11	105124600	105450692	chr11:105124600-105125600/ENSBTAG00000048155	570	-0.785294	.	109109255	chr11	105124600	105125600	chr11:105124600-105125600	.	chr11	105450692	105450693	ENSBTAG00000048155	.
DMC13	chr11	105574625	105999400	chr11:105997200-105999400/ENSBTAG00000052600	582	0.791176	.	255106106	chr11	105997200	105999400	chr11:105997200-105999400	.	chr11	105574625	105574626	ENSBTAG00000052600	.
DMC13	chr11	105574625	106059200	chr11:106059000-106059200/ENSBTAG00000052600	705	0.852941	.	255,75,75	chr11	106059000	106059200	chr11:106059000-106059200	.	chr11	105574625	105574626	ENSBTAG00000052600	.
DMC13	chr11	105574625	106061200	chr11:106061000-106061200/ENSBTAG00000052600	752	0.876471	.	255,63,63	chr11	106061000	106061200	chr11:106061000-106061200	.	chr11	105574625	105574626	ENSBTAG00000052600	.
DMC13	chr11	105574625	106062600	chr11:106062400-106062600/ENSBTAG00000052600	570	0.785294	.	255109109	chr11	106062400	106062600	chr11:106062400-106062600	.	chr11	105574625	105574626	ENSBTAG00000052600	.
DMC13	chr11	105574625	106083400	chr11:106082600-106083400/ENSBTAG00000052600	435	0.717647	.	255144144	chr11	106082600	106083400	chr11:106082600-106083400	.	chr11	105574625	105574626	ENSBTAG00000052600	.
DMC13	chr11	105574625	106095200	chr11:106094800-106095200/ENSBTAG00000052600	599	0.8	.	255102102	chr11	106094800	106095200	chr11:106094800-106095200	.	chr11	105574625	105574626	ENSBTAG00000052600	.
DMC13	chr11	105574625	106100000	chr11:106096200-106100000/ENSBTAG00000052600	664	0.832353	.	255,85,85	chr11	106096200	106100000	chr11:106096200-106100000	.	chr11	105574625	105574626	ENSBTAG00000052600	.
DMC13	chr11	105588400	106021670	chr11:105588400-105589400/ENSBTAG00000015074	476	0.738235	.	255133133	chr11	105588400	105589400	chr11:105588400-105589400	.	chr11	106021670	106021671	ENSBTAG00000015074	.
DMC13	chr11	105588400	106026182	chr11:105588400-105589400/ENSBTAG00000030296	470	0.735351	.	255135135	chr11	105588400	105589400	chr11:105588400-105589400	.	chr11	106026182	106026183	ENSBTAG00000030296	.
DMC13	chr11	105588400	106221057	chr11:105588400-105589400/ENSBTAG00000047715	464	0.732353	.	255136136	chr11	105588400	105589400	chr11:105588400-105589400	.	chr11	106221057	106221058	ENSBTAG00000047715	.
DMC13	chr11	105613800	106221057	chr11:105613800-105625200/ENSBTAG00000047715	441	0.720588	.	255142142	chr11	105613800	105625200	chr11:105613800-105625200	.	chr11	106221057	106221058	ENSBTAG00000047715	.
DMC13	chr11	105666000	105961068	chr11:105666000-105667000/ENSBTAG00000010497	564	-0.782353	.	111111255	chr11	105666000	105667000	chr11:105666000-105667000	.	chr11	105961068	105961069	ENSBTAG00000010497	.
DMC13	chr11	105666000	106134589	chr11:105666000-105667000/ENSBTAG00000047958	476	-0.738235	.	133133255	chr11	105666000	105667000	chr11:105666000-105667000	.	chr11	106134589	106134590	ENSBTAG00000047958	.
DMC13	chr11	105719600	105961068	chr11:105719600-105720200/ENSBTAG00000010497	652	-0.826471	.	88,88,255	chr11	105719600	105720200	chr11:105719600-105720200	.	chr11	105961068	105961069	ENSBTAG00000010497	.
DMC13	chr11	105719600	106134589	chr11:105719600-105720200/ENSBTAG00000047958	552	-0.776471	.	114114255	chr11	105719600	105720200	chr11:105719600-105720200	.	chr11	106134589	106134590	ENSBTAG00000047958	.
DMC13	chr11	105733400	105961068	chr11:105733400-105737000/ENSBTAG00000010497	529	-0.764706	.	120120255	chr11	105733400	105737000	chr11:105733400-105737000	.	chr11	105961068	105961069	ENSBTAG00000010497	.
DMC13	chr11	105733400	106026182	chr11:105733400-105737000/ENSBTAG00000030296	516	0.758	.	255123123	chr11	105733400	105737000	chr11:105733400-105737000	.	chr11	106026182	106026183	ENSBTAG00000030296	.
DMC13	chr11	105738000	105961068	chr11:105738000-105740800/ENSBTAG00000010497	458	-0.729412	.	138138255	chr11	105738000	105740800	chr11:105738000-105740800	.	chr11	105961068	105961069	ENSBTAG00000010497	.
DMC13	chr11	105777200	105961068	chr11:105777200-105777800/ENSBTAG00000010497	599	-0.8	.	102102255	chr11	105777200	105777800	chr11:105777200-105777800	.	chr11	105961068	105961069	ENSBTAG00000010497	.
DMC13	chr11	105777200	106026182	chr11:105777200-105777800/ENSBTAG00000030296	618	0.809339	.	255,97,97	chr11	105777200	105777800	chr11:105777200-105777800	.	chr11	106026182	106026183	ENSBTAG00000030296	.
DMC13	chr11	105777200	106065509	chr11:105777200-105777800/ENSBTAG00000047254	582	0.791176	.	255106106	chr11	105777200	105777800	chr11:105777200-105777800	.	chr11	106065509	106065510	ENSBTAG00000047254	.
DMC13	chr11	105777200	106144612	chr11:105777200-105777800/ENSBTAG00000053827	542	0.771362	.	255116116	chr11	105777200	105777800	chr11:105777200-105777800	.	chr11	106144612	106144613	ENSBTAG00000053827	.
DMC13	chr11	105778600	105961068	chr11:105778600-105779400/ENSBTAG00000010497	452	-0.726471	.	139139255	chr11	105778600	105779400	chr11:105778600-105779400	.	chr11	105961068	105961069	ENSBTAG00000010497	.
DMC13	chr11	105781600	105961068	chr11:105781600-105782400/ENSBTAG00000010497	541	-0.770588	.	117117255	chr11	105781600	105782400	chr11:105781600-105782400	.	chr11	105961068	105961069	ENSBTAG00000010497	.
DMC13	chr11	105798587	106061200	chr11:106061000-106061200/ENSBTAG00000052127	435	0.717647	.	255144144	chr11	106061000	106061200	chr11:106061000-106061200	.	chr11	105798587	105798588	ENSBTAG00000052127	.
DMC13	chr11	105806918	106061200	chr11:106061000-106061200/ENSBTAG00000030317	523	0.761765	.	255121121	chr11	106061000	106061200	chr11:106061000-106061200	.	chr11	105806918	105806919	ENSBTAG00000030317	.
DMC13	chr11	105866000	105961068	chr11:105866000-105867200/ENSBTAG00000010497	505	-0.752941	.	126126255	chr11	105866000	105867200	chr11:105866000-105867200	.	chr11	105961068	105961069	ENSBTAG00000010497	.
DMC13	chr11	105873284	106059200	chr11:106059000-106059200/ENSBTAG00000001206	581	0.790809	.	255106106	chr11	106059000	106059200	chr11:106059000-106059200	.	chr11	105873284	105873285	ENSBTAG00000001206	.
DMC13	chr11	105873284	106095200	chr11:106094800-106095200/ENSBTAG00000001206	542	0.771362	.	255116116	chr11	106094800	106095200	chr11:106094800-106095200	.	chr11	105873284	105873285	ENSBTAG00000001206	.
DMC13	chr11	105931316	106028800	chr11:106028200-106028800/ENSBTAG00000039708	473	0.736861	.	255134134	chr11	106028200	106028800	chr11:106028200-106028800	.	chr11	105931316	105931317	ENSBTAG00000039708	.
DMC13	chr11	105931316	106059200	chr11:106059000-106059200/ENSBTAG00000039708	467	0.733841	.	255135135	chr11	106059000	106059200	chr11:106059000-106059200	.	chr11	105931316	105931317	ENSBTAG00000039708	.
DMC13	chr11	105931316	106061200	chr11:106061000-106061200/ENSBTAG00000039708	488	0.744411	.	255130130	chr11	106061000	106061200	chr11:106061000-106061200	.	chr11	105931316	105931317	ENSBTAG00000039708	.
DMC13	chr11	105931316	106095200	chr11:106094800-106095200/ENSBTAG00000039708	516	0.758	.	255123123	chr11	106094800	106095200	chr11:106094800-106095200	.	chr11	105931316	105931317	ENSBTAG00000039708	.
DMC13	chr11	105931316	106100000	chr11:106096200-106100000/ENSBTAG00000039708	482	0.741391	.	255132132	chr11	106096200	106100000	chr11:106096200-106100000	.	chr11	105931316	105931317	ENSBTAG00000039708	.
DMC13	chr11	105931316	106156200	chr11:106155000-106156200/ENSBTAG00000039708	491	0.745921	.	255129129	chr11	106155000	106156200	chr11:106155000-106156200	.	chr11	105931316	105931317	ENSBTAG00000039708	.
DMC13	chr11	105931316	106216400	chr11:106216200-106216400/ENSBTAG00000039708	434	0.717231	.	255144144	chr11	106216200	106216400	chr11:106216200-106216400	.	chr11	105931316	105931317	ENSBTAG00000039708	.
DMC13	chr11	36831220	37304200	chr11:37303800-37304200/ENSBTAG00000006852	635	-0.817647	.	93,93,255	chr11	37303800	37304200	chr11:37303800-37304200	.	chr11	36831220	36831221	ENSBTAG00000006852	.
DMC14	chr11	97676252	97901800	chr11:97886200-97901800/ENSBTAG00000023843	476	0.738235	.	255133133	chr11	97886200	97901800	chr11:97886200-97901800	.	chr11	97676252	97676253	ENSBTAG00000023843	.
DMC11	chr11	13046800	13559661	chr11:13046800-13047600/ENSBTAG00000004562	693	-0.846664	.	78,78,255	chr11	13046800	13047600	chr11:13046800-13047600	.	chr11	13559661	13559662	ENSBTAG00000004562	.
DMC11	chr11	13101400	13861144	chr11:13101400-13114400/ENSBTAG00000000783	622	-0.811213	.	96,96,255	chr11	13101400	13114400	chr11:13101400-13114400	.	chr11	13861144	13861145	ENSBTAG00000000783	.
DMC11	chr11	13188000	13572359	chr11:13188000-13191200/ENSBTAG00000004560	541	0.770588	.	255117117	chr11	13188000	13191200	chr11:13188000-13191200	.	chr11	13572359	13572360	ENSBTAG00000004560	.
DMC11	chr11	13297600	13559661	chr11:13297600-13300400/ENSBTAG00000004562	504	-0.752416	.	126126255	chr11	13297600	13300400	chr11:13297600-13300400	.	chr11	13559661	13559662	ENSBTAG00000004562	.
DMC11	chr11	13389200	13861144	chr11:13389200-13390000/ENSBTAG00000000783	457	0.728617	.	255138138	chr11	13389200	13390000	chr11:13389200-13390000	.	chr11	13861144	13861145	ENSBTAG00000000783	.
DMC11	chr11	13405830	13694600	chr11:13693000-13694600/ENSBTAG00000014668	494	-0.747059	.	129129255	chr11	13693000	13694600	chr11:13693000-13694600	.	chr11	13405830	13405831	ENSBTAG00000014668	.
DMC11	chr11	13411110	13694600	chr11:13693000-13694600/ENSBTAG00000048791	570	-0.785294	.	109109255	chr11	13693000	13694600	chr11:13693000-13694600	.	chr11	13411110	13411111	ENSBTAG00000048791	.
DMC12	chr11	29266200	29782764	chr11:29266200-29267600/ENSBTAG00000006474	723	-0.861765	.	70,70,255	chr11	29266200	29267600	chr11:29266200-29267600	.	chr11	29782764	29782765	ENSBTAG00000006474	.
DMC12	chr11	29405102	29669600	chr11:29668000-29669600/ENSBTAG00000032558	605	-0.802941	.	100100255	chr11	29668000	29669600	chr11:29668000-29669600	.	chr11	29405102	29405103	ENSBTAG00000032558	.
DMC15	chr11	98765006	99096800	chr11:99096600-99096800/ENSBTAG00000016218	558	-0.779412	.	112112255	chr11	99096600	99096800	chr11:99096600-99096800	.	chr11	98765006	98765007	ENSBTAG00000016218	.
DMC15	chr11	98829600	99104054	chr11:98829600-98832000/ENSBTAG00000015327	547	0.773529	.	255115115	chr11	98829600	98832000	chr11:98829600-98832000	.	chr11	99104054	99104055	ENSBTAG00000015327	.
DMC15	chr11	98833000	99104054	chr11:98833000-98834200/ENSBTAG00000015327	594	0.797059	.	255103103	chr11	98833000	98834200	chr11:98833000-98834200	.	chr11	99104054	99104055	ENSBTAG00000015327	.
DMC15	chr11	98835400	99104054	chr11:98835400-98836000/ENSBTAG00000015327	435	0.717647	.	255144144	chr11	98835400	98836000	chr11:98835400-98836000	.	chr11	99104054	99104055	ENSBTAG00000015327	.
DMC16	chr11	100920200	101225317	chr11:100920200-100922200/ENSBTAG00000017473	486	0.743017	.	255131131	chr11	100920200	100922200	chr11:100920200-100922200	.	chr11	101225317	101225318	ENSBTAG00000017473	.
DMC16	chr11	101112000	101225317	chr11:101112000-101112600/ENSBTAG00000017473	651	0.825915	.	255,88,88	chr11	101112000	101112600	chr11:101112000-101112600	.	chr11	101225317	101225318	ENSBTAG00000017473	.
DMC16	chr11	101126200	101225317	chr11:101126200-101127200/ENSBTAG00000017473	461	0.730735	.	255137137	chr11	101126200	101127200	chr11:101126200-101127200	.	chr11	101225317	101225318	ENSBTAG00000017473	.
DMC20	chr12	19155765	19450600	chr12:19450200-19450600/ENSBTAG00000034269	476	-0.738235	.	133133255	chr12	19450200	19450600	chr12:19450200-19450600	.	chr12	19155765	19155766	ENSBTAG00000034269	.
DMC20	chr12	19179821	19191400	chr12:19182600-19191400/ENSBTAG00000016998	788	0.894118	.	255,54,54	chr12	19182600	19191400	chr12:19182600-19191400	.	chr12	19179821	19179822	ENSBTAG00000016998	.
DMC21	chr12	30826200	31388275	chr12:30826200-30827400/ENSBTAG00000001094	476	-0.738235	.	133133255	chr12	30826200	30827400	chr12:30826200-30827400	.	chr12	31388275	31388276	ENSBTAG00000001094	.
DMC24	chr13	57465706	57723400	chr13:57723000-57723400/ENSBTAG00000017475	611	0.805882	.	255,99,99	chr13	57723000	57723400	chr13:57723000-57723400	.	chr13	57465706	57465707	ENSBTAG00000017475	.
DMC24	chr13	57467800	58563618	chr13:57467800-57469400/ENSBTAG00000012406	429	0.714706	.	255145145	chr13	57467800	57469400	chr13:57467800-57469400	.	chr13	58563618	58563619	ENSBTAG00000012406	.
DMC24	chr13	57484014	57890400	chr13:57889200-57890400/ENSBTAG00000052413	582	0.791176	.	255106106	chr13	57889200	57890400	chr13:57889200-57890400	.	chr13	57484014	57484015	ENSBTAG00000052413	.
DMC24	chr13	57484014	58023000	chr13:58022600-58023000/ENSBTAG00000052413	494	-0.747059	.	129129255	chr13	58022600	58023000	chr13:58022600-58023000	.	chr13	57484014	57484015	ENSBTAG00000052413	.
DMC24	chr13	57516200	58563618	chr13:57516200-57518800/ENSBTAG00000012406	482	-0.741176	.	132132255	chr13	57516200	57518800	chr13:57516200-57518800	.	chr13	58563618	58563619	ENSBTAG00000012406	.
DMC24	chr13	57532635	58011400	chr13:58010800-58011400/ENSBTAG00000047223	599	0.8	.	255102102	chr13	58010800	58011400	chr13:58010800-58011400	.	chr13	57532635	57532636	ENSBTAG00000047223	.
DMC23	chr13	57465706	57723400	chr13:57723000-57723400/ENSBTAG00000017475	611	0.805882	.	255,99,99	chr13	57723000	57723400	chr13:57723000-57723400	.	chr13	57465706	57465707	ENSBTAG00000017475	.
DMC23	chr13	57467800	58563618	chr13:57467800-57469400/ENSBTAG00000012406	429	0.714706	.	255145145	chr13	57467800	57469400	chr13:57467800-57469400	.	chr13	58563618	58563619	ENSBTAG00000012406	.
DMC23	chr13	57484014	57890400	chr13:57889200-57890400/ENSBTAG00000052413	582	0.791176	.	255106106	chr13	57889200	57890400	chr13:57889200-57890400	.	chr13	57484014	57484015	ENSBTAG00000052413	.
DMC23	chr13	57484014	58023000	chr13:58022600-58023000/ENSBTAG00000052413	494	-0.747059	.	129129255	chr13	58022600	58023000	chr13:58022600-58023000	.	chr13	57484014	57484015	ENSBTAG00000052413	.
DMC22	chr13	19546000	19971622	chr13:19546000-19546600/ENSBTAG00000015910	458	0.729412	.	255138138	chr13	19546000	19546600	chr13:19546000-19546600	.	chr13	19971622	19971623	ENSBTAG00000015910	.
DMC22	chr13	19635324	19751200	chr13:19748600-19751200/ENSBTAG00000019866	541	0.770588	.	255117117	chr13	19748600	19751200	chr13:19748600-19751200	.	chr13	19635324	19635325	ENSBTAG00000019866	.
DMC22	chr13	19635324	19772000	chr13:19764200-19772000/ENSBTAG00000019866	682	0.841176	.	255,81,81	chr13	19764200	19772000	chr13:19764200-19772000	.	chr13	19635324	19635325	ENSBTAG00000019866	.
DMC22	chr13	19635324	19923200	chr13:19919800-19923200/ENSBTAG00000019866	688	0.844118	.	255,79,79	chr13	19919800	19923200	chr13:19919800-19923200	.	chr13	19635324	19635325	ENSBTAG00000019866	.
DMC22	chr13	19639800	19971622	chr13:19639800-19643200/ENSBTAG00000015910	447	0.723529	.	255141141	chr13	19639800	19643200	chr13:19639800-19643200	.	chr13	19971622	19971623	ENSBTAG00000015910	.
DMC22	chr13	19674800	19971622	chr13:19674800-19675400/ENSBTAG00000015910	500	0.75	.	255127127	chr13	19674800	19675400	chr13:19674800-19675400	.	chr13	19971622	19971623	ENSBTAG00000015910	.
DMC75	chr13	19680400	19971622	chr13:19680400-19681600/ENSBTAG00000015910	670	0.835294	.	255,84,84	chr13	19680400	19681600	chr13:19680400-19681600	.	chr13	19971622	19971623	ENSBTAG00000015910	.
DMC25	chr13	57467800	58563618	chr13:57467800-57469400/ENSBTAG00000012406	429	0.714706	.	255145145	chr13	57467800	57469400	chr13:57467800-57469400	.	chr13	58563618	58563619	ENSBTAG00000012406	.
DMC25	chr13	57516200	58563618	chr13:57516200-57518800/ENSBTAG00000012406	482	-0.741176	.	132132255	chr13	57516200	57518800	chr13:57516200-57518800	.	chr13	58563618	58563619	ENSBTAG00000012406	.
DMC25	chr13	57745000	58563618	chr13:57745000-57746400/ENSBTAG00000012406	517	-0.758824	.	123123255	chr13	57745000	57746400	chr13:57745000-57746400	.	chr13	58563618	58563619	ENSBTAG00000012406	.
DMC25	chr13	58063400	58563618	chr13:58063400-58065200/ENSBTAG00000012406	617	0.808824	.	255,97,97	chr13	58063400	58065200	chr13:58063400-58065200	.	chr13	58563618	58563619	ENSBTAG00000012406	.
DMC25	chr13	58474800	58563618	chr13:58474800-58476000/ENSBTAG00000012406	594	0.797059	.	255103103	chr13	58474800	58476000	chr13:58474800-58476000	.	chr13	58563618	58563619	ENSBTAG00000012406	.
DMC34	chr14	61406000	62384855	chr14:61406000-61406400/ENSBTAG00000026963	494	0.747059	.	255129129	chr14	61406000	61406400	chr14:61406000-61406400	.	chr14	62384855	62384856	ENSBTAG00000026963	.
DMC34	chr14	61450792	62706800	chr14:62704400-62706800/ENSBTAG00000013513	494	-0.747059	.	129129255	chr14	62704400	62706800	chr14:62704400-62706800	.	chr14	61450792	61450793	ENSBTAG00000013513	.
DMC29	chr14	1648800	1862330	chr14:1648800-1649000/ENSBTAG00000006385	451	0.725534	.	255139139	chr14	1648800	1649000	chr14:1648800-1649000	.	chr14	1862330	1862331	ENSBTAG00000006385	.
DMC29	chr14	1669738	1736800	chr14:1732400-1736800/ENSBTAG00000005762	452	0.726471	.	255139139	chr14	1732400	1736800	chr14:1732400-1736800	.	chr14	1669738	1669739	ENSBTAG00000005762	.
DMC29	chr14	1669738	1743800	chr14:1743400-1743800/ENSBTAG00000005762	588	0.794118	.	255105105	chr14	1743400	1743800	chr14:1743400-1743800	.	chr14	1669738	1669739	ENSBTAG00000005762	.
DMC29	chr14	1669738	1797400	chr14:1796400-1797400/ENSBTAG00000005762	488	0.744118	.	255130130	chr14	1796400	1797400	chr14:1796400-1797400	.	chr14	1669738	1669739	ENSBTAG00000005762	.
DMC29	chr14	1669738	1830000	chr14:1820600-1830000/ENSBTAG00000005762	529	0.764706	.	255120120	chr14	1820600	1830000	chr14:1820600-1830000	.	chr14	1669738	1669739	ENSBTAG00000005762	.
DMC29	chr14	1669738	1839200	chr14:1836400-1839200/ENSBTAG00000005762	488	0.744118	.	255130130	chr14	1836400	1839200	chr14:1836400-1839200	.	chr14	1669738	1669739	ENSBTAG00000005762	.
DMC29	chr14	1669738	1858400	chr14:1855200-1858400/ENSBTAG00000005762	588	0.794118	.	255105105	chr14	1855200	1858400	chr14:1855200-1858400	.	chr14	1669738	1669739	ENSBTAG00000005762	.
DMC29	chr14	1669738	1876000	chr14:1870800-1876000/ENSBTAG00000005762	588	0.794118	.	255105105	chr14	1870800	1876000	chr14:1870800-1876000	.	chr14	1669738	1669739	ENSBTAG00000005762	.
DMC32	chr14	33520800	35441608	chr14:33520800-33521200/ENSBTAG00000005404	488	0.744118	.	255130130	chr14	33520800	33521200	chr14:33520800-33521200	.	chr14	35441608	35441609	ENSBTAG00000005404	.
DMC30	chr14	11959600	15914441	chr14:11959600-11963800/ENSBTAG00000048373	517	-0.758824	.	123123255	chr14	11959600	11963800	chr14:11959600-11963800	.	chr14	15914441	15914442	ENSBTAG00000048373	.
DMC30	chr14	12079200	13791785	chr14:12079200-12079800/ENSBTAG00000052622	487	0.743806	.	255130130	chr14	12079200	12079800	chr14:12079200-12079800	.	chr14	13791785	13791786	ENSBTAG00000052622	.
DMC30	chr14	12198600	15560939	chr14:12198600-12199800/ENSBTAG00000020405	570	-0.785294	.	109109255	chr14	12198600	12199800	chr14:12198600-12199800	.	chr14	15560939	15560940	ENSBTAG00000020405	.
DMC30	chr14	12253400	15560939	chr14:12253400-12255800/ENSBTAG00000020405	494	-0.747059	.	129129255	chr14	12253400	12255800	chr14:12253400-12255800	.	chr14	15560939	15560940	ENSBTAG00000020405	.
DMC30	chr14	12334400	13791785	chr14:12334400-12336200/ENSBTAG00000052622	437	-0.718775	.	143143255	chr14	12334400	12336200	chr14:12334400-12336200	.	chr14	13791785	13791786	ENSBTAG00000052622	.
DMC30	chr14	12359200	13819730	chr14:12359200-12359600/ENSBTAG00000049356	487	-0.743724	.	130130255	chr14	12359200	12359600	chr14:12359200-12359600	.	chr14	13819730	13819731	ENSBTAG00000049356	.
DMC30	chr14	12370000	15914441	chr14:12370000-12370600/ENSBTAG00000048373	452	-0.726471	.	139139255	chr14	12370000	12370600	chr14:12370000-12370600	.	chr14	15914441	15914442	ENSBTAG00000048373	.
DMC30	chr14	12442600	15914441	chr14:12442600-12445000/ENSBTAG00000048373	482	-0.741176	.	132132255	chr14	12442600	12445000	chr14:12442600-12445000	.	chr14	15914441	15914442	ENSBTAG00000048373	.
DMC30	chr14	12454400	15560939	chr14:12454400-12456800/ENSBTAG00000020405	541	-0.770588	.	117117255	chr14	12454400	12456800	chr14:12454400-12456800	.	chr14	15560939	15560940	ENSBTAG00000020405	.
DMC30	chr14	12454400	15914441	chr14:12454400-12456800/ENSBTAG00000048373	652	-0.826471	.	88,88,255	chr14	12454400	12456800	chr14:12454400-12456800	.	chr14	15914441	15914442	ENSBTAG00000048373	.
DMC30	chr14	12468400	12658366	chr14:12468400-12469200/ENSBTAG00000008409	635	0.817647	.	255,93,93	chr14	12468400	12469200	chr14:12468400-12469200	.	chr14	12658366	12658367	ENSBTAG00000008409	.
DMC30	chr14	12468400	15914441	chr14:12468400-12469200/ENSBTAG00000048373	482	-0.741176	.	132132255	chr14	12468400	12469200	chr14:12468400-12469200	.	chr14	15914441	15914442	ENSBTAG00000048373	.
DMC30	chr14	12471600	15560939	chr14:12471600-12473200/ENSBTAG00000020405	482	-0.741176	.	132132255	chr14	12471600	12473200	chr14:12471600-12473200	.	chr14	15560939	15560940	ENSBTAG00000020405	.
DMC30	chr14	12471600	15914441	chr14:12471600-12473200/ENSBTAG00000048373	447	-0.723529	.	141141255	chr14	12471600	12473200	chr14:12471600-12473200	.	chr14	15914441	15914442	ENSBTAG00000048373	.
DMC31	chr14	16165840	16529200	chr14:16522800-16529200/ENSBTAG00000005585	517	0.758824	.	255123123	chr14	16522800	16529200	chr14:16522800-16529200	.	chr14	16165840	16165841	ENSBTAG00000005585	.
DMC31	chr14	16165840	16961400	chr14:16961000-16961400/ENSBTAG00000005585	664	-0.832353	.	85,85,255	chr14	16961000	16961400	chr14:16961000-16961400	.	chr14	16165840	16165841	ENSBTAG00000005585	.
DMC31	chr14	16228870	16950400	chr14:16948600-16950400/ENSBTAG00000016754	529	0.764706	.	255120120	chr14	16948600	16950400	chr14:16948600-16950400	.	chr14	16228870	16228871	ENSBTAG00000016754	.
DMC31	chr14	16328949	16764000	chr14:16761000-16764000/ENSBTAG00000016194	447	0.723529	.	255141141	chr14	16761000	16764000	chr14:16761000-16764000	.	chr14	16328949	16328950	ENSBTAG00000016194	.
DMC31	chr14	16335278	16387600	chr14:16386200-16387600/ENSBTAG00000049478	564	-0.782353	.	111111255	chr14	16386200	16387600	chr14:16386200-16387600	.	chr14	16335278	16335279	ENSBTAG00000049478	.
DMC31	chr14	16335278	16907000	chr14:16901400-16907000/ENSBTAG00000049478	488	0.744118	.	255130130	chr14	16901400	16907000	chr14:16901400-16907000	.	chr14	16335278	16335279	ENSBTAG00000049478	.
DMC36	chr15	43584066	44190400	chr15:44189000-44190400/ENSBTAG00000013366	570	0.785294	.	255109109	chr15	44189000	44190400	chr15:44189000-44190400	.	chr15	43584066	43584067	ENSBTAG00000013366	.
DMC36	chr15	43608426	44429000	chr15:44427200-44429000/ENSBTAG00000038873	462	0.731425	.	255137137	chr15	44427200	44429000	chr15:44427200-44429000	.	chr15	43608426	43608427	ENSBTAG00000038873	.
DMC36	chr15	43880237	44486600	chr15:44486200-44486600/ENSBTAG00000042335	452	-0.726471	.	139139255	chr15	44486200	44486600	chr15:44486200-44486600	.	chr15	43880237	43880238	ENSBTAG00000042335	.
DMC36	chr15	43910845	44190400	chr15:44189000-44190400/ENSBTAG00000020890	588	0.794118	.	255105105	chr15	44189000	44190400	chr15:44189000-44190400	.	chr15	43910845	43910846	ENSBTAG00000020890	.
DMC36	chr15	43910845	44320400	chr15:44314200-44320400/ENSBTAG00000020890	488	0.744118	.	255130130	chr15	44314200	44320400	chr15:44314200-44320400	.	chr15	43910845	43910846	ENSBTAG00000020890	.
DMC36	chr15	43910845	44341600	chr15:44341400-44341600/ENSBTAG00000020890	470	0.735294	.	255135135	chr15	44341400	44341600	chr15:44341400-44341600	.	chr15	43910845	43910846	ENSBTAG00000020890	.
DMC36	chr15	43910845	44429000	chr15:44427200-44429000/ENSBTAG00000020890	558	0.779412	.	255112112	chr15	44427200	44429000	chr15:44427200-44429000	.	chr15	43910845	43910846	ENSBTAG00000020890	.
DMC36	chr15	43910845	44440400	chr15:44440000-44440400/ENSBTAG00000020890	682	0.841176	.	255,81,81	chr15	44440000	44440400	chr15:44440000-44440400	.	chr15	43910845	43910846	ENSBTAG00000020890	.
DMC36	chr15	43910845	44503400	chr15:44498600-44503400/ENSBTAG00000020890	552	0.776471	.	255114114	chr15	44498600	44503400	chr15:44498600-44503400	.	chr15	43910845	43910846	ENSBTAG00000020890	.
DMC36	chr15	43910845	44528600	chr15:44527000-44528600/ENSBTAG00000020890	558	0.779412	.	255112112	chr15	44527000	44528600	chr15:44527000-44528600	.	chr15	43910845	43910846	ENSBTAG00000020890	.
DMC36	chr15	43974600	44522347	chr15:43974600-43975200/ENSBTAG00000004862	505	0.752941	.	255126126	chr15	43974600	43975200	chr15:43974600-43975200	.	chr15	44522347	44522348	ENSBTAG00000004862	.
DMC38	chr16	50825200	51122449	chr16:50825200-50829200/ENSBTAG00000023784	459	0.729949	.	255137137	chr16	50825200	50829200	chr16:50825200-50829200	.	chr16	51122449	51122450	ENSBTAG00000023784	.
DMC38	chr16	50833281	51289600	chr16:51289400-51289600/ENSBTAG00000024509	516	-0.758115	.	123123255	chr16	51289400	51289600	chr16:51289400-51289600	.	chr16	50833281	50833282	ENSBTAG00000024509	.
DMC38	chr16	50833281	51368000	chr16:51366200-51368000/ENSBTAG00000024509	439	-0.719767	.	143143255	chr16	51366200	51368000	chr16:51366200-51368000	.	chr16	50833281	50833282	ENSBTAG00000024509	.
DMC38	chr16	50867000	51327827	chr16:50867000-50867200/ENSBTAG00000018028	474	-0.737396	.	134134255	chr16	50867000	50867200	chr16:50867000-50867200	.	chr16	51327827	51327828	ENSBTAG00000018028	.
DMC38	chr16	50916200	51079281	chr16:50916200-50917600/ENSBTAG00000046073	429	0.714706	.	255145145	chr16	50916200	50917600	chr16:50916200-50917600	.	chr16	51079281	51079282	ENSBTAG00000046073	.
DMC38	chr16	50916200	51293430	chr16:50916200-50917600/ENSBTAG00000015632	557	-0.778764	.	112112255	chr16	50916200	50917600	chr16:50916200-50917600	.	chr16	51293430	51293431	ENSBTAG00000015632	.
DMC38	chr16	50937583	51166600	chr16:51164400-51166600/ENSBTAG00000000212	511	0.755882	.	255124124	chr16	51164400	51166600	chr16:51164400-51166600	.	chr16	50937583	50937584	ENSBTAG00000000212	.
DMC38	chr16	50937583	51233400	chr16:51229800-51233400/ENSBTAG00000000212	417	-0.708824	.	148148255	chr16	51229800	51233400	chr16:51229800-51233400	.	chr16	50937583	50937584	ENSBTAG00000000212	.
DMC38	chr16	50937583	51302600	chr16:51299400-51302600/ENSBTAG00000000212	594	-0.797059	.	103103255	chr16	51299400	51302600	chr16:51299400-51302600	.	chr16	50937583	50937584	ENSBTAG00000000212	.
DMC38	chr16	50937583	51438000	chr16:51436400-51438000/ENSBTAG00000000212	729	-0.864706	.	69,69,255	chr16	51436400	51438000	chr16:51436400-51438000	.	chr16	50937583	50937584	ENSBTAG00000000212	.
DMC38	chr16	50937583	51445600	chr16:51443800-51445600/ENSBTAG00000000212	623	-0.811765	.	96,96,255	chr16	51443800	51445600	chr16:51443800-51445600	.	chr16	50937583	50937584	ENSBTAG00000000212	.
DMC38	chr16	50993211	51192400	chr16:51192200-51192400/ENSBTAG00000039728	482	-0.741176	.	132132255	chr16	51192200	51192400	chr16:51192200-51192400	.	chr16	50993211	50993212	ENSBTAG00000039728	.
DMC38	chr16	50993211	51233400	chr16:51229800-51233400/ENSBTAG00000039728	464	-0.732353	.	136136255	chr16	51229800	51233400	chr16:51229800-51233400	.	chr16	50993211	50993212	ENSBTAG00000039728	.
DMC38	chr16	50993211	51368000	chr16:51366200-51368000/ENSBTAG00000039728	529	-0.764706	.	120120255	chr16	51366200	51368000	chr16:51366200-51368000	.	chr16	50993211	50993212	ENSBTAG00000039728	.
DMC40	chr16	79632000	80301780	chr16:79632000-79633200/ENSBTAG00000011772	582	0.791176	.	255106106	chr16	79632000	79633200	chr16:79632000-79633200	.	chr16	80301780	80301781	ENSBTAG00000011772	.
DMC40	chr16	79645200	80301780	chr16:79645200-79645800/ENSBTAG00000011772	435	0.717647	.	255144144	chr16	79645200	79645800	chr16:79645200-79645800	.	chr16	80301780	80301781	ENSBTAG00000011772	.
DMC40	chr16	79671600	80301780	chr16:79671600-79671800/ENSBTAG00000011772	482	0.741176	.	255132132	chr16	79671600	79671800	chr16:79671600-79671800	.	chr16	80301780	80301781	ENSBTAG00000011772	.
DMC40	chr16	79677000	80399065	chr16:79677000-79677400/ENSBTAG00000004789	627	0.813834	.	255,95,95	chr16	79677000	79677400	chr16:79677000-79677400	.	chr16	80399065	80399066	ENSBTAG00000004789	.
DMC40	chr16	79688109	80072200	chr16:80072000-80072200/ENSBTAG00000051448	511	-0.755882	.	124124255	chr16	80072000	80072200	chr16:80072000-80072200	.	chr16	79688109	79688110	ENSBTAG00000051448	.
DMC40	chr16	79787223	80237800	chr16:80237600-80237800/ENSBTAG00000046350	486	-0.743017	.	131131255	chr16	80237600	80237800	chr16:80237600-80237800	.	chr16	79787223	79787224	ENSBTAG00000046350	.
DMC40	chr16	79900800	80399065	chr16:79900800-79901200/ENSBTAG00000004789	492	-0.746137	.	129129255	chr16	79900800	79901200	chr16:79900800-79901200	.	chr16	80399065	80399066	ENSBTAG00000004789	.
DMC40	chr16	79900800	80429842	chr16:79900800-79901200/ENSBTAG00000006574	482	-0.741176	.	132132255	chr16	79900800	79901200	chr16:79900800-79901200	.	chr16	80429842	80429843	ENSBTAG00000006574	.
DMC40	chr16	79935600	80301780	chr16:79935600-79935800/ENSBTAG00000011772	588	-0.794118	.	105105255	chr16	79935600	79935800	chr16:79935600-79935800	.	chr16	80301780	80301781	ENSBTAG00000011772	.
DMC40	chr16	79936400	80420337	chr16:79936400-79937200/ENSBTAG00000003016	517	0.758824	.	255123123	chr16	79936400	79937200	chr16:79936400-79937200	.	chr16	80420337	80420338	ENSBTAG00000003016	.
DMC40	chr16	80027600	80420337	chr16:80027600-80028400/ENSBTAG00000003016	641	-0.820588	.	91,91,255	chr16	80027600	80028400	chr16:80027600-80028400	.	chr16	80420337	80420338	ENSBTAG00000003016	.
DMC40	chr16	80027600	80429842	chr16:80027600-80028400/ENSBTAG00000006574	517	0.758824	.	255123123	chr16	80027600	80028400	chr16:80027600-80028400	.	chr16	80429842	80429843	ENSBTAG00000006574	.
DMC41	chr16	79677000	80399065	chr16:79677000-79677400/ENSBTAG00000004789	627	0.813834	.	255,95,95	chr16	79677000	79677400	chr16:79677000-79677400	.	chr16	80399065	80399066	ENSBTAG00000004789	.
DMC41	chr16	79900800	80399065	chr16:79900800-79901200/ENSBTAG00000004789	492	-0.746137	.	129129255	chr16	79900800	79901200	chr16:79900800-79901200	.	chr16	80399065	80399066	ENSBTAG00000004789	.
DMC41	chr16	79900800	80429842	chr16:79900800-79901200/ENSBTAG00000006574	482	-0.741176	.	132132255	chr16	79900800	79901200	chr16:79900800-79901200	.	chr16	80429842	80429843	ENSBTAG00000006574	.
DMC41	chr16	79936400	80420337	chr16:79936400-79937200/ENSBTAG00000003016	517	0.758824	.	255123123	chr16	79936400	79937200	chr16:79936400-79937200	.	chr16	80420337	80420338	ENSBTAG00000003016	.
DMC41	chr16	80027600	80420337	chr16:80027600-80028400/ENSBTAG00000003016	641	-0.820588	.	91,91,255	chr16	80027600	80028400	chr16:80027600-80028400	.	chr16	80420337	80420338	ENSBTAG00000003016	.
DMC41	chr16	80027600	80429842	chr16:80027600-80028400/ENSBTAG00000006574	517	0.758824	.	255123123	chr16	80027600	80028400	chr16:80027600-80028400	.	chr16	80429842	80429843	ENSBTAG00000006574	.
DMC41	chr16	80230800	80420337	chr16:80230800-80231200/ENSBTAG00000003016	517	-0.758824	.	123123255	chr16	80230800	80231200	chr16:80230800-80231200	.	chr16	80420337	80420338	ENSBTAG00000003016	.
DMC41	chr16	80230800	80429842	chr16:80230800-80231200/ENSBTAG00000006574	629	0.814706	.	255,94,94	chr16	80230800	80231200	chr16:80230800-80231200	.	chr16	80429842	80429843	ENSBTAG00000006574	.
DMC41	chr16	80232400	80429842	chr16:80232400-80233200/ENSBTAG00000006574	529	0.764706	.	255120120	chr16	80232400	80233200	chr16:80232400-80233200	.	chr16	80429842	80429843	ENSBTAG00000006574	.
DMC41	chr16	80301780	80328400	chr16:80325000-80328400/ENSBTAG00000011772	423	0.711765	.	255147147	chr16	80325000	80328400	chr16:80325000-80328400	.	chr16	80301780	80301781	ENSBTAG00000011772	.
DMC41	chr16	80301780	80344000	chr16:80337800-80344000/ENSBTAG00000011772	452	0.726471	.	255139139	chr16	80337800	80344000	chr16:80337800-80344000	.	chr16	80301780	80301781	ENSBTAG00000011772	.
DMC41	chr16	80301780	80436400	chr16:80435200-80436400/ENSBTAG00000011772	811	0.905882	.	255,48,48	chr16	80435200	80436400	chr16:80435200-80436400	.	chr16	80301780	80301781	ENSBTAG00000011772	.
DMC41	chr16	80301780	80439600	chr16:80436600-80439600/ENSBTAG00000011772	452	0.726471	.	255139139	chr16	80436600	80439600	chr16:80436600-80439600	.	chr16	80301780	80301781	ENSBTAG00000011772	.
DMC37	chr16	2608815	2736400	chr16:2735000-2736400/ENSBTAG00000045895	464	0.732353	.	255136136	chr16	2735000	2736400	chr16:2735000-2736400	.	chr16	2608815	2608816	ENSBTAG00000045895	.
DMC37	chr16	2608815	2771000	chr16:2770800-2771000/ENSBTAG00000045895	547	0.773529	.	255115115	chr16	2770800	2771000	chr16:2770800-2771000	.	chr16	2608815	2608816	ENSBTAG00000045895	.
DMC37	chr16	2640400	2825767	chr16:2640400-2641200/ENSBTAG00000014645	482	0.741176	.	255132132	chr16	2640400	2641200	chr16:2640400-2641200	.	chr16	2825767	2825768	ENSBTAG00000014645	.
DMC37	chr16	2650600	2825767	chr16:2650600-2654200/ENSBTAG00000014645	488	0.744118	.	255130130	chr16	2650600	2654200	chr16:2650600-2654200	.	chr16	2825767	2825768	ENSBTAG00000014645	.
DMC39	chr16	78582200	79278728	chr16:78582200-78582600/ENSBTAG00000021874	605	-0.802941	.	100100255	chr16	78582200	78582600	chr16:78582200-78582600	.	chr16	79278728	79278729	ENSBTAG00000021874	.
DMC39	chr16	78828931	79388400	chr16:79387600-79388400/ENSBTAG00000009265	580	-0.790287	.	107107255	chr16	79387600	79388400	chr16:79387600-79388400	.	chr16	78828931	78828932	ENSBTAG00000009265	.
DMC43	chr17	64134200	64579462	chr17:64134200-64135000/ENSBTAG00000022039	741	-0.870588	.	66,66,255	chr17	64134200	64135000	chr17:64134200-64135000	.	chr17	64579462	64579463	ENSBTAG00000022039	.
DMC42	chr17	55111455	55639400	chr17:55639200-55639400/ENSBTAG00000052103	552	0.776471	.	255114114	chr17	55639200	55639400	chr17:55639200-55639400	.	chr17	55111455	55111456	ENSBTAG00000052103	.
DMC46	chr18	24961200	25044850	chr18:24961200-24962800/ENSBTAG00000005413	511	0.755882	.	255124124	chr18	24961200	24962800	chr18:24961200-24962800	.	chr18	25044850	25044851	ENSBTAG00000005413	.
DMC54	chr18	65356584	65791200	chr18:65790600-65791200/ENSBTAG00000054370	482	0.741176	.	255132132	chr18	65790600	65791200	chr18:65790600-65791200	.	chr18	65356584	65356585	ENSBTAG00000054370	.
DMC54	chr18	65745802	65809600	chr18:65806800-65809600/ENSBTAG00000051830	658	0.829412	.	255,87,87	chr18	65806800	65809600	chr18:65806800-65809600	.	chr18	65745802	65745803	ENSBTAG00000051830	.
DMC48	chr18	54337816	54473200	chr18:54466400-54473200/ENSBTAG00000037735	500	-0.75	.	127127255	chr18	54466400	54473200	chr18:54466400-54473200	.	chr18	54337816	54337817	ENSBTAG00000037735	.
DMC48	chr18	54337816	54476200	chr18:54474200-54476200/ENSBTAG00000037735	500	-0.75	.	127127255	chr18	54474200	54476200	chr18:54474200-54476200	.	chr18	54337816	54337817	ENSBTAG00000037735	.
DMC49	chr18	55285152	55333000	chr18:55331400-55333000/ENSBTAG00000006757	500	-0.75	.	127127255	chr18	55331400	55333000	chr18:55331400-55333000	.	chr18	55285152	55285153	ENSBTAG00000006757	.
DMC51	chr18	55427200	55530826	chr18:55427200-55427400/ENSBTAG00000013340	470	-0.735294	.	135135255	chr18	55427200	55427400	chr18:55427200-55427400	.	chr18	55530826	55530827	ENSBTAG00000013340	.
DMC45	chr18	13308000	13919854	chr18:13308000-13312200/ENSBTAG00000020943	476	-0.738235	.	133133255	chr18	13308000	13312200	chr18:13308000-13312200	.	chr18	13919854	13919855	ENSBTAG00000020943	.
DMC45	chr18	13414200	13919763	chr18:13414200-13414400/ENSBTAG00000017528	454	-0.727005	.	139139255	chr18	13414200	13414400	chr18:13414200-13414400	.	chr18	13919763	13919764	ENSBTAG00000017528	.
DMC45	chr18	13417400	13900564	chr18:13417400-13417800/ENSBTAG00000012059	423	-0.711765	.	147147255	chr18	13417400	13417800	chr18:13417400-13417800	.	chr18	13900564	13900565	ENSBTAG00000012059	.
DMC45	chr18	13576400	13893147	chr18:13576400-13577400/ENSBTAG00000051907	452	-0.726471	.	139139255	chr18	13576400	13577400	chr18:13576400-13577400	.	chr18	13893147	13893148	ENSBTAG00000051907	.
DMC45	chr18	13593200	14015824	chr18:13593200-13594200/ENSBTAG00000000639	564	-0.782353	.	111111255	chr18	13593200	13594200	chr18:13593200-13594200	.	chr18	14015824	14015825	ENSBTAG00000000639	.
DMC45	chr18	13604600	14015824	chr18:13604600-13608800/ENSBTAG00000000639	541	-0.770588	.	117117255	chr18	13604600	13608800	chr18:13604600-13608800	.	chr18	14015824	14015825	ENSBTAG00000000639	.
DMC45	chr18	13649200	14015824	chr18:13649200-13651400/ENSBTAG00000000639	552	-0.776471	.	114114255	chr18	13649200	13651400	chr18:13649200-13651400	.	chr18	14015824	14015825	ENSBTAG00000000639	.
DMC45	chr18	13658400	14015824	chr18:13658400-13662000/ENSBTAG00000000639	464	-0.732353	.	136136255	chr18	13658400	13662000	chr18:13658400-13662000	.	chr18	14015824	14015825	ENSBTAG00000000639	.
DMC45	chr18	13674600	14015824	chr18:13674600-13675000/ENSBTAG00000000639	441	-0.720588	.	142142255	chr18	13674600	13675000	chr18:13674600-13675000	.	chr18	14015824	14015825	ENSBTAG00000000639	.
DMC45	chr18	13707400	13893147	chr18:13707400-13709800/ENSBTAG00000051907	682	-0.841176	.	81,81,255	chr18	13707400	13709800	chr18:13707400-13709800	.	chr18	13893147	13893148	ENSBTAG00000051907	.
DMC45	chr18	13707400	14015824	chr18:13707400-13709800/ENSBTAG00000000639	670	-0.835294	.	84,84,255	chr18	13707400	13709800	chr18:13707400-13709800	.	chr18	14015824	14015825	ENSBTAG00000000639	.
DMC45	chr18	13741400	13893147	chr18:13741400-13743600/ENSBTAG00000051907	688	-0.844118	.	79,79,255	chr18	13741400	13743600	chr18:13741400-13743600	.	chr18	13893147	13893148	ENSBTAG00000051907	.
DMC45	chr18	13741400	14015824	chr18:13741400-13743600/ENSBTAG00000000639	588	-0.794118	.	105105255	chr18	13741400	13743600	chr18:13741400-13743600	.	chr18	14015824	14015825	ENSBTAG00000000639	.
DMC59	chr19	53326800	53918897	chr19:53326800-53328400/ENSBTAG00000009029	447	-0.723529	.	141141255	chr19	53326800	53328400	chr19:53326800-53328400	.	chr19	53918897	53918898	ENSBTAG00000009029	.
DMC59	chr19	53416674	53931200	chr19:53929600-53931200/ENSBTAG00000001368	711	-0.855882	.	73,73,255	chr19	53929600	53931200	chr19:53929600-53931200	.	chr19	53416674	53416675	ENSBTAG00000001368	.
DMC57	chr19	35328653	35439000	chr19:35438600-35439000/ENSBTAG00000020061	469	-0.734516	.	135135255	chr19	35438600	35439000	chr19:35438600-35439000	.	chr19	35328653	35328654	ENSBTAG00000020061	.
DMC57	chr19	35328653	35718200	chr19:35716800-35718200/ENSBTAG00000020061	504	0.752216	.	255126126	chr19	35716800	35718200	chr19:35716800-35718200	.	chr19	35328653	35328654	ENSBTAG00000020061	.
DMC57	chr19	35328653	35830800	chr19:35819600-35830800/ENSBTAG00000020061	575	0.787614	.	255108108	chr19	35819600	35830800	chr19:35819600-35830800	.	chr19	35328653	35328654	ENSBTAG00000020061	.
DMC57	chr19	35346200	35605444	chr19:35346200-35349400/ENSBTAG00000004651	447	-0.723529	.	141141255	chr19	35346200	35349400	chr19:35346200-35349400	.	chr19	35605444	35605445	ENSBTAG00000004651	.
DMC57	chr19	35346200	35645114	chr19:35346200-35349400/ENSBTAG00000012293	605	0.802941	.	255100100	chr19	35346200	35349400	chr19:35346200-35349400	.	chr19	35645114	35645115	ENSBTAG00000012293	.
DMC56	chr19	11169421	12050200	chr19:12049600-12050200/ENSBTAG00000012070	447	-0.723529	.	141141255	chr19	12049600	12050200	chr19:12049600-12050200	.	chr19	11169421	11169422	ENSBTAG00000012070	.
DMC56	chr19	11169421	12336400	chr19:12334000-12336400/ENSBTAG00000012070	876	0.938235	.	255,31,31	chr19	12334000	12336400	chr19:12334000-12336400	.	chr19	11169421	11169422	ENSBTAG00000012070	.
DMC55	chr19	9182000	9259279	chr19:9182000-9187400/ENSBTAG00000011616	533	0.76674	.	255119119	chr19	9182000	9187400	chr19:9182000-9187400	.	chr19	9259279	9259280	ENSBTAG00000011616	.
DMC55	chr19	9202920	9487400	chr19:9486000-9487400/ENSBTAG00000012780	445	0.722983	.	255141141	chr19	9486000	9487400	chr19:9486000-9487400	.	chr19	9202920	9202921	ENSBTAG00000012780	.
DMC55	chr19	9202920	9591400	chr19:9590000-9591400/ENSBTAG00000012780	460	-0.73039	.	137137255	chr19	9590000	9591400	chr19:9590000-9591400	.	chr19	9202920	9202921	ENSBTAG00000012780	.
DMC55	chr19	9227600	9386860	chr19:9227600-9228000/ENSBTAG00000020119	482	0.741176	.	255132132	chr19	9227600	9228000	chr19:9227600-9228000	.	chr19	9386860	9386861	ENSBTAG00000020119	.
DMC55	chr19	9227600	9470249	chr19:9227600-9228000/ENSBTAG00000015352	441	0.720588	.	255142142	chr19	9227600	9228000	chr19:9227600-9228000	.	chr19	9470249	9470250	ENSBTAG00000015352	.
DMC45	chr19	58020000	59035767	chr19:58020000-58021000/ENSBTAG00000051578	575	0.787568	.	255108108	chr19	58020000	58021000	chr19:58020000-58021000	.	chr19	59035767	59035768	ENSBTAG00000051578	.
DMC61	chr19	58154978	58595200	chr19:58592600-58595200/ENSBTAG00000017136	451	0.725667	.	255139139	chr19	58592600	58595200	chr19:58592600-58595200	.	chr19	58154978	58154979	ENSBTAG00000017136	.
DMC61	chr19	58154978	58654200	chr19:58653400-58654200/ENSBTAG00000017136	587	0.793514	.	255105105	chr19	58653400	58654200	chr19:58653400-58654200	.	chr19	58154978	58154979	ENSBTAG00000017136	.
DMC61	chr19	58154978	58675400	chr19:58675200-58675400/ENSBTAG00000017136	545	0.772865	.	255116116	chr19	58675200	58675400	chr19:58675200-58675400	.	chr19	58154978	58154979	ENSBTAG00000017136	.
DMC61	chr19	58154978	58709000	chr19:58707800-58709000/ENSBTAG00000017136	469	0.734516	.	255135135	chr19	58707800	58709000	chr19:58707800-58709000	.	chr19	58154978	58154979	ENSBTAG00000017136	.
DMC61	chr19	58154978	60198200	chr19:60191600-60198200/ENSBTAG00000017136	699	0.849561	.	255,76,76	chr19	60191600	60198200	chr19:60191600-60198200	.	chr19	58154978	58154979	ENSBTAG00000017136	.
DMC61	chr19	58154978	60245000	chr19:60229600-60245000/ENSBTAG00000017136	539	0.769915	.	255117117	chr19	60229600	60245000	chr19:60229600-60245000	.	chr19	58154978	58154979	ENSBTAG00000017136	.
DMC61	chr19	58154978	60339200	chr19:60338400-60339200/ENSBTAG00000017136	445	0.722717	.	255141141	chr19	60338400	60339200	chr19:60338400-60339200	.	chr19	58154978	58154979	ENSBTAG00000017136	.
DMC61	chr19	58209287	59965200	chr19:59964800-59965200/ENSBTAG00000018837	505	0.752941	.	255126126	chr19	59964800	59965200	chr19:59964800-59965200	.	chr19	58209287	58209288	ENSBTAG00000018837	.
DMC61	chr19	58216400	60652364	chr19:58216400-58216600/ENSBTAG00000024903	581	0.790564	.	255106106	chr19	58216400	58216600	chr19:58216400-58216600	.	chr19	60652364	60652365	ENSBTAG00000024903	.
DMC61	chr19	58260600	59236559	chr19:58260600-58263800/ENSBTAG00000053529	514	0.757128	.	255123123	chr19	58260600	58263800	chr19:58260600-58263800	.	chr19	59236559	59236560	ENSBTAG00000053529	.
DMC61	chr19	58260600	60652364	chr19:58260600-58263800/ENSBTAG00000024903	433	0.716817	.	255144144	chr19	58260600	58263800	chr19:58260600-58263800	.	chr19	60652364	60652365	ENSBTAG00000024903	.
DMC61	chr19	58308200	59236559	chr19:58308200-58308400/ENSBTAG00000053529	677	0.83881	.	255,82,82	chr19	58308200	58308400	chr19:58308200-58308400	.	chr19	59236559	59236560	ENSBTAG00000053529	.
DMC61	chr19	58308200	60652364	chr19:58308200-58308400/ENSBTAG00000024903	433	0.716817	.	255144144	chr19	58308200	58308400	chr19:58308200-58308400	.	chr19	60652364	60652365	ENSBTAG00000024903	.
DMC61	chr19	58317200	59236559	chr19:58317200-58317400/ENSBTAG00000053529	570	0.785403	.	255109109	chr19	58317200	58317400	chr19:58317200-58317400	.	chr19	59236559	59236560	ENSBTAG00000053529	.
DMC61	chr19	58346000	60618841	chr19:58346000-58346200/ENSBTAG00000008294	541	-0.770588	.	117117255	chr19	58346000	58346200	chr19:58346000-58346200	.	chr19	60618841	60618842	ENSBTAG00000008294	.
DMC61	chr19	58458000	60652364	chr19:58458000-58459400/ENSBTAG00000024903	433	0.716817	.	255144144	chr19	58458000	58459400	chr19:58458000-58459400	.	chr19	60652364	60652365	ENSBTAG00000024903	.
DMC61	chr19	58506800	59236559	chr19:58506800-58508600/ENSBTAG00000053529	633	0.816819	.	255,93,93	chr19	58506800	58508600	chr19:58506800-58508600	.	chr19	59236559	59236560	ENSBTAG00000053529	.
DMC61	chr19	58506800	60652364	chr19:58506800-58508600/ENSBTAG00000024903	486	0.743366	.	255131131	chr19	58506800	58508600	chr19:58506800-58508600	.	chr19	60652364	60652365	ENSBTAG00000024903	.
DMC61	chr19	58528879	58595200	chr19:58592600-58595200/ENSBTAG00000055157	447	0.723529	.	255141141	chr19	58592600	58595200	chr19:58592600-58595200	.	chr19	58528879	58528880	ENSBTAG00000055157	.
DMC61	chr19	58528879	58630600	chr19:58629800-58630600/ENSBTAG00000055157	482	0.741176	.	255132132	chr19	58629800	58630600	chr19:58629800-58630600	.	chr19	58528879	58528880	ENSBTAG00000055157	.
DMC61	chr19	58528879	58654200	chr19:58653400-58654200/ENSBTAG00000055157	558	0.779412	.	255112112	chr19	58653400	58654200	chr19:58653400-58654200	.	chr19	58528879	58528880	ENSBTAG00000055157	.
DMC61	chr19	58528879	58675000	chr19:58673600-58675000/ENSBTAG00000055157	694	0.847059	.	255,78,78	chr19	58673600	58675000	chr19:58673600-58675000	.	chr19	58528879	58528880	ENSBTAG00000055157	.
DMC61	chr19	58528879	58675400	chr19:58675200-58675400/ENSBTAG00000055157	494	0.747059	.	255129129	chr19	58675200	58675400	chr19:58675200-58675400	.	chr19	58528879	58528880	ENSBTAG00000055157	.
DMC61	chr19	58528879	58709000	chr19:58707800-58709000/ENSBTAG00000055157	629	0.814706	.	255,94,94	chr19	58707800	58709000	chr19:58707800-58709000	.	chr19	58528879	58528880	ENSBTAG00000055157	.
DMC61	chr19	58528879	58714000	chr19:58713600-58714000/ENSBTAG00000055157	570	0.785294	.	255109109	chr19	58713600	58714000	chr19:58713600-58714000	.	chr19	58528879	58528880	ENSBTAG00000055157	.
DMC61	chr19	58528879	58859600	chr19:58859400-58859600/ENSBTAG00000055157	435	0.717647	.	255144144	chr19	58859400	58859600	chr19:58859400-58859600	.	chr19	58528879	58528880	ENSBTAG00000055157	.
DMC61	chr19	58528879	58879800	chr19:58879400-58879800/ENSBTAG00000055157	511	0.755882	.	255124124	chr19	58879400	58879800	chr19:58879400-58879800	.	chr19	58528879	58528880	ENSBTAG00000055157	.
DMC61	chr19	58528879	59242200	chr19:59241400-59242200/ENSBTAG00000055157	788	0.894118	.	255,54,54	chr19	59241400	59242200	chr19:59241400-59242200	.	chr19	58528879	58528880	ENSBTAG00000055157	.
DMC61	chr19	58528879	59989000	chr19:59988400-59989000/ENSBTAG00000055157	652	0.826471	.	255,88,88	chr19	59988400	59989000	chr19:59988400-59989000	.	chr19	58528879	58528880	ENSBTAG00000055157	.
DMC61	chr19	58528879	60198200	chr19:60191600-60198200/ENSBTAG00000055157	629	0.814706	.	255,94,94	chr19	60191600	60198200	chr19:60191600-60198200	.	chr19	58528879	58528880	ENSBTAG00000055157	.
DMC61	chr19	58528879	60210800	chr19:60207000-60210800/ENSBTAG00000055157	500	0.75	.	255127127	chr19	60207000	60210800	chr19:60207000-60210800	.	chr19	58528879	58528880	ENSBTAG00000055157	.
DMC61	chr19	58528879	60245000	chr19:60229600-60245000/ENSBTAG00000055157	723	0.861765	.	255,70,70	chr19	60229600	60245000	chr19:60229600-60245000	.	chr19	58528879	58528880	ENSBTAG00000055157	.
DMC61	chr19	58528879	60312600	chr19:60308400-60312600/ENSBTAG00000055157	458	0.729412	.	255138138	chr19	60308400	60312600	chr19:60308400-60312600	.	chr19	58528879	58528880	ENSBTAG00000055157	.
DMC61	chr19	58528879	60339200	chr19:60338400-60339200/ENSBTAG00000055157	858	0.929412	.	255,36,36	chr19	60338400	60339200	chr19:60338400-60339200	.	chr19	58528879	58528880	ENSBTAG00000055157	.
DMC61	chr19	58528879	60355600	chr19:60355000-60355600/ENSBTAG00000055157	488	0.744118	.	255130130	chr19	60355000	60355600	chr19:60355000-60355600	.	chr19	58528879	58528880	ENSBTAG00000055157	.
DMC61	chr19	58528879	60578400	chr19:60577600-60578400/ENSBTAG00000055157	599	0.8	.	255102102	chr19	60577600	60578400	chr19:60577600-60578400	.	chr19	58528879	58528880	ENSBTAG00000055157	.
DMC61	chr19	58528879	60629000	chr19:60627400-60629000/ENSBTAG00000055157	500	0.75	.	255127127	chr19	60627400	60629000	chr19:60627400-60629000	.	chr19	58528879	58528880	ENSBTAG00000055157	.
DMC61	chr19	58575000	58923174	chr19:58575000-58575200/ENSBTAG00000045824	748	0.874172	.	255,64,64	chr19	58575000	58575200	chr19:58575000-58575200	.	chr19	58923174	58923175	ENSBTAG00000045824	.
DMC61	chr19	58585200	59236559	chr19:58585200-58585600/ENSBTAG00000053529	743	0.871797	.	255,65,65	chr19	58585200	58585600	chr19:58585200-58585600	.	chr19	59236559	59236560	ENSBTAG00000053529	.
DMC62	chr19	60846600	61357428	chr19:60846600-60847200/ENSBTAG00000049286	482	-0.741176	.	132132255	chr19	60846600	60847200	chr19:60846600-60847200	.	chr19	61357428	61357429	ENSBTAG00000049286	.
DMC63	chr2	106699000	107443938	chr2:106699000-106701000/ENSBTAG00000020537	743	0.87197	.	255,65,65	chr2	106699000	106701000	chr2:106699000-106701000	.	chr2	107443938	107443939	ENSBTAG00000020537	.
DMC63	chr2	106807000	107501784	chr2:106807000-106807800/ENSBTAG00000009972	617	0.808824	.	255,97,97	chr2	106807000	106807800	chr2:106807000-106807800	.	chr2	107501784	107501785	ENSBTAG00000009972	.
DMC63	chr2	106807000	107521189	chr2:106807000-106807800/ENSBTAG00000038992	505	-0.752941	.	126126255	chr2	106807000	106807800	chr2:106807000-106807800	.	chr2	107521189	107521190	ENSBTAG00000038992	.
DMC63	chr2	106869600	107501784	chr2:106869600-106870800/ENSBTAG00000009972	888	0.944118	.	255,28,28	chr2	106869600	106870800	chr2:106869600-106870800	.	chr2	107501784	107501785	ENSBTAG00000009972	.
DMC63	chr2	106899057	107457000	chr2:107455400-107457000/ENSBTAG00000031052	419	0.709727	.	255148148	chr2	107455400	107457000	chr2:107455400-107457000	.	chr2	106899057	106899058	ENSBTAG00000031052	.
DMC63	chr2	106899057	107470000	chr2:107469600-107470000/ENSBTAG00000031052	571	0.785769	.	255109109	chr2	107469600	107470000	chr2:107469600-107470000	.	chr2	106899057	106899058	ENSBTAG00000031052	.
DMC63	chr2	106924600	107501784	chr2:106924600-106926400/ENSBTAG00000009972	558	0.779412	.	255112112	chr2	106924600	106926400	chr2:106924600-106926400	.	chr2	107501784	107501785	ENSBTAG00000009972	.
DMC63	chr2	106924600	107521189	chr2:106924600-106926400/ENSBTAG00000038992	582	-0.791176	.	106106255	chr2	106924600	106926400	chr2:106924600-106926400	.	chr2	107521189	107521190	ENSBTAG00000038992	.
DMC63	chr2	107120309	107457000	chr2:107455400-107457000/ENSBTAG00000012618	588	-0.794118	.	105105255	chr2	107455400	107457000	chr2:107455400-107457000	.	chr2	107120309	107120310	ENSBTAG00000012618	.
DMC63	chr2	107179679	107440000	chr2:107438400-107440000/ENSBTAG00000020608	611	0.805882	.	255,99,99	chr2	107438400	107440000	chr2:107438400-107440000	.	chr2	107179679	107179680	ENSBTAG00000020608	.
DMC63	chr2	107179679	107452400	chr2:107451000-107452400/ENSBTAG00000020608	541	0.770588	.	255117117	chr2	107451000	107452400	chr2:107451000-107452400	.	chr2	107179679	107179680	ENSBTAG00000020608	.
DMC63	chr2	107276428	107457000	chr2:107455400-107457000/ENSBTAG00000010897	539	0.769684	.	255117117	chr2	107455400	107457000	chr2:107455400-107457000	.	chr2	107276428	107276429	ENSBTAG00000010897	.
DMC63	chr2	107276428	107470000	chr2:107469600-107470000/ENSBTAG00000010897	598	0.799117	.	255102102	chr2	107469600	107470000	chr2:107469600-107470000	.	chr2	107276428	107276429	ENSBTAG00000010897	.
DMC63	chr2	107323200	107443938	chr2:107323200-107332800/ENSBTAG00000020537	614	-0.807493	.	98,98,255	chr2	107323200	107332800	chr2:107323200-107332800	.	chr2	107443938	107443939	ENSBTAG00000020537	.
DMC63	chr2	107333600	107443938	chr2:107333600-107339000/ENSBTAG00000020537	565	-0.782931	.	110110255	chr2	107333600	107339000	chr2:107333600-107339000	.	chr2	107443938	107443939	ENSBTAG00000020537	.
DMC63	chr2	107365755	107440000	chr2:107438400-107440000/ENSBTAG00000046176	776	0.888235	.	255,57,57	chr2	107438400	107440000	chr2:107438400-107440000	.	chr2	107365755	107365756	ENSBTAG00000046176	.
DMC63	chr2	107365755	107452400	chr2:107451000-107452400/ENSBTAG00000046176	694	0.847059	.	255,78,78	chr2	107451000	107452400	chr2:107451000-107452400	.	chr2	107365755	107365756	ENSBTAG00000046176	.
DMC63	chr2	107365755	107457000	chr2:107455400-107457000/ENSBTAG00000046176	505	0.752941	.	255126126	chr2	107455400	107457000	chr2:107455400-107457000	.	chr2	107365755	107365756	ENSBTAG00000046176	.
DMC63	chr2	107365755	107458400	chr2:107458200-107458400/ENSBTAG00000046176	464	0.732353	.	255136136	chr2	107458200	107458400	chr2:107458200-107458400	.	chr2	107365755	107365756	ENSBTAG00000046176	.
DMC63	chr2	107365755	107481400	chr2:107479000-107481400/ENSBTAG00000046176	558	0.779412	.	255112112	chr2	107479000	107481400	chr2:107479000-107481400	.	chr2	107365755	107365756	ENSBTAG00000046176	.
DMC63	chr2	107372000	107501784	chr2:107372000-107382400/ENSBTAG00000009972	547	0.773529	.	255115115	chr2	107372000	107382400	chr2:107372000-107382400	.	chr2	107501784	107501785	ENSBTAG00000009972	.
DMC63	chr2	107390400	107501784	chr2:107390400-107392600/ENSBTAG00000009972	470	0.735294	.	255135135	chr2	107390400	107392600	chr2:107390400-107392600	.	chr2	107501784	107501785	ENSBTAG00000009972	.
DMC64	chr20	42082200	51049217	chr20:42082200-42083000/ENSBTAG00000025893	780	-0.890392	.	56,56,255	chr20	42082200	42083000	chr20:42082200-42083000	.	chr20	51049217	51049218	ENSBTAG00000025893	.
DMC64	chr20	42354761	50983400	chr20:50983000-50983400/ENSBTAG00000012992	605	-0.802941	.	100100255	chr20	50983000	50983400	chr20:50983000-50983400	.	chr20	42354761	42354762	ENSBTAG00000012992	.
DMC64	chr20	46626435	48922200	chr20:48921400-48922200/ENSBTAG00000051934	448	0.724141	.	255140140	chr20	48921400	48922200	chr20:48921400-48922200	.	chr20	46626435	46626436	ENSBTAG00000051934	.
DMC64	chr20	46730846	48888400	chr20:48888200-48888400/ENSBTAG00000018234	422	0.711192	.	255147147	chr20	48888200	48888400	chr20:48888200-48888400	.	chr20	46730846	46730847	ENSBTAG00000018234	.
DMC64	chr20	46730846	48922200	chr20:48921400-48922200/ENSBTAG00000018234	491	0.745921	.	255129129	chr20	48921400	48922200	chr20:48921400-48922200	.	chr20	46730846	46730847	ENSBTAG00000018234	.
DMC65	chr20	66616744	68122600	chr20:68121200-68122600/ENSBTAG00000043282	511	-0.755882	.	124124255	chr20	68121200	68122600	chr20:68121200-68122600	.	chr20	66616744	66616745	ENSBTAG00000043282	.
DMC65	chr20	66751048	67719200	chr20:67719000-67719200/ENSBTAG00000048851	470	0.735294	.	255135135	chr20	67719000	67719200	chr20:67719000-67719200	.	chr20	66751048	66751049	ENSBTAG00000048851	.
DMC65	chr20	66751048	67774200	chr20:67773000-67774200/ENSBTAG00000048851	523	0.761765	.	255121121	chr20	67773000	67774200	chr20:67773000-67774200	.	chr20	66751048	66751049	ENSBTAG00000048851	.
DMC65	chr20	66751048	67922800	chr20:67920600-67922800/ENSBTAG00000048851	476	0.738235	.	255133133	chr20	67920600	67922800	chr20:67920600-67922800	.	chr20	66751048	66751049	ENSBTAG00000048851	.
DMC65	chr20	66751048	68217400	chr20:68215200-68217400/ENSBTAG00000048851	470	0.735294	.	255135135	chr20	68215200	68217400	chr20:68215200-68217400	.	chr20	66751048	66751049	ENSBTAG00000048851	.
DMC66	chr21	9926800	10698748	chr21:9926800-9927600/ENSBTAG00000049981	464	-0.732353	.	136136255	chr21	9926800	9927600	chr21:9926800-9927600	.	chr21	10698748	10698749	ENSBTAG00000049981	.
DMC66	chr21	9926800	12855267	chr21:9926800-9927600/ENSBTAG00000013689	617	-0.808824	.	97,97,255	chr21	9926800	9927600	chr21:9926800-9927600	.	chr21	12855267	12855268	ENSBTAG00000013689	.
DMC66	chr21	10491400	12855267	chr21:10491400-10494400/ENSBTAG00000013689	488	-0.744118	.	130130255	chr21	10491400	10494400	chr21:10491400-10494400	.	chr21	12855267	12855268	ENSBTAG00000013689	.
DMC73	chr22	58040295	58417000	chr22:58416800-58417000/ENSBTAG00000007362	458	-0.729412	.	138138255	chr22	58416800	58417000	chr22:58416800-58417000	.	chr22	58040295	58040296	ENSBTAG00000007362	.
DMC73	chr22	58357000	58398286	chr22:58357000-58358600/ENSBTAG00000004014	594	0.797059	.	255103103	chr22	58357000	58358600	chr22:58357000-58358600	.	chr22	58398286	58398287	ENSBTAG00000004014	.
DMC76	chr23	43050452	43296400	chr23:43294000-43296400/ENSBTAG00000014904	452	0.726471	.	255139139	chr23	43294000	43296400	chr23:43294000-43296400	.	chr23	43050452	43050453	ENSBTAG00000014904	.
DMC76	chr23	43050452	44332200	chr23:44331000-44332200/ENSBTAG00000014904	599	-0.8	.	102102255	chr23	44331000	44332200	chr23:44331000-44332200	.	chr23	43050452	43050453	ENSBTAG00000014904	.
DMC76	chr23	43050452	44456200	chr23:44453000-44456200/ENSBTAG00000014904	511	-0.755882	.	124124255	chr23	44453000	44456200	chr23:44453000-44456200	.	chr23	43050452	43050453	ENSBTAG00000014904	.
DMC76	chr23	43050452	44476000	chr23:44475000-44476000/ENSBTAG00000014904	582	-0.791176	.	106106255	chr23	44475000	44476000	chr23:44475000-44476000	.	chr23	43050452	43050453	ENSBTAG00000014904	.
DMC76	chr23	43050452	44504400	chr23:44498400-44504400/ENSBTAG00000014904	500	-0.75	.	127127255	chr23	44498400	44504400	chr23:44498400-44504400	.	chr23	43050452	43050453	ENSBTAG00000014904	.
DMC76	chr23	43077484	43276600	chr23:43275400-43276600/ENSBTAG00000048652	436	0.718454	.	255143143	chr23	43275400	43276600	chr23:43275400-43276600	.	chr23	43077484	43077485	ENSBTAG00000048652	.
DMC76	chr23	43077484	43296400	chr23:43294000-43296400/ENSBTAG00000048652	486	0.743017	.	255131131	chr23	43294000	43296400	chr23:43294000-43296400	.	chr23	43077484	43077485	ENSBTAG00000048652	.
DMC76	chr23	43077484	43411800	chr23:43410000-43411800/ENSBTAG00000048652	541	0.77065	.	255117117	chr23	43410000	43411800	chr23:43410000-43411800	.	chr23	43077484	43077485	ENSBTAG00000048652	.
DMC76	chr23	43077484	43414800	chr23:43414000-43414800/ENSBTAG00000048652	676	0.838197	.	255,82,82	chr23	43414000	43414800	chr23:43414000-43414800	.	chr23	43077484	43077485	ENSBTAG00000048652	.
DMC76	chr23	43077484	43612200	chr23:43611800-43612200/ENSBTAG00000048652	676	0.838197	.	255,82,82	chr23	43611800	43612200	chr23:43611800-43612200	.	chr23	43077484	43077485	ENSBTAG00000048652	.
DMC79	chr24	2973404	4158600	chr24:4152200-4158600/ENSBTAG00000054593	516	0.758293	.	255123123	chr24	4152200	4158600	chr24:4152200-4158600	.	chr24	2973404	2973405	ENSBTAG00000054593	.
DMC79	chr24	2973404	4189600	chr24:4187000-4189600/ENSBTAG00000054593	504	0.752323	.	255126126	chr24	4187000	4189600	chr24:4187000-4189600	.	chr24	2973404	2973405	ENSBTAG00000054593	.
DMC79	chr24	3115600	4015956	chr24:3115600-3116400/ENSBTAG00000009841	552	-0.776471	.	114114255	chr24	3115600	3116400	chr24:3115600-3116400	.	chr24	4015956	4015957	ENSBTAG00000009841	.
DMC79	chr24	3185400	4141580	chr24:3185400-3186200/ENSBTAG00000012012	476	0.738235	.	255133133	chr24	3185400	3186200	chr24:3185400-3186200	.	chr24	4141580	4141581	ENSBTAG00000012012	.
DMC81	chr25	3790400	3841534	chr25:3790400-3791000/ENSBTAG00000037566	505	0.752941	.	255126126	chr25	3790400	3791000	chr25:3790400-3791000	.	chr25	3841534	3841535	ENSBTAG00000037566	.
DMC81	chr25	3790400	3996463	chr25:3790400-3791000/ENSBTAG00000002178	417	-0.708824	.	148148255	chr25	3790400	3791000	chr25:3790400-3791000	.	chr25	3996463	3996464	ENSBTAG00000002178	.
DMC81	chr25	3802893	4030800	chr25:4028600-4030800/ENSBTAG00000006590	617	-0.808824	.	97,97,255	chr25	4028600	4030800	chr25:4028600-4030800	.	chr25	3802893	3802894	ENSBTAG00000006590	.
DMC84	chr25	35813000	35959426	chr25:35813000-35813200/ENSBTAG00000020528	482	0.741176	.	255132132	chr25	35813000	35813200	chr25:35813000-35813200	.	chr25	35959426	35959427	ENSBTAG00000020528	.
DMC89	chr26	48056600	50671512	chr26:48056600-48056800/ENSBTAG00000011092	451	0.725712	.	255139139	chr26	48056600	48056800	chr26:48056600-48056800	.	chr26	50671512	50671513	ENSBTAG00000011092	.
DMC89	chr26	48293600	50822833	chr26:48293600-48300400/ENSBTAG00000019919	462	-0.731425	.	137137255	chr26	48293600	48300400	chr26:48293600-48300400	.	chr26	50822833	50822834	ENSBTAG00000019919	.
DMC89	chr26	48304400	50822833	chr26:48304400-48304800/ENSBTAG00000019919	546	-0.77322	.	115115255	chr26	48304400	48304800	chr26:48304400-48304800	.	chr26	50822833	50822834	ENSBTAG00000019919	.
DMC89	chr26	48404200	50671512	chr26:48404200-48404400/ENSBTAG00000011092	467	-0.733566	.	135135255	chr26	48404200	48404400	chr26:48404200-48404400	.	chr26	50671512	50671513	ENSBTAG00000011092	.
DMC89	chr26	48862200	50822833	chr26:48862200-48864400/ENSBTAG00000019919	474	-0.737396	.	134134255	chr26	48862200	48864400	chr26:48862200-48864400	.	chr26	50822833	50822834	ENSBTAG00000019919	.
DMC89	chr26	48862200	50934247	chr26:48862200-48864400/ENSBTAG00000054665	419	-0.709783	.	148148255	chr26	48862200	48864400	chr26:48862200-48864400	.	chr26	50934247	50934248	ENSBTAG00000054665	.
DMC89	chr26	49027200	50723720	chr26:49027200-49028000/ENSBTAG00000005965	421	0.710918	.	255147147	chr26	49027200	49028000	chr26:49027200-49028000	.	chr26	50723720	50723721	ENSBTAG00000005965	.
DMC89	chr26	49027200	50904505	chr26:49027200-49028000/ENSBTAG00000015651	517	0.758824	.	255123123	chr26	49027200	49028000	chr26:49027200-49028000	.	chr26	50904505	50904506	ENSBTAG00000015651	.
DMC89	chr26	49027200	50934247	chr26:49027200-49028000/ENSBTAG00000054665	477	0.738952	.	255133133	chr26	49027200	49028000	chr26:49027200-49028000	.	chr26	50934247	50934248	ENSBTAG00000054665	.
DMC89	chr26	49202600	51083088	chr26:49202600-49204400/ENSBTAG00000009181	470	0.735294	.	255135135	chr26	49202600	49204400	chr26:49202600-49204400	.	chr26	51083088	51083089	ENSBTAG00000009181	.
DMC89	chr26	49249800	51083088	chr26:49249800-49252400/ENSBTAG00000009181	441	0.720588	.	255142142	chr26	49249800	49252400	chr26:49249800-49252400	.	chr26	51083088	51083089	ENSBTAG00000009181	.
DMC89	chr26	49268000	51083088	chr26:49268000-49268200/ENSBTAG00000009181	570	0.785294	.	255109109	chr26	49268000	49268200	chr26:49268000-49268200	.	chr26	51083088	51083089	ENSBTAG00000009181	.
DMC89	chr26	49271953	49278000	chr26:49274600-49278000/ENSBTAG00000008272	623	0.811765	.	255,96,96	chr26	49274600	49278000	chr26:49274600-49278000	.	chr26	49271953	49271954	ENSBTAG00000008272	.
DMC89	chr26	49274600	51083088	chr26:49274600-49278000/ENSBTAG00000009181	564	0.782353	.	255111111	chr26	49274600	49278000	chr26:49274600-49278000	.	chr26	51083088	51083089	ENSBTAG00000009181	.
DMC90	chr26	48056600	50671512	chr26:48056600-48056800/ENSBTAG00000011092	451	0.725712	.	255139139	chr26	48056600	48056800	chr26:48056600-48056800	.	chr26	50671512	50671513	ENSBTAG00000011092	.
DMC90	chr26	48293600	50822833	chr26:48293600-48300400/ENSBTAG00000019919	462	-0.731425	.	137137255	chr26	48293600	48300400	chr26:48293600-48300400	.	chr26	50822833	50822834	ENSBTAG00000019919	.
DMC90	chr26	48304400	50822833	chr26:48304400-48304800/ENSBTAG00000019919	546	-0.77322	.	115115255	chr26	48304400	48304800	chr26:48304400-48304800	.	chr26	50822833	50822834	ENSBTAG00000019919	.
DMC90	chr26	48404200	50671512	chr26:48404200-48404400/ENSBTAG00000011092	467	-0.733566	.	135135255	chr26	48404200	48404400	chr26:48404200-48404400	.	chr26	50671512	50671513	ENSBTAG00000011092	.
DMC90	chr26	48862200	50822833	chr26:48862200-48864400/ENSBTAG00000019919	474	-0.737396	.	134134255	chr26	48862200	48864400	chr26:48862200-48864400	.	chr26	50822833	50822834	ENSBTAG00000019919	.
DMC90	chr26	48862200	50934247	chr26:48862200-48864400/ENSBTAG00000054665	419	-0.709783	.	148148255	chr26	48862200	48864400	chr26:48862200-48864400	.	chr26	50934247	50934248	ENSBTAG00000054665	.
DMC90	chr26	49027200	50723720	chr26:49027200-49028000/ENSBTAG00000005965	421	0.710918	.	255147147	chr26	49027200	49028000	chr26:49027200-49028000	.	chr26	50723720	50723721	ENSBTAG00000005965	.
DMC90	chr26	49027200	50904505	chr26:49027200-49028000/ENSBTAG00000015651	517	0.758824	.	255123123	chr26	49027200	49028000	chr26:49027200-49028000	.	chr26	50904505	50904506	ENSBTAG00000015651	.
DMC90	chr26	49027200	50934247	chr26:49027200-49028000/ENSBTAG00000054665	477	0.738952	.	255133133	chr26	49027200	49028000	chr26:49027200-49028000	.	chr26	50934247	50934248	ENSBTAG00000054665	.
DMC90	chr26	49202600	51083088	chr26:49202600-49204400/ENSBTAG00000009181	470	0.735294	.	255135135	chr26	49202600	49204400	chr26:49202600-49204400	.	chr26	51083088	51083089	ENSBTAG00000009181	.
DMC90	chr26	49249800	51083088	chr26:49249800-49252400/ENSBTAG00000009181	441	0.720588	.	255142142	chr26	49249800	49252400	chr26:49249800-49252400	.	chr26	51083088	51083089	ENSBTAG00000009181	.
DMC90	chr26	49268000	51083088	chr26:49268000-49268200/ENSBTAG00000009181	570	0.785294	.	255109109	chr26	49268000	49268200	chr26:49268000-49268200	.	chr26	51083088	51083089	ENSBTAG00000009181	.
DMC90	chr26	49271953	49278000	chr26:49274600-49278000/ENSBTAG00000008272	623	0.811765	.	255,96,96	chr26	49274600	49278000	chr26:49274600-49278000	.	chr26	49271953	49271954	ENSBTAG00000008272	.
DMC90	chr26	49274600	51083088	chr26:49274600-49278000/ENSBTAG00000009181	564	0.782353	.	255111111	chr26	49274600	49278000	chr26:49274600-49278000	.	chr26	51083088	51083089	ENSBTAG00000009181	.
DMC91	chr26	48862200	50934247	chr26:48862200-48864400/ENSBTAG00000054665	419	-0.709783	.	148148255	chr26	48862200	48864400	chr26:48862200-48864400	.	chr26	50934247	50934248	ENSBTAG00000054665	.
DMC91	chr26	49027200	50934247	chr26:49027200-49028000/ENSBTAG00000054665	477	0.738952	.	255133133	chr26	49027200	49028000	chr26:49027200-49028000	.	chr26	50934247	50934248	ENSBTAG00000054665	.
DMC91	chr26	49202600	51083088	chr26:49202600-49204400/ENSBTAG00000009181	470	0.735294	.	255135135	chr26	49202600	49204400	chr26:49202600-49204400	.	chr26	51083088	51083089	ENSBTAG00000009181	.
DMC91	chr26	49249800	51083088	chr26:49249800-49252400/ENSBTAG00000009181	441	0.720588	.	255142142	chr26	49249800	49252400	chr26:49249800-49252400	.	chr26	51083088	51083089	ENSBTAG00000009181	.
DMC91	chr26	49268000	51083088	chr26:49268000-49268200/ENSBTAG00000009181	570	0.785294	.	255109109	chr26	49268000	49268200	chr26:49268000-49268200	.	chr26	51083088	51083089	ENSBTAG00000009181	.
DMC91	chr26	49274600	51083088	chr26:49274600-49278000/ENSBTAG00000009181	564	0.782353	.	255111111	chr26	49274600	49278000	chr26:49274600-49278000	.	chr26	51083088	51083089	ENSBTAG00000009181	.
DMC91	chr26	49278800	51083088	chr26:49278800-49280600/ENSBTAG00000009181	682	0.841176	.	255,81,81	chr26	49278800	49280600	chr26:49278800-49280600	.	chr26	51083088	51083089	ENSBTAG00000009181	.
DMC91	chr26	49431600	51083088	chr26:49431600-49433800/ENSBTAG00000009181	688	0.844118	.	255,79,79	chr26	49431600	49433800	chr26:49431600-49433800	.	chr26	51083088	51083089	ENSBTAG00000009181	.
DMC91	chr26	50201800	51083088	chr26:50201800-50202800/ENSBTAG00000009181	723	-0.861765	.	70,70,255	chr26	50201800	50202800	chr26:50201800-50202800	.	chr26	51083088	51083089	ENSBTAG00000009181	.
DMC91	chr26	50671512	50946600	chr26:50945800-50946600/ENSBTAG00000011092	687	0.843523	.	255,79,79	chr26	50945800	50946600	chr26:50945800-50946600	.	chr26	50671512	50671513	ENSBTAG00000011092	.
DMC91	chr26	50671512	50948800	chr26:50948000-50948800/ENSBTAG00000011092	492	0.746133	.	255129129	chr26	50948000	50948800	chr26:50948000-50948800	.	chr26	50671512	50671513	ENSBTAG00000011092	.
DMC91	chr26	50671512	50953800	chr26:50953000-50953800/ENSBTAG00000011092	611	0.805823	.	255,99,99	chr26	50953000	50953800	chr26:50953000-50953800	.	chr26	50671512	50671513	ENSBTAG00000011092	.
DMC91	chr26	50671512	50988000	chr26:50987800-50988000/ENSBTAG00000011092	540	0.770261	.	255117117	chr26	50987800	50988000	chr26:50987800-50988000	.	chr26	50671512	50671513	ENSBTAG00000011092	.
DMC91	chr26	50671512	51017800	chr26:51004200-51017800/ENSBTAG00000011092	558	0.77912	.	255112112	chr26	51004200	51017800	chr26:51004200-51017800	.	chr26	50671512	50671513	ENSBTAG00000011092	.
DMC91	chr26	50698600	51083088	chr26:50698600-50699600/ENSBTAG00000009181	552	0.776471	.	255114114	chr26	50698600	50699600	chr26:50698600-50699600	.	chr26	51083088	51083089	ENSBTAG00000009181	.
DMC91	chr26	50723720	50946600	chr26:50945800-50946600/ENSBTAG00000005965	563	0.781714	.	255111111	chr26	50945800	50946600	chr26:50945800-50946600	.	chr26	50723720	50723721	ENSBTAG00000005965	.
DMC91	chr26	50723720	50988000	chr26:50987800-50988000/ENSBTAG00000005965	552	0.776386	.	255114114	chr26	50987800	50988000	chr26:50987800-50988000	.	chr26	50723720	50723721	ENSBTAG00000005965	.
DMC91	chr26	50822833	50986000	chr26:50985400-50986000/ENSBTAG00000019919	510	0.755308	.	255124124	chr26	50985400	50986000	chr26:50985400-50986000	.	chr26	50822833	50822834	ENSBTAG00000019919	.
DMC91	chr26	50893600	51083088	chr26:50893600-50895800/ENSBTAG00000009181	547	0.773529	.	255115115	chr26	50893600	50895800	chr26:50893600-50895800	.	chr26	51083088	51083089	ENSBTAG00000009181	.
DMC87	chr26	48004600	49271953	chr26:48004600-48005000/ENSBTAG00000008272	505	0.752941	.	255126126	chr26	48004600	48005000	chr26:48004600-48005000	.	chr26	49271953	49271954	ENSBTAG00000008272	.
DMC87	chr26	48027800	49271953	chr26:48027800-48028000/ENSBTAG00000008272	435	0.717647	.	255144144	chr26	48027800	48028000	chr26:48027800-48028000	.	chr26	49271953	49271954	ENSBTAG00000008272	.
DMC87	chr26	48056600	50671512	chr26:48056600-48056800/ENSBTAG00000011092	451	0.725712	.	255139139	chr26	48056600	48056800	chr26:48056600-48056800	.	chr26	50671512	50671513	ENSBTAG00000011092	.
DMC87	chr26	48205200	49271953	chr26:48205200-48206400/ENSBTAG00000008272	582	0.791176	.	255106106	chr26	48205200	48206400	chr26:48205200-48206400	.	chr26	49271953	49271954	ENSBTAG00000008272	.
DMC87	chr26	48293600	50822833	chr26:48293600-48300400/ENSBTAG00000019919	462	-0.731425	.	137137255	chr26	48293600	48300400	chr26:48293600-48300400	.	chr26	50822833	50822834	ENSBTAG00000019919	.
DMC87	chr26	48304400	50822833	chr26:48304400-48304800/ENSBTAG00000019919	546	-0.77322	.	115115255	chr26	48304400	48304800	chr26:48304400-48304800	.	chr26	50822833	50822834	ENSBTAG00000019919	.
DMC88	chr26	48004600	49271953	chr26:48004600-48005000/ENSBTAG00000008272	505	0.752941	.	255126126	chr26	48004600	48005000	chr26:48004600-48005000	.	chr26	49271953	49271954	ENSBTAG00000008272	.
DMC88	chr26	48027800	49271953	chr26:48027800-48028000/ENSBTAG00000008272	435	0.717647	.	255144144	chr26	48027800	48028000	chr26:48027800-48028000	.	chr26	49271953	49271954	ENSBTAG00000008272	.
DMC88	chr26	48056600	50671512	chr26:48056600-48056800/ENSBTAG00000011092	451	0.725712	.	255139139	chr26	48056600	48056800	chr26:48056600-48056800	.	chr26	50671512	50671513	ENSBTAG00000011092	.
DMC88	chr26	48205200	49271953	chr26:48205200-48206400/ENSBTAG00000008272	582	0.791176	.	255106106	chr26	48205200	48206400	chr26:48205200-48206400	.	chr26	49271953	49271954	ENSBTAG00000008272	.
DMC88	chr26	48293600	50822833	chr26:48293600-48300400/ENSBTAG00000019919	462	-0.731425	.	137137255	chr26	48293600	48300400	chr26:48293600-48300400	.	chr26	50822833	50822834	ENSBTAG00000019919	.
DMC88	chr26	48304400	50822833	chr26:48304400-48304800/ENSBTAG00000019919	546	-0.77322	.	115115255	chr26	48304400	48304800	chr26:48304400-48304800	.	chr26	50822833	50822834	ENSBTAG00000019919	.
DMC88	chr26	48404200	49271953	chr26:48404200-48404400/ENSBTAG00000008272	547	0.773529	.	255115115	chr26	48404200	48404400	chr26:48404200-48404400	.	chr26	49271953	49271954	ENSBTAG00000008272	.
DMC88	chr26	48404200	50671512	chr26:48404200-48404400/ENSBTAG00000011092	467	-0.733566	.	135135255	chr26	48404200	48404400	chr26:48404200-48404400	.	chr26	50671512	50671513	ENSBTAG00000011092	.
DMC88	chr26	48717023	49234800	chr26:49233200-49234800/ENSBTAG00000053844	466	0.733079	.	255136136	chr26	49233200	49234800	chr26:49233200-49234800	.	chr26	48717023	48717024	ENSBTAG00000053844	.
DMC88	chr26	48717023	49252400	chr26:49249800-49252400/ENSBTAG00000053844	459	0.729503	.	255137137	chr26	49249800	49252400	chr26:49249800-49252400	.	chr26	48717023	48717024	ENSBTAG00000053844	.
DMC88	chr26	48717023	49267200	chr26:49257400-49267200/ENSBTAG00000053844	509	0.754534	.	255125125	chr26	49257400	49267200	chr26:49257400-49267200	.	chr26	48717023	48717024	ENSBTAG00000053844	.
DMC88	chr26	48717023	49268200	chr26:49268000-49268200/ENSBTAG00000053844	451	0.725927	.	255139139	chr26	49268000	49268200	chr26:49268000-49268200	.	chr26	48717023	48717024	ENSBTAG00000053844	.
DMC88	chr26	48862200	50822833	chr26:48862200-48864400/ENSBTAG00000019919	474	-0.737396	.	134134255	chr26	48862200	48864400	chr26:48862200-48864400	.	chr26	50822833	50822834	ENSBTAG00000019919	.
DMC88	chr26	48862200	50934247	chr26:48862200-48864400/ENSBTAG00000054665	419	-0.709783	.	148148255	chr26	48862200	48864400	chr26:48862200-48864400	.	chr26	50934247	50934248	ENSBTAG00000054665	.
DMC88	chr26	49027200	50723720	chr26:49027200-49028000/ENSBTAG00000005965	421	0.710918	.	255147147	chr26	49027200	49028000	chr26:49027200-49028000	.	chr26	50723720	50723721	ENSBTAG00000005965	.
DMC88	chr26	49027200	50904505	chr26:49027200-49028000/ENSBTAG00000015651	517	0.758824	.	255123123	chr26	49027200	49028000	chr26:49027200-49028000	.	chr26	50904505	50904506	ENSBTAG00000015651	.
DMC88	chr26	49027200	50934247	chr26:49027200-49028000/ENSBTAG00000054665	477	0.738952	.	255133133	chr26	49027200	49028000	chr26:49027200-49028000	.	chr26	50934247	50934248	ENSBTAG00000054665	.
DMC95	chr29	48568600	49282523	chr29:48568600-48570000/ENSBTAG00000002702	464	-0.732353	.	136136255	chr29	48568600	48570000	chr29:48568600-48570000	.	chr29	49282523	49282524	ENSBTAG00000002702	.
DMC95	chr29	48571600	49282523	chr29:48571600-48572400/ENSBTAG00000002702	447	-0.723529	.	141141255	chr29	48571600	48572400	chr29:48571600-48572400	.	chr29	49282523	49282524	ENSBTAG00000002702	.
DMC95	chr29	48750000	49282523	chr29:48750000-48751000/ENSBTAG00000002702	500	-0.75	.	127127255	chr29	48750000	48751000	chr29:48750000-48751000	.	chr29	49282523	49282524	ENSBTAG00000002702	.
DMC94	chr29	42924200	42997675	chr29:42924200-42925800/ENSBTAG00000001032	482	0.741176	.	255132132	chr29	42924200	42925800	chr29:42924200-42925800	.	chr29	42997675	42997676	ENSBTAG00000001032	.
DMC93	chr29	12102600	12728390	chr29:12102600-12103400/ENSBTAG00000011636	458	-0.729412	.	138138255	chr29	12102600	12103400	chr29:12102600-12103400	.	chr29	12728390	12728391	ENSBTAG00000011636	.
DMC93	chr29	12143800	12583654	chr29:12143800-12144000/ENSBTAG00000002417	417	0.708824	.	255148148	chr29	12143800	12144000	chr29:12143800-12144000	.	chr29	12583654	12583655	ENSBTAG00000002417	.
DMC99	chr3	107884600	108109056	chr3:107884600-107885600/ENSBTAG00000045776	782	0.891176	.	255,55,55	chr3	107884600	107885600	chr3:107884600-107885600	.	chr3	108109056	108109057	ENSBTAG00000045776	.
DMC99	chr3	107884600	108120963	chr3:107884600-107885600/ENSBTAG00000046989	776	0.888235	.	255,57,57	chr3	107884600	107885600	chr3:107884600-107885600	.	chr3	108120963	108120964	ENSBTAG00000046989	.
DMC99	chr3	107884600	108149712	chr3:107884600-107885600/ENSBTAG00000020510	479	0.739881	.	255132132	chr3	107884600	107885600	chr3:107884600-107885600	.	chr3	108149712	108149713	ENSBTAG00000020510	.
DMC99	chr3	107920577	108219400	chr3:108219000-108219400/ENSBTAG00000051564	528	0.76404	.	255120120	chr3	108219000	108219400	chr3:108219000-108219400	.	chr3	107920577	107920578	ENSBTAG00000051564	.
DMC98	chr3	79403800	80721387	chr3:79403800-79404400/ENSBTAG00000030686	488	0.744118	.	255130130	chr3	79403800	79404400	chr3:79403800-79404400	.	chr3	80721387	80721388	ENSBTAG00000030686	.
DMC98	chr3	79406648	81465800	chr3:81462800-81465800/ENSBTAG00000008636	423	-0.711765	.	147147255	chr3	81462800	81465800	chr3:81462800-81465800	.	chr3	79406648	79406649	ENSBTAG00000008636	.
DMC98	chr3	79430200	80721387	chr3:79430200-79431800/ENSBTAG00000030686	423	0.711765	.	255147147	chr3	79430200	79431800	chr3:79430200-79431800	.	chr3	80721387	80721388	ENSBTAG00000030686	.
DMC98	chr3	79838382	81499400	chr3:81498000-81499400/ENSBTAG00000005910	623	0.811765	.	255,96,96	chr3	81498000	81499400	chr3:81498000-81499400	.	chr3	79838382	79838383	ENSBTAG00000005910	.
DMC98	chr3	80100000	80721387	chr3:80100000-80101200/ENSBTAG00000030686	529	0.764706	.	255120120	chr3	80100000	80101200	chr3:80100000-80101200	.	chr3	80721387	80721388	ENSBTAG00000030686	.
DMC98	chr3	80102200	80721387	chr3:80102200-80103200/ENSBTAG00000030686	582	0.791176	.	255106106	chr3	80102200	80103200	chr3:80102200-80103200	.	chr3	80721387	80721388	ENSBTAG00000030686	.
DMC98	chr3	80255800	81022967	chr3:80255800-80258400/ENSBTAG00000016455	458	-0.729412	.	138138255	chr3	80255800	80258400	chr3:80255800-80258400	.	chr3	81022967	81022968	ENSBTAG00000016455	.
DMC98	chr3	80492200	80721387	chr3:80492200-80492600/ENSBTAG00000030686	523	-0.761765	.	121121255	chr3	80492200	80492600	chr3:80492200-80492600	.	chr3	80721387	80721388	ENSBTAG00000030686	.
DMC98	chr3	80503200	80721387	chr3:80503200-80503600/ENSBTAG00000030686	517	-0.758824	.	123123255	chr3	80503200	80503600	chr3:80503200-80503600	.	chr3	80721387	80721388	ENSBTAG00000030686	.
DMC100	chr3	107920577	108219400	chr3:108219000-108219400/ENSBTAG00000051564	528	0.76404	.	255120120	chr3	108219000	108219400	chr3:108219000-108219400	.	chr3	107920577	107920578	ENSBTAG00000051564	.
DMC100	chr3	108073600	108213207	chr3:108073600-108075200/ENSBTAG00000014326	517	0.758824	.	255123123	chr3	108073600	108075200	chr3:108073600-108075200	.	chr3	108213207	108213208	ENSBTAG00000014326	.
DMC100	chr3	108109056	108407600	chr3:108407400-108407600/ENSBTAG00000045776	423	-0.711765	.	147147255	chr3	108407400	108407600	chr3:108407400-108407600	.	chr3	108109056	108109057	ENSBTAG00000045776	.
DMC100	chr3	108109056	108556800	chr3:108553200-108556800/ENSBTAG00000045776	617	0.808824	.	255,97,97	chr3	108553200	108556800	chr3:108553200-108556800	.	chr3	108109056	108109057	ENSBTAG00000045776	.
DMC100	chr3	108109056	108589000	chr3:108587800-108589000/ENSBTAG00000045776	435	0.717647	.	255144144	chr3	108587800	108589000	chr3:108587800-108589000	.	chr3	108109056	108109057	ENSBTAG00000045776	.
DMC100	chr3	108120963	108333600	chr3:108331000-108333600/ENSBTAG00000046989	623	0.811765	.	255,96,96	chr3	108331000	108333600	chr3:108331000-108333600	.	chr3	108120963	108120964	ENSBTAG00000046989	.
DMC100	chr3	108120963	108407600	chr3:108407400-108407600/ENSBTAG00000046989	670	-0.835294	.	84,84,255	chr3	108407400	108407600	chr3:108407400-108407600	.	chr3	108120963	108120964	ENSBTAG00000046989	.
DMC100	chr3	108120963	108409400	chr3:108409000-108409400/ENSBTAG00000046989	629	-0.814706	.	94,94,255	chr3	108409000	108409400	chr3:108409000-108409400	.	chr3	108120963	108120964	ENSBTAG00000046989	.
DMC100	chr3	108120963	108556800	chr3:108553200-108556800/ENSBTAG00000046989	552	0.776471	.	255114114	chr3	108553200	108556800	chr3:108553200-108556800	.	chr3	108120963	108120964	ENSBTAG00000046989	.
DMC100	chr3	108120963	108607200	chr3:108607000-108607200/ENSBTAG00000046989	688	0.844118	.	255,79,79	chr3	108607000	108607200	chr3:108607000-108607200	.	chr3	108120963	108120964	ENSBTAG00000046989	.
DMC100	chr3	108149712	108556800	chr3:108553200-108556800/ENSBTAG00000020510	440	0.720251	.	255142142	chr3	108553200	108556800	chr3:108553200-108556800	.	chr3	108149712	108149713	ENSBTAG00000020510	.
DMC103	chr4	105787690	106529800	chr4:106528400-106529800/ENSBTAG00000048775	490	0.745434	.	255130130	chr4	106528400	106529800	chr4:106528400-106529800	.	chr4	105787690	105787691	ENSBTAG00000048775	.
DMC103	chr4	105787690	106552200	chr4:106549400-106552200/ENSBTAG00000048775	458	0.729229	.	255138138	chr4	106549400	106552200	chr4:106549400-106552200	.	chr4	105787690	105787691	ENSBTAG00000048775	.
DMC103	chr4	105787690	106569400	chr4:106566200-106569400/ENSBTAG00000048775	549	0.774603	.	255115115	chr4	106566200	106569400	chr4:106566200-106569400	.	chr4	105787690	105787691	ENSBTAG00000048775	.
DMC103	chr4	105787690	106571800	chr4:106570600-106571800/ENSBTAG00000048775	665	0.832942	.	255,85,85	chr4	106570600	106571800	chr4:106570600-106571800	.	chr4	105787690	105787691	ENSBTAG00000048775	.
DMC103	chr4	105995800	106651014	chr4:105995800-105998800/ENSBTAG00000009839	523	0.761765	.	255121121	chr4	105995800	105998800	chr4:105995800-105998800	.	chr4	106651014	106651015	ENSBTAG00000009839	.
DMC103	chr4	106015473	106529800	chr4:106528400-106529800/ENSBTAG00000053376	633	0.816819	.	255,93,93	chr4	106528400	106529800	chr4:106528400-106529800	.	chr4	106015473	106015474	ENSBTAG00000053376	.
DMC103	chr4	106015473	106569400	chr4:106566200-106569400/ENSBTAG00000053376	463	0.731995	.	255136136	chr4	106566200	106569400	chr4:106566200-106569400	.	chr4	106015473	106015474	ENSBTAG00000053376	.
DMC103	chr4	106015473	106571800	chr4:106570600-106571800/ENSBTAG00000053376	608	0.804252	.	255,99,99	chr4	106570600	106571800	chr4:106570600-106571800	.	chr4	106015473	106015474	ENSBTAG00000053376	.
DMC103	chr4	106015473	106714000	chr4:106713800-106714000/ENSBTAG00000053376	441	-0.721	.	142142255	chr4	106713800	106714000	chr4:106713800-106714000	.	chr4	106015473	106015474	ENSBTAG00000053376	.
DMC103	chr4	106015473	106739000	chr4:106737400-106739000/ENSBTAG00000053376	489	-0.744562	.	130130255	chr4	106737400	106739000	chr4:106737400-106739000	.	chr4	106015473	106015474	ENSBTAG00000053376	.
DMC103	chr4	106015473	106978600	chr4:106977800-106978600/ENSBTAG00000053376	454	-0.727283	.	139139255	chr4	106977800	106978600	chr4:106977800-106978600	.	chr4	106015473	106015474	ENSBTAG00000053376	.
DMC103	chr4	106030565	106529800	chr4:106528400-106529800/ENSBTAG00000053701	727	0.863501	.	255,69,69	chr4	106528400	106529800	chr4:106528400-106529800	.	chr4	106030565	106030566	ENSBTAG00000053701	.
DMC103	chr4	106030565	106552200	chr4:106549400-106552200/ENSBTAG00000053701	473	0.736764	.	255134134	chr4	106549400	106552200	chr4:106549400-106552200	.	chr4	106030565	106030566	ENSBTAG00000053701	.
DMC103	chr4	106030565	106569400	chr4:106566200-106569400/ENSBTAG00000053701	713	0.856742	.	255,73,73	chr4	106566200	106569400	chr4:106566200-106569400	.	chr4	106030565	106030566	ENSBTAG00000053701	.
DMC103	chr4	106030565	106571800	chr4:106570600-106571800/ENSBTAG00000053701	652	0.826325	.	255,88,88	chr4	106570600	106571800	chr4:106570600-106571800	.	chr4	106030565	106030566	ENSBTAG00000053701	.
DMC103	chr4	106032076	106569400	chr4:106566200-106569400/ENSBTAG00000053785	455	0.727665	.	255138138	chr4	106566200	106569400	chr4:106566200-106569400	.	chr4	106032076	106032077	ENSBTAG00000053785	.
DMC103	chr4	106032076	106571800	chr4:106570600-106571800/ENSBTAG00000053785	522	0.761439	.	255121121	chr4	106570600	106571800	chr4:106570600-106571800	.	chr4	106032076	106032077	ENSBTAG00000053785	.
DMC103	chr4	106044578	106529800	chr4:106528400-106529800/ENSBTAG00000054917	637	0.818902	.	255,92,92	chr4	106528400	106529800	chr4:106528400-106529800	.	chr4	106044578	106044579	ENSBTAG00000054917	.
DMC103	chr4	106044578	106569400	chr4:106566200-106569400/ENSBTAG00000054917	644	0.822478	.	255,90,90	chr4	106566200	106569400	chr4:106566200-106569400	.	chr4	106044578	106044579	ENSBTAG00000054917	.
DMC103	chr4	106044578	106571800	chr4:106570600-106571800/ENSBTAG00000054917	609	0.804598	.	255,99,99	chr4	106570600	106571800	chr4:106570600-106571800	.	chr4	106044578	106044579	ENSBTAG00000054917	.
DMC103	chr4	106056262	106529800	chr4:106528400-106529800/ENSBTAG00000049004	506	0.753463	.	255125125	chr4	106528400	106529800	chr4:106528400-106529800	.	chr4	106056262	106056263	ENSBTAG00000049004	.
DMC103	chr4	106056262	106552200	chr4:106549400-106552200/ENSBTAG00000049004	506	0.753463	.	255125125	chr4	106549400	106552200	chr4:106549400-106552200	.	chr4	106056262	106056263	ENSBTAG00000049004	.
DMC103	chr4	106056262	106569400	chr4:106566200-106569400/ENSBTAG00000049004	514	0.757327	.	255123123	chr4	106566200	106569400	chr4:106566200-106569400	.	chr4	106056262	106056263	ENSBTAG00000049004	.
DMC103	chr4	106056262	106571800	chr4:106570600-106571800/ENSBTAG00000049004	468	0.734144	.	255135135	chr4	106570600	106571800	chr4:106570600-106571800	.	chr4	106056262	106056263	ENSBTAG00000049004	.
DMC103	chr4	106056469	106552200	chr4:106549400-106552200/ENSBTAG00000047919	600	0.800089	.	255102102	chr4	106549400	106552200	chr4:106549400-106552200	.	chr4	106056469	106056470	ENSBTAG00000047919	.
DMC103	chr4	106056469	106569400	chr4:106566200-106569400/ENSBTAG00000047919	576	0.788147	.	255108108	chr4	106566200	106569400	chr4:106566200-106569400	.	chr4	106056469	106056470	ENSBTAG00000047919	.
DMC103	chr4	106082256	106529800	chr4:106528400-106529800/ENSBTAG00000034609	447	0.723529	.	255141141	chr4	106528400	106529800	chr4:106528400-106529800	.	chr4	106082256	106082257	ENSBTAG00000034609	.
DMC103	chr4	106082256	106569400	chr4:106566200-106569400/ENSBTAG00000034609	441	0.720588	.	255142142	chr4	106566200	106569400	chr4:106566200-106569400	.	chr4	106082256	106082257	ENSBTAG00000034609	.
DMC103	chr4	106082256	106571800	chr4:106570600-106571800/ENSBTAG00000034609	682	0.841176	.	255,81,81	chr4	106570600	106571800	chr4:106570600-106571800	.	chr4	106082256	106082257	ENSBTAG00000034609	.
DMC103	chr4	106091800	106775572	chr4:106091800-106094000/ENSBTAG00000017970	552	0.776471	.	255114114	chr4	106091800	106094000	chr4:106091800-106094000	.	chr4	106775572	106775573	ENSBTAG00000017970	.
DMC103	chr4	106102213	106552200	chr4:106549400-106552200/ENSBTAG00000027204	629	0.814706	.	255,94,94	chr4	106549400	106552200	chr4:106549400-106552200	.	chr4	106102213	106102214	ENSBTAG00000027204	.
DMC103	chr4	106102213	106569400	chr4:106566200-106569400/ENSBTAG00000027204	505	0.752941	.	255126126	chr4	106566200	106569400	chr4:106566200-106569400	.	chr4	106102213	106102214	ENSBTAG00000027204	.
DMC103	chr4	106102213	106571800	chr4:106570600-106571800/ENSBTAG00000027204	476	0.738235	.	255133133	chr4	106570600	106571800	chr4:106570600-106571800	.	chr4	106102213	106102214	ENSBTAG00000027204	.
DMC103	chr4	106112800	106278917	chr4:106112800-106118200/ENSBTAG00000014533	503	0.751916	.	255126126	chr4	106112800	106118200	chr4:106112800-106118200	.	chr4	106278917	106278918	ENSBTAG00000014533	.
DMC103	chr4	106112800	107070624	chr4:106112800-106118200/ENSBTAG00000002554	500	-0.75	.	127127255	chr4	106112800	106118200	chr4:106112800-106118200	.	chr4	107070624	107070625	ENSBTAG00000002554	.
DMC103	chr4	106121757	106529800	chr4:106528400-106529800/ENSBTAG00000009558	439	0.719506	.	255143143	chr4	106528400	106529800	chr4:106528400-106529800	.	chr4	106121757	106121758	ENSBTAG00000009558	.
DMC103	chr4	106121757	106571800	chr4:106570600-106571800/ENSBTAG00000009558	458	0.729229	.	255138138	chr4	106570600	106571800	chr4:106570600-106571800	.	chr4	106121757	106121758	ENSBTAG00000009558	.
DMC110	chr5	109423829	109526000	chr5:109524200-109526000/ENSBTAG00000030258	564	-0.782353	.	111111255	chr5	109524200	109526000	chr5:109524200-109526000	.	chr5	109423829	109423830	ENSBTAG00000030258	.
DMC110	chr5	109472400	109484519	chr5:109472400-109474600/ENSBTAG00000030257	447	0.723529	.	255141141	chr5	109472400	109474600	chr5:109472400-109474600	.	chr5	109484519	109484520	ENSBTAG00000030257	.
DMC112	chr5	118156000	119680303	chr5:118156000-118157800/ENSBTAG00000024756	494	0.747059	.	255129129	chr5	118156000	118157800	chr5:118156000-118157800	.	chr5	119680303	119680304	ENSBTAG00000024756	.
DMC19	chr5	118262400	119680303	chr5:118262400-118267600/ENSBTAG00000024756	488	0.744118	.	255130130	chr5	118262400	118267600	chr5:118262400-118267600	.	chr5	119680303	119680304	ENSBTAG00000024756	.
DMC19	chr5	118304835	119724000	chr5:119723800-119724000/ENSBTAG00000022986	445	0.722717	.	255141141	chr5	119723800	119724000	chr5:119723800-119724000	.	chr5	118304835	118304836	ENSBTAG00000022986	.
DMC19	chr5	118334600	119634547	chr5:118334600-118337400/ENSBTAG00000030182	500	0.75	.	255127127	chr5	118334600	118337400	chr5:118334600-118337400	.	chr5	119634547	119634548	ENSBTAG00000030182	.
DMC19	chr5	118334600	119680303	chr5:118334600-118337400/ENSBTAG00000024756	470	0.735294	.	255135135	chr5	118334600	118337400	chr5:118334600-118337400	.	chr5	119680303	119680304	ENSBTAG00000024756	.
DMC19	chr5	118341200	119680303	chr5:118341200-118343200/ENSBTAG00000024756	488	0.744118	.	255130130	chr5	118341200	118343200	chr5:118341200-118343200	.	chr5	119680303	119680304	ENSBTAG00000024756	.
DMC19	chr5	118447200	119680303	chr5:118447200-118447800/ENSBTAG00000024756	647	0.823529	.	255,90,90	chr5	118447200	118447800	chr5:118447200-118447800	.	chr5	119680303	119680304	ENSBTAG00000024756	.
DMC19	chr5	118450400	119634547	chr5:118450400-118452800/ENSBTAG00000030182	523	0.761765	.	255121121	chr5	118450400	118452800	chr5:118450400-118452800	.	chr5	119634547	119634548	ENSBTAG00000030182	.
DMC19	chr5	118450400	119680303	chr5:118450400-118452800/ENSBTAG00000024756	441	0.720588	.	255142142	chr5	118450400	118452800	chr5:118450400-118452800	.	chr5	119680303	119680304	ENSBTAG00000024756	.
DMC19	chr5	118477000	119680303	chr5:118477000-118479800/ENSBTAG00000024756	458	0.729412	.	255138138	chr5	118477000	118479800	chr5:118477000-118479800	.	chr5	119680303	119680304	ENSBTAG00000024756	.
DMC19	chr5	118690600	119789095	chr5:118690600-118690800/ENSBTAG00000054072	615	0.807947	.	255,98,98	chr5	118690600	118690800	chr5:118690600-118690800	.	chr5	119789095	119789096	ENSBTAG00000054072	.
DMC19	chr5	119141800	119680303	chr5:119141800-119142800/ENSBTAG00000024756	470	0.735294	.	255135135	chr5	119141800	119142800	chr5:119141800-119142800	.	chr5	119680303	119680304	ENSBTAG00000024756	.
DMC19	chr5	119348910	119724000	chr5:119723800-119724000/ENSBTAG00000045904	452	-0.726471	.	139139255	chr5	119723800	119724000	chr5:119723800-119724000	.	chr5	119348910	119348911	ENSBTAG00000045904	.
DMC19	chr5	119466600	119666475	chr5:119466600-119468800/ENSBTAG00000014966	429	-0.714706	.	145145255	chr5	119466600	119468800	chr5:119466600-119468800	.	chr5	119666475	119666476	ENSBTAG00000014966	.
DMC19	chr5	119466600	119789095	chr5:119466600-119468800/ENSBTAG00000054072	542	0.771155	.	255116116	chr5	119466600	119468800	chr5:119466600-119468800	.	chr5	119789095	119789096	ENSBTAG00000054072	.
DMC19	chr5	119556874	119786600	chr5:119786400-119786600/ENSBTAG00000001931	488	-0.744118	.	130130255	chr5	119786400	119786600	chr5:119786400-119786600	.	chr5	119556874	119556875	ENSBTAG00000001931	.
DMC109	chr5	103547189	103813800	chr5:103810200-103813800/ENSBTAG00000011274	570	0.785294	.	255109109	chr5	103810200	103813800	chr5:103810200-103813800	.	chr5	103547189	103547190	ENSBTAG00000011274	.
DMC109	chr5	103554354	103813800	chr5:103810200-103813800/ENSBTAG00000011273	437	0.718538	.	255143143	chr5	103810200	103813800	chr5:103810200-103813800	.	chr5	103554354	103554355	ENSBTAG00000011273	.
DMC113	chr6	63348187	67241000	chr6:67240200-67241000/ENSBTAG00000000287	547	0.773529	.	255115115	chr6	67240200	67241000	chr6:67240200-67241000	.	chr6	63348187	63348188	ENSBTAG00000000287	.
DMC113	chr6	65611356	67241000	chr6:67240200-67241000/ENSBTAG00000017837	719	0.859797	.	255,71,71	chr6	67240200	67241000	chr6:67240200-67241000	.	chr6	65611356	65611357	ENSBTAG00000017837	.
DMC113	chr6	66702049	67779600	chr6:67778000-67779600/ENSBTAG00000009423	417	0.708824	.	255148148	chr6	67778000	67779600	chr6:67778000-67779600	.	chr6	66702049	66702050	ENSBTAG00000009423	.
DMC113	chr6	66750600	67172309	chr6:66750600-66758000/ENSBTAG00000004886	529	-0.76488	.	120120255	chr6	66750600	66758000	chr6:66750600-66758000	.	chr6	67172309	67172310	ENSBTAG00000004886	.
DMC113	chr6	66751400	67172309	chr6:66751400-66757000/ENSBTAG00000004886	458	-0.729229	.	138138255	chr6	66751400	66757000	chr6:66751400-66757000	.	chr6	67172309	67172310	ENSBTAG00000004886	.
DMC114	chr7	9190000	11665060	chr7:9190000-9190200/ENSBTAG00000016933	480	0.740381	.	255132132	chr7	9190000	9190200	chr7:9190000-9190200	.	chr7	11665060	11665061	ENSBTAG00000016933	.
DMC114	chr7	9329484	11376400	chr7:11375000-11376400/ENSBTAG00000052522	470	0.735294	.	255135135	chr7	11375000	11376400	chr7:11375000-11376400	.	chr7	9329484	9329485	ENSBTAG00000052522	.
DMC114	chr7	9329484	11395000	chr7:11388000-11395000/ENSBTAG00000052522	635	0.817647	.	255,93,93	chr7	11388000	11395000	chr7:11388000-11395000	.	chr7	9329484	9329485	ENSBTAG00000052522	.
DMC114	chr7	9329484	11410000	chr7:11409600-11410000/ENSBTAG00000052522	658	0.829412	.	255,87,87	chr7	11409600	11410000	chr7:11409600-11410000	.	chr7	9329484	9329485	ENSBTAG00000052522	.
DMC114	chr7	9329484	11685000	chr7:11680600-11685000/ENSBTAG00000052522	605	0.802941	.	255100100	chr7	11680600	11685000	chr7:11680600-11685000	.	chr7	9329484	9329485	ENSBTAG00000052522	.
DMC114	chr7	9329484	12020200	chr7:12018600-12020200/ENSBTAG00000052522	464	-0.732353	.	136136255	chr7	12018600	12020200	chr7:12018600-12020200	.	chr7	9329484	9329485	ENSBTAG00000052522	.
DMC114	chr7	9329484	12227000	chr7:12226200-12227000/ENSBTAG00000052522	711	-0.855882	.	73,73,255	chr7	12226200	12227000	chr7:12226200-12227000	.	chr7	9329484	9329485	ENSBTAG00000052522	.
DMC114	chr7	9329484	12320800	chr7:12318600-12320800/ENSBTAG00000052522	441	-0.720588	.	142142255	chr7	12318600	12320800	chr7:12318600-12320800	.	chr7	9329484	9329485	ENSBTAG00000052522	.
DMC114	chr7	9621200	12356853	chr7:9621200-9621600/ENSBTAG00000053190	492	0.746352	.	255129129	chr7	9621200	9621600	chr7:9621200-9621600	.	chr7	12356853	12356854	ENSBTAG00000053190	.
DMC114	chr7	10594261	11302800	chr7:11302600-11302800/ENSBTAG00000049961	570	-0.785294	.	109109255	chr7	11302600	11302800	chr7:11302600-11302800	.	chr7	10594261	10594262	ENSBTAG00000049961	.
DMC114	chr7	10594261	11327800	chr7:11327600-11327800/ENSBTAG00000049961	488	0.744118	.	255130130	chr7	11327600	11327800	chr7:11327600-11327800	.	chr7	10594261	10594262	ENSBTAG00000049961	.
DMC114	chr7	10594261	11410000	chr7:11409600-11410000/ENSBTAG00000049961	647	0.823529	.	255,90,90	chr7	11409600	11410000	chr7:11409600-11410000	.	chr7	10594261	10594262	ENSBTAG00000049961	.
DMC114	chr7	10594261	11438600	chr7:11429800-11438600/ENSBTAG00000049961	452	0.726471	.	255139139	chr7	11429800	11438600	chr7:11429800-11438600	.	chr7	10594261	10594262	ENSBTAG00000049961	.
DMC114	chr7	10594261	11685000	chr7:11680600-11685000/ENSBTAG00000049961	599	0.8	.	255102102	chr7	11680600	11685000	chr7:11680600-11685000	.	chr7	10594261	10594262	ENSBTAG00000049961	.
DMC114	chr7	10594261	12320800	chr7:12318600-12320800/ENSBTAG00000049961	429	-0.714706	.	145145255	chr7	12318600	12320800	chr7:12318600-12320800	.	chr7	10594261	10594262	ENSBTAG00000049961	.
DMC114	chr7	10727600	11665060	chr7:10727600-10729000/ENSBTAG00000016933	458	0.729412	.	255138138	chr7	10727600	10729000	chr7:10727600-10729000	.	chr7	11665060	11665061	ENSBTAG00000016933	.
DMC114	chr7	10727600	11759483	chr7:10727600-10729000/ENSBTAG00000006073	498	0.749266	.	255128128	chr7	10727600	10729000	chr7:10727600-10729000	.	chr7	11759483	11759484	ENSBTAG00000006073	.
DMC114	chr7	10762312	11302800	chr7:11302600-11302800/ENSBTAG00000003528	577	-0.788544	.	107107255	chr7	11302600	11302800	chr7:11302600-11302800	.	chr7	10762312	10762313	ENSBTAG00000003528	.
DMC114	chr7	10762312	11327800	chr7:11327600-11327800/ENSBTAG00000003528	495	0.747703	.	255128128	chr7	11327600	11327800	chr7:11327600-11327800	.	chr7	10762312	10762313	ENSBTAG00000003528	.
DMC114	chr7	10762312	11410000	chr7:11409600-11410000/ENSBTAG00000003528	693	0.846664	.	255,78,78	chr7	11409600	11410000	chr7:11409600-11410000	.	chr7	10762312	10762313	ENSBTAG00000003528	.
DMC114	chr7	10762312	11438600	chr7:11429800-11438600/ENSBTAG00000003528	633	0.816819	.	255,93,93	chr7	11429800	11438600	chr7:11429800-11438600	.	chr7	10762312	10762313	ENSBTAG00000003528	.
DMC114	chr7	10762312	11685000	chr7:11680600-11685000/ENSBTAG00000003528	762	0.881222	.	255,60,60	chr7	11680600	11685000	chr7:11680600-11685000	.	chr7	10762312	10762313	ENSBTAG00000003528	.
DMC114	chr7	10762312	11755800	chr7:11751400-11755800/ENSBTAG00000003528	482	0.74142	.	255132132	chr7	11751400	11755800	chr7:11751400-11755800	.	chr7	10762312	10762313	ENSBTAG00000003528	.
DMC114	chr7	10762312	12187800	chr7:12186200-12187800/ENSBTAG00000003528	511	-0.755557	.	124124255	chr7	12186200	12187800	chr7:12186200-12187800	.	chr7	10762312	10762313	ENSBTAG00000003528	.
DMC114	chr7	10762312	12320800	chr7:12318600-12320800/ENSBTAG00000003528	507	-0.753987	.	125125255	chr7	12318600	12320800	chr7:12318600-12320800	.	chr7	10762312	10762313	ENSBTAG00000003528	.
DMC114	chr7	10856126	11410000	chr7:11409600-11410000/ENSBTAG00000026148	659	0.829652	.	255,86,86	chr7	11409600	11410000	chr7:11409600-11410000	.	chr7	10856126	10856127	ENSBTAG00000026148	.
DMC114	chr7	10856126	11438600	chr7:11429800-11438600/ENSBTAG00000026148	579	0.789651	.	255107107	chr7	11429800	11438600	chr7:11429800-11438600	.	chr7	10856126	10856127	ENSBTAG00000026148	.
DMC114	chr7	10856126	11685000	chr7:11680600-11685000/ENSBTAG00000026148	608	0.804467	.	255,99,99	chr7	11680600	11685000	chr7:11680600-11685000	.	chr7	10856126	10856127	ENSBTAG00000026148	.
DMC114	chr7	10856126	11755800	chr7:11751400-11755800/ENSBTAG00000026148	511	0.755576	.	255124124	chr7	11751400	11755800	chr7:11751400-11755800	.	chr7	10856126	10856127	ENSBTAG00000026148	.
DMC114	chr7	10856126	12187800	chr7:12186200-12187800/ENSBTAG00000026148	549	-0.774836	.	115115255	chr7	12186200	12187800	chr7:12186200-12187800	.	chr7	10856126	10856127	ENSBTAG00000026148	.
DMC114	chr7	10856126	12320800	chr7:12318600-12320800/ENSBTAG00000026148	505	-0.752613	.	126126255	chr7	12318600	12320800	chr7:12318600-12320800	.	chr7	10856126	10856127	ENSBTAG00000026148	.
DMC114	chr7	10998204	11395000	chr7:11388000-11395000/ENSBTAG00000014365	437	0.718741	.	255143143	chr7	11388000	11395000	chr7:11388000-11395000	.	chr7	10998204	10998205	ENSBTAG00000014365	.
DMC114	chr7	10998204	11410000	chr7:11409600-11410000/ENSBTAG00000014365	727	0.863698	.	255,69,69	chr7	11409600	11410000	chr7:11409600-11410000	.	chr7	10998204	10998205	ENSBTAG00000014365	.
DMC114	chr7	10998204	11438600	chr7:11429800-11438600/ENSBTAG00000014365	645	0.822929	.	255,90,90	chr7	11429800	11438600	chr7:11429800-11438600	.	chr7	10998204	10998205	ENSBTAG00000014365	.
DMC114	chr7	10998204	11685000	chr7:11680600-11685000/ENSBTAG00000014365	606	0.803299	.	255100100	chr7	11680600	11685000	chr7:11680600-11685000	.	chr7	10998204	10998205	ENSBTAG00000014365	.
DMC114	chr7	10998204	11755800	chr7:11751400-11755800/ENSBTAG00000014365	706	0.853128	.	255,74,74	chr7	11751400	11755800	chr7:11751400-11755800	.	chr7	10998204	10998205	ENSBTAG00000014365	.
DMC114	chr7	10998204	12187800	chr7:12186200-12187800/ENSBTAG00000014365	516	-0.758	.	123123255	chr7	12186200	12187800	chr7:12186200-12187800	.	chr7	10998204	10998205	ENSBTAG00000014365	.
DMC114	chr7	10998204	12320800	chr7:12318600-12320800/ENSBTAG00000014365	440	-0.720251	.	142142255	chr7	12318600	12320800	chr7:12318600-12320800	.	chr7	10998204	10998205	ENSBTAG00000014365	.
DMC114	chr7	11067200	11371722	chr7:11067200-11070400/ENSBTAG00000021818	576	0.788235	.	255108108	chr7	11067200	11070400	chr7:11067200-11070400	.	chr7	11371722	11371723	ENSBTAG00000021818	.
DMC114	chr7	11067200	11809941	chr7:11067200-11070400/ENSBTAG00000000399	451	-0.725667	.	139139255	chr7	11067200	11070400	chr7:11067200-11070400	.	chr7	11809941	11809942	ENSBTAG00000000399	.
DMC114	chr7	11121600	11371722	chr7:11121600-11123400/ENSBTAG00000021818	470	0.735294	.	255135135	chr7	11121600	11123400	chr7:11121600-11123400	.	chr7	11371722	11371723	ENSBTAG00000021818	.
DMC114	chr7	11121600	11735293	chr7:11121600-11123400/ENSBTAG00000008841	564	0.782353	.	255111111	chr7	11121600	11123400	chr7:11121600-11123400	.	chr7	11735293	11735294	ENSBTAG00000008841	.
DMC114	chr7	11121600	11759483	chr7:11121600-11123400/ENSBTAG00000006073	469	0.734516	.	255135135	chr7	11121600	11123400	chr7:11121600-11123400	.	chr7	11759483	11759484	ENSBTAG00000006073	.
DMC114	chr7	11127788	11302800	chr7:11302600-11302800/ENSBTAG00000002937	635	-0.817647	.	93,93,255	chr7	11302600	11302800	chr7:11302600-11302800	.	chr7	11127788	11127789	ENSBTAG00000002937	.
DMC114	chr7	11127788	11395000	chr7:11388000-11395000/ENSBTAG00000002937	547	0.773529	.	255115115	chr7	11388000	11395000	chr7:11388000-11395000	.	chr7	11127788	11127789	ENSBTAG00000002937	.
DMC114	chr7	11127788	11410000	chr7:11409600-11410000/ENSBTAG00000002937	558	0.779412	.	255112112	chr7	11409600	11410000	chr7:11409600-11410000	.	chr7	11127788	11127789	ENSBTAG00000002937	.
DMC114	chr7	11127788	11438600	chr7:11429800-11438600/ENSBTAG00000002937	517	0.758824	.	255123123	chr7	11429800	11438600	chr7:11429800-11438600	.	chr7	11127788	11127789	ENSBTAG00000002937	.
DMC114	chr7	11127788	11685000	chr7:11680600-11685000/ENSBTAG00000002937	670	0.835294	.	255,84,84	chr7	11680600	11685000	chr7:11680600-11685000	.	chr7	11127788	11127789	ENSBTAG00000002937	.
DMC114	chr7	11127788	12187800	chr7:12186200-12187800/ENSBTAG00000002937	476	-0.738235	.	133133255	chr7	12186200	12187800	chr7:12186200-12187800	.	chr7	11127788	11127789	ENSBTAG00000002937	.
DMC114	chr7	11127788	12227000	chr7:12226200-12227000/ENSBTAG00000002937	417	-0.708824	.	148148255	chr7	12226200	12227000	chr7:12226200-12227000	.	chr7	11127788	11127789	ENSBTAG00000002937	.
DMC114	chr7	11127788	12320800	chr7:12318600-12320800/ENSBTAG00000002937	529	-0.764706	.	120120255	chr7	12318600	12320800	chr7:12318600-12320800	.	chr7	11127788	11127789	ENSBTAG00000002937	.
DMC114	chr7	11146800	11759483	chr7:11146800-11149200/ENSBTAG00000006073	463	0.731567	.	255136136	chr7	11146800	11149200	chr7:11146800-11149200	.	chr7	11759483	11759484	ENSBTAG00000006073	.
DMC114	chr7	11152000	11735293	chr7:11152000-11154600/ENSBTAG00000008841	500	0.75	.	255127127	chr7	11152000	11154600	chr7:11152000-11154600	.	chr7	11735293	11735294	ENSBTAG00000008841	.
DMC114	chr7	11152000	11759483	chr7:11152000-11154600/ENSBTAG00000006073	640	0.820063	.	255,91,91	chr7	11152000	11154600	chr7:11152000-11154600	.	chr7	11759483	11759484	ENSBTAG00000006073	.
DMC114	chr7	11197800	11371722	chr7:11197800-11198800/ENSBTAG00000021818	764	0.882353	.	255,60,60	chr7	11197800	11198800	chr7:11197800-11198800	.	chr7	11371722	11371723	ENSBTAG00000021818	.
DMC114	chr7	11197800	11631611	chr7:11197800-11198800/ENSBTAG00000046744	638	0.819282	.	255,92,92	chr7	11197800	11198800	chr7:11197800-11198800	.	chr7	11631611	11631612	ENSBTAG00000046744	.
DMC114	chr7	11197800	11759483	chr7:11197800-11198800/ENSBTAG00000006073	575	0.787614	.	255108108	chr7	11197800	11198800	chr7:11197800-11198800	.	chr7	11759483	11759484	ENSBTAG00000006073	.
DMC114	chr7	11197800	11809941	chr7:11197800-11198800/ENSBTAG00000000399	533	-0.766965	.	119119255	chr7	11197800	11198800	chr7:11197800-11198800	.	chr7	11809941	11809942	ENSBTAG00000000399	.
DMC114	chr7	11197800	12144237	chr7:11197800-11198800/ENSBTAG00000014828	523	-0.761765	.	121121255	chr7	11197800	11198800	chr7:11197800-11198800	.	chr7	12144237	12144238	ENSBTAG00000014828	.
DMC114	chr7	11216132	11376400	chr7:11375000-11376400/ENSBTAG00000053318	609	0.804809	.	255,99,99	chr7	11375000	11376400	chr7:11375000-11376400	.	chr7	11216132	11216133	ENSBTAG00000053318	.
DMC114	chr7	11216132	11395000	chr7:11388000-11395000/ENSBTAG00000053318	642	0.821419	.	255,91,91	chr7	11388000	11395000	chr7:11388000-11395000	.	chr7	11216132	11216133	ENSBTAG00000053318	.
DMC114	chr7	11216132	11438600	chr7:11429800-11438600/ENSBTAG00000053318	642	0.821419	.	255,91,91	chr7	11429800	11438600	chr7:11429800-11438600	.	chr7	11216132	11216133	ENSBTAG00000053318	.
DMC114	chr7	11216132	11575200	chr7:11574200-11575200/ENSBTAG00000053318	491	0.745921	.	255129129	chr7	11574200	11575200	chr7:11574200-11575200	.	chr7	11216132	11216133	ENSBTAG00000053318	.
DMC114	chr7	11216132	11685000	chr7:11680600-11685000/ENSBTAG00000053318	582	0.791219	.	255106106	chr7	11680600	11685000	chr7:11680600-11685000	.	chr7	11216132	11216133	ENSBTAG00000053318	.
DMC114	chr7	11216132	12187800	chr7:12186200-12187800/ENSBTAG00000053318	473	-0.736861	.	134134255	chr7	12186200	12187800	chr7:12186200-12187800	.	chr7	11216132	11216133	ENSBTAG00000053318	.
DMC114	chr7	11216132	12265400	chr7:12264000-12265400/ENSBTAG00000053318	458	-0.729311	.	138138255	chr7	12264000	12265400	chr7:12264000-12265400	.	chr7	11216132	11216133	ENSBTAG00000053318	.
DMC114	chr7	11216132	12320800	chr7:12318600-12320800/ENSBTAG00000053318	516	-0.758	.	123123255	chr7	12318600	12320800	chr7:12318600-12320800	.	chr7	11216132	11216133	ENSBTAG00000053318	.
DMC114	chr7	11227835	11545000	chr7:11544200-11545000/ENSBTAG00000012634	511	-0.755882	.	124124255	chr7	11544200	11545000	chr7:11544200-11545000	.	chr7	11227835	11227836	ENSBTAG00000012634	.
DMC115	chr7	19074800	19257053	chr7:19074800-19076200/ENSBTAG00000002224	599	0.8	.	255102102	chr7	19074800	19076200	chr7:19074800-19076200	.	chr7	19257053	19257054	ENSBTAG00000002224	.
DMC119	chr9	98553800	101728198	chr9:98553800-98554600/ENSBTAG00000021741	635	0.817647	.	255,93,93	chr9	98553800	98554600	chr9:98553800-98554600	.	chr9	101728198	101728199	ENSBTAG00000021741	.
DMC119	chr9	98589600	101728198	chr9:98589600-98619400/ENSBTAG00000021741	423	0.711765	.	255147147	chr9	98589600	98619400	chr9:98589600-98619400	.	chr9	101728198	101728199	ENSBTAG00000021741	.
DMC119	chr9	98589600	101777925	chr9:98589600-98619400/ENSBTAG00000014494	447	-0.723529	.	141141255	chr9	98589600	98619400	chr9:98589600-98619400	.	chr9	101777925	101777926	ENSBTAG00000014494	.
DMC119	chr9	98820539	101590800	chr9:101590200-101590800/ENSBTAG00000011593	800	0.9	.	255,50,50	chr9	101590200	101590800	chr9:101590200-101590800	.	chr9	98820539	98820540	ENSBTAG00000011593	.
DMC119	chr9	98820539	102231400	chr9:102230200-102231400/ENSBTAG00000011593	682	0.841176	.	255,81,81	chr9	102230200	102231400	chr9:102230200-102231400	.	chr9	98820539	98820540	ENSBTAG00000011593	.
DMC119	chr9	98834400	101728198	chr9:98834400-98835600/ENSBTAG00000021741	647	0.823529	.	255,90,90	chr9	98834400	98835600	chr9:98834400-98835600	.	chr9	101728198	101728199	ENSBTAG00000021741	.
DMC119	chr9	98907000	101728198	chr9:98907000-98911000/ENSBTAG00000021741	541	0.770588	.	255117117	chr9	98907000	98911000	chr9:98907000-98911000	.	chr9	101728198	101728199	ENSBTAG00000021741	.
DMC119	chr9	99025400	101728198	chr9:99025400-99025800/ENSBTAG00000021741	582	0.791176	.	255106106	chr9	99025400	99025800	chr9:99025400-99025800	.	chr9	101728198	101728199	ENSBTAG00000021741	.
DMC119	chr9	99087000	102410506	chr9:99087000-99090200/ENSBTAG00000007694	436	0.718175	.	255143143	chr9	99087000	99090200	chr9:99087000-99090200	.	chr9	102410506	102410507	ENSBTAG00000007694	.
DMC119	chr9	99200400	101728198	chr9:99200400-99202400/ENSBTAG00000021741	611	0.805882	.	255,99,99	chr9	99200400	99202400	chr9:99200400-99202400	.	chr9	101728198	101728199	ENSBTAG00000021741	.
DMC119	chr9	99213600	101777925	chr9:99213600-99214800/ENSBTAG00000014494	629	-0.814706	.	94,94,255	chr9	99213600	99214800	chr9:99213600-99214800	.	chr9	101777925	101777926	ENSBTAG00000014494	.
DMC119	chr9	99213600	101910811	chr9:99213600-99214800/ENSBTAG00000014496	505	-0.752941	.	126126255	chr9	99213600	99214800	chr9:99213600-99214800	.	chr9	101910811	101910812	ENSBTAG00000014496	.
DMC119	chr9	99217000	101728198	chr9:99217000-99220800/ENSBTAG00000021741	658	0.829412	.	255,87,87	chr9	99217000	99220800	chr9:99217000-99220800	.	chr9	101728198	101728199	ENSBTAG00000021741	.
DMC119	chr9	99258400	101728198	chr9:99258400-99260000/ENSBTAG00000021741	470	0.735294	.	255135135	chr9	99258400	99260000	chr9:99258400-99260000	.	chr9	101728198	101728199	ENSBTAG00000021741	.
DMC119	chr9	99297400	101728198	chr9:99297400-99298000/ENSBTAG00000021741	441	0.720588	.	255142142	chr9	99297400	99298000	chr9:99297400-99298000	.	chr9	101728198	101728199	ENSBTAG00000021741	.
DMC119	chr9	99316600	101728198	chr9:99316600-99325600/ENSBTAG00000021741	488	0.744118	.	255130130	chr9	99316600	99325600	chr9:99316600-99325600	.	chr9	101728198	101728199	ENSBTAG00000021741	.
DMC119	chr9	99390200	101728198	chr9:99390200-99399200/ENSBTAG00000021741	594	0.797059	.	255103103	chr9	99390200	99399200	chr9:99390200-99399200	.	chr9	101728198	101728199	ENSBTAG00000021741	.
DMC119	chr9	100050400	101728198	chr9:100050400-100051000/ENSBTAG00000021741	458	0.729412	.	255138138	chr9	100050400	100051000	chr9:100050400-100051000	.	chr9	101728198	101728199	ENSBTAG00000021741	.
DMC119	chr9	100050400	101777925	chr9:100050400-100051000/ENSBTAG00000014494	482	-0.741176	.	132132255	chr9	100050400	100051000	chr9:100050400-100051000	.	chr9	101777925	101777926	ENSBTAG00000014494	.
DMC119	chr9	100050400	101910811	chr9:100050400-100051000/ENSBTAG00000014496	500	-0.75	.	127127255	chr9	100050400	100051000	chr9:100050400-100051000	.	chr9	101910811	101910812	ENSBTAG00000014496	.
DMC119	chr9	100099800	101777925	chr9:100099800-100100000/ENSBTAG00000014494	505	0.752941	.	255126126	chr9	100099800	100100000	chr9:100099800-100100000	.	chr9	101777925	101777926	ENSBTAG00000014494	.
DMC119	chr9	100116400	101777925	chr9:100116400-100117400/ENSBTAG00000014494	511	-0.755882	.	124124255	chr9	100116400	100117400	chr9:100116400-100117400	.	chr9	101777925	101777926	ENSBTAG00000014494	.
DMC119	chr9	100116400	101910811	chr9:100116400-100117400/ENSBTAG00000014496	488	-0.744118	.	130130255	chr9	100116400	100117400	chr9:100116400-100117400	.	chr9	101910811	101910812	ENSBTAG00000014496	.
DMC119	chr9	100165600	101777925	chr9:100165600-100168200/ENSBTAG00000014494	523	-0.761765	.	121121255	chr9	100165600	100168200	chr9:100165600-100168200	.	chr9	101777925	101777926	ENSBTAG00000014494	.
DMC119	chr9	100165600	101910811	chr9:100165600-100168200/ENSBTAG00000014496	482	-0.741176	.	132132255	chr9	100165600	100168200	chr9:100165600-100168200	.	chr9	101910811	101910812	ENSBTAG00000014496	.
DMC119	chr9	100394800	101728198	chr9:100394800-100395800/ENSBTAG00000021741	541	0.770588	.	255117117	chr9	100394800	100395800	chr9:100394800-100395800	.	chr9	101728198	101728199	ENSBTAG00000021741	.
DMC119	chr9	100394800	101777925	chr9:100394800-100395800/ENSBTAG00000014494	482	-0.741176	.	132132255	chr9	100394800	100395800	chr9:100394800-100395800	.	chr9	101777925	101777926	ENSBTAG00000014494	.
DMC119	chr9	100394800	101910811	chr9:100394800-100395800/ENSBTAG00000014496	447	-0.723529	.	141141255	chr9	100394800	100395800	chr9:100394800-100395800	.	chr9	101910811	101910812	ENSBTAG00000014496	.
DMC119	chr9	100448228	101812600	chr9:101812400-101812600/ENSBTAG00000015485	461	0.730821	.	255137137	chr9	101812400	101812600	chr9:101812400-101812600	.	chr9	100448228	100448229	ENSBTAG00000015485	.
DMC119	chr9	100452600	101777925	chr9:100452600-100453800/ENSBTAG00000014494	547	-0.773529	.	115115255	chr9	100452600	100453800	chr9:100452600-100453800	.	chr9	101777925	101777926	ENSBTAG00000014494	.
DMC119	chr9	100452600	101910811	chr9:100452600-100453800/ENSBTAG00000014496	435	-0.717647	.	144144255	chr9	100452600	100453800	chr9:100452600-100453800	.	chr9	101910811	101910812	ENSBTAG00000014496	.
DMC119	chr9	100457800	101777925	chr9:100457800-100459400/ENSBTAG00000014494	576	-0.788235	.	108108255	chr9	100457800	100459400	chr9:100457800-100459400	.	chr9	101777925	101777926	ENSBTAG00000014494	.
DMC119	chr9	100457800	101910811	chr9:100457800-100459400/ENSBTAG00000014496	564	-0.782353	.	111111255	chr9	100457800	100459400	chr9:100457800-100459400	.	chr9	101910811	101910812	ENSBTAG00000014496	.
DMC119	chr9	100522000	101777925	chr9:100522000-100522200/ENSBTAG00000014494	458	-0.729412	.	138138255	chr9	100522000	100522200	chr9:100522000-100522200	.	chr9	101777925	101777926	ENSBTAG00000014494	.
DMC119	chr9	100620400	102048847	chr9:100620400-100621200/ENSBTAG00000052029	555	-0.777799	.	113113255	chr9	100620400	100621200	chr9:100620400-100621200	.	chr9	102048847	102048848	ENSBTAG00000052029	.
DMC119	chr9	100729770	101669800	chr9:101668600-101669800/ENSBTAG00000007758	470	-0.735294	.	135135255	chr9	101668600	101669800	chr9:101668600-101669800	.	chr9	100729770	100729771	ENSBTAG00000007758	.
DMC119	chr9	100729770	101828200	chr9:101826800-101828200/ENSBTAG00000007758	523	0.761765	.	255121121	chr9	101826800	101828200	chr9:101826800-101828200	.	chr9	100729770	100729771	ENSBTAG00000007758	.
DMC119	chr9	100729770	101854600	chr9:101853200-101854600/ENSBTAG00000007758	464	-0.732353	.	136136255	chr9	101853200	101854600	chr9:101853200-101854600	.	chr9	100729770	100729771	ENSBTAG00000007758	.
DMC119	chr9	100729770	101950000	chr9:101945400-101950000/ENSBTAG00000007758	641	-0.820588	.	91,91,255	chr9	101945400	101950000	chr9:101945400-101950000	.	chr9	100729770	100729771	ENSBTAG00000007758	.
DMC119	chr9	101038159	101542400	chr9:101541400-101542400/ENSBTAG00000051317	555	0.777844	.	255113113	chr9	101541400	101542400	chr9:101541400-101542400	.	chr9	101038159	101038160	ENSBTAG00000051317	.
DMC119	chr9	101059200	101777925	chr9:101059200-101061000/ENSBTAG00000014494	535	-0.767647	.	118118255	chr9	101059200	101061000	chr9:101059200-101061000	.	chr9	101777925	101777926	ENSBTAG00000014494	.
DMC119	chr9	101059200	101910811	chr9:101059200-101061000/ENSBTAG00000014496	482	-0.741176	.	132132255	chr9	101059200	101061000	chr9:101059200-101061000	.	chr9	101910811	101910812	ENSBTAG00000014496	.
DMC119	chr9	101062800	101777925	chr9:101062800-101063800/ENSBTAG00000014494	658	-0.829412	.	87,87,255	chr9	101062800	101063800	chr9:101062800-101063800	.	chr9	101777925	101777926	ENSBTAG00000014494	.
DMC119	chr9	101062800	101910811	chr9:101062800-101063800/ENSBTAG00000014496	494	-0.747059	.	129129255	chr9	101062800	101063800	chr9:101062800-101063800	.	chr9	101910811	101910812	ENSBTAG00000014496	.
DMC119	chr9	101207400	102029738	chr9:101207400-101208200/ENSBTAG00000014498	539	0.769915	.	255117117	chr9	101207400	101208200	chr9:101207400-101208200	.	chr9	102029738	102029739	ENSBTAG00000014498	.
DMC119	chr9	101260400	101777925	chr9:101260400-101263400/ENSBTAG00000014494	529	-0.764706	.	120120255	chr9	101260400	101263400	chr9:101260400-101263400	.	chr9	101777925	101777926	ENSBTAG00000014494	.
DMC119	chr9	101267000	101777925	chr9:101267000-101271600/ENSBTAG00000014494	452	-0.726471	.	139139255	chr9	101267000	101271600	chr9:101267000-101271600	.	chr9	101777925	101777926	ENSBTAG00000014494	.
DMC119	chr9	101321600	101777925	chr9:101321600-101324400/ENSBTAG00000014494	552	0.776471	.	255114114	chr9	101321600	101324400	chr9:101321600-101324400	.	chr9	101777925	101777926	ENSBTAG00000014494	.
DMC119	chr9	101321600	101910811	chr9:101321600-101324400/ENSBTAG00000014496	464	0.732353	.	255136136	chr9	101321600	101324400	chr9:101321600-101324400	.	chr9	101910811	101910812	ENSBTAG00000014496	.
DMC119	chr9	101365000	102029738	chr9:101365000-101365800/ENSBTAG00000014498	492	0.746316	.	255129129	chr9	101365000	101365800	chr9:101365000-101365800	.	chr9	102029738	102029739	ENSBTAG00000014498	.
DMC119	chr9	101411200	101777925	chr9:101411200-101413400/ENSBTAG00000014494	594	-0.797059	.	103103255	chr9	101411200	101413400	chr9:101411200-101413400	.	chr9	101777925	101777926	ENSBTAG00000014494	.
DMC119	chr9	101411200	101910811	chr9:101411200-101413400/ENSBTAG00000014496	564	-0.782353	.	111111255	chr9	101411200	101413400	chr9:101411200-101413400	.	chr9	101910811	101910812	ENSBTAG00000014496	.
DMC119	chr9	101466200	101777925	chr9:101466200-101467600/ENSBTAG00000014494	582	-0.791176	.	106106255	chr9	101466200	101467600	chr9:101466200-101467600	.	chr9	101777925	101777926	ENSBTAG00000014494	.
DMC118	chr9	15122800	19256542	chr9:15122800-15127000/ENSBTAG00000055014	741	-0.870588	.	66,66,255	chr9	15122800	15127000	chr9:15122800-15127000	.	chr9	19256542	19256543	ENSBTAG00000055014	.
DMC118	chr9	15140600	18706677	chr9:15140600-15141800/ENSBTAG00000049267	511	-0.755882	.	124124255	chr9	15140600	15141800	chr9:15140600-15141800	.	chr9	18706677	18706678	ENSBTAG00000049267	.
DMC118	chr9	15140600	19641142	chr9:15140600-15141800/ENSBTAG00000015498	482	-0.741176	.	132132255	chr9	15140600	15141800	chr9:15140600-15141800	.	chr9	19641142	19641143	ENSBTAG00000015498	.
DMC118	chr9	15414600	19702310	chr9:15414600-15417600/ENSBTAG00000005456	599	-0.8	.	102102255	chr9	15414600	15417600	chr9:15414600-15417600	.	chr9	19702310	19702311	ENSBTAG00000005456	.
DMC118	chr9	15437800	19702310	chr9:15437800-15443200/ENSBTAG00000005456	594	-0.797059	.	103103255	chr9	15437800	15443200	chr9:15437800-15443200	.	chr9	19702310	19702311	ENSBTAG00000005456	.
DMC118	chr9	15448000	19702310	chr9:15448000-15449400/ENSBTAG00000005456	564	-0.782353	.	111111255	chr9	15448000	15449400	chr9:15448000-15449400	.	chr9	19702310	19702311	ENSBTAG00000005456	.
DMC118	chr9	15461668	19713800	chr9:19713000-19713800/ENSBTAG00000016751	658	-0.829412	.	87,87,255	chr9	19713000	19713800	chr9:19713000-19713800	.	chr9	15461668	15461669	ENSBTAG00000016751	.
DMC118	chr9	17337602	18850400	chr9:18849000-18850400/ENSBTAG00000054151	445	-0.722717	.	141141255	chr9	18849000	18850400	chr9:18849000-18850400	.	chr9	17337602	17337603	ENSBTAG00000054151	.
DMR2	chr1	93276200	95406498	chr1:93276200-93279200/ENSBTAG00000019376	552	-0.776471	.	114114255	chr1	93276200	93279200	chr1:93276200-93279200	.	chr1	95406498	95406499	ENSBTAG00000019376	.
DMR2	chr1	93283800	95406498	chr1:93283800-93285600/ENSBTAG00000019376	458	-0.729412	.	138138255	chr1	93283800	93285600	chr1:93283800-93285600	.	chr1	95406498	95406499	ENSBTAG00000019376	.
DMR2	chr1	93288400	95406498	chr1:93288400-93292200/ENSBTAG00000019376	494	-0.747059	.	129129255	chr1	93288400	93292200	chr1:93288400-93292200	.	chr1	95406498	95406499	ENSBTAG00000019376	.
DMR2	chr1	93559800	95406498	chr1:93559800-93562200/ENSBTAG00000019376	599	-0.8	.	102102255	chr1	93559800	93562200	chr1:93559800-93562200	.	chr1	95406498	95406499	ENSBTAG00000019376	.
DMR2	chr1	93604400	95406498	chr1:93604400-93605000/ENSBTAG00000019376	547	-0.773529	.	115115255	chr1	93604400	93605000	chr1:93604400-93605000	.	chr1	95406498	95406499	ENSBTAG00000019376	.
DMR2	chr1	94320196	95434800	chr1:95430000-95434800/ENSBTAG00000031802	456	0.728477	.	255138138	chr1	95430000	95434800	chr1:95430000-95434800	.	chr1	94320196	94320197	ENSBTAG00000031802	.
DMR2	chr1	94818555	95396600	chr1:95390000-95396600/ENSBTAG00000020073	541	-0.770588	.	117117255	chr1	95390000	95396600	chr1:95390000-95396600	.	chr1	94818555	94818556	ENSBTAG00000020073	.
DMR2	chr1	94818555	95403400	chr1:95401400-95403400/ENSBTAG00000020073	570	-0.785294	.	109109255	chr1	95401400	95403400	chr1:95401400-95403400	.	chr1	94818555	94818556	ENSBTAG00000020073	.
DMR2	chr1	94818555	95434800	chr1:95430000-95434800/ENSBTAG00000020073	717	-0.858824	.	72,72,255	chr1	95430000	95434800	chr1:95430000-95434800	.	chr1	94818555	94818556	ENSBTAG00000020073	.
DMR2	chr1	94818555	95440800	chr1:95435600-95440800/ENSBTAG00000020073	517	-0.758824	.	123123255	chr1	95435600	95440800	chr1:95435600-95440800	.	chr1	94818555	94818556	ENSBTAG00000020073	.
DMR2	chr1	94818555	95450800	chr1:95446200-95450800/ENSBTAG00000020073	452	-0.726471	.	139139255	chr1	95446200	95450800	chr1:95446200-95450800	.	chr1	94818555	94818556	ENSBTAG00000020073	.
DMR2	chr1	94818555	95482600	chr1:95481800-95482600/ENSBTAG00000020073	576	-0.788235	.	108108255	chr1	95481800	95482600	chr1:95481800-95482600	.	chr1	94818555	94818556	ENSBTAG00000020073	.
DMR2	chr1	94926600	95406498	chr1:94926600-94936400/ENSBTAG00000019376	523	0.761765	.	255121121	chr1	94926600	94936400	chr1:94926600-94936400	.	chr1	95406498	95406499	ENSBTAG00000019376	.
DMR2	chr1	94950600	95406498	chr1:94950600-94958200/ENSBTAG00000019376	535	0.767647	.	255118118	chr1	94950600	94958200	chr1:94950600-94958200	.	chr1	95406498	95406499	ENSBTAG00000019376	.
DMR2	chr1	94967600	95406498	chr1:94967600-94976200/ENSBTAG00000019376	441	0.720588	.	255142142	chr1	94967600	94976200	chr1:94967600-94976200	.	chr1	95406498	95406499	ENSBTAG00000019376	.
DMR2	chr1	94985031	95396600	chr1:95390000-95396600/ENSBTAG00000018994	535	0.767647	.	255118118	chr1	95390000	95396600	chr1:95390000-95396600	.	chr1	94985031	94985032	ENSBTAG00000018994	.
DMR3	chr1	97562712	99909000	chr1:99905400-99909000/ENSBTAG00000006409	564	0.782353	.	255111111	chr1	99905400	99909000	chr1:99905400-99909000	.	chr1	97562712	97562713	ENSBTAG00000006409	.
DMR3	chr1	98662615	99909000	chr1:99905400-99909000/ENSBTAG00000054693	469	0.734516	.	255135135	chr1	99905400	99909000	chr1:99905400-99909000	.	chr1	98662615	98662616	ENSBTAG00000054693	.
DMR3	chr1	99743550	99909000	chr1:99905400-99909000/ENSBTAG00000012708	505	0.752941	.	255126126	chr1	99905400	99909000	chr1:99905400-99909000	.	chr1	99743550	99743551	ENSBTAG00000012708	.
DMR3	chr1	99823209	99909000	chr1:99905400-99909000/ENSBTAG00000031618	671	0.835914	.	255,83,83	chr1	99905400	99909000	chr1:99905400-99909000	.	chr1	99823209	99823210	ENSBTAG00000031618	.
DMR3	chr1	99905400	99995832	chr1:99905400-99909000/ENSBTAG00000011423	540	0.770235	.	255117117	chr1	99905400	99909000	chr1:99905400-99909000	.	chr1	99995832	99995833	ENSBTAG00000011423	.
DMR14	chr10	8336670	9844400	chr10:9841800-9844400/ENSBTAG00000020205	441	0.720588	.	255142142	chr10	9841800	9844400	chr10:9841800-9844400	.	chr10	8336670	8336671	ENSBTAG00000020205	.
DMR14	chr10	8336670	9996000	chr10:9987600-9996000/ENSBTAG00000020205	623	0.811765	.	255,96,96	chr10	9987600	9996000	chr10:9987600-9996000	.	chr10	8336670	8336671	ENSBTAG00000020205	.
DMR14	chr10	8512400	9403959	chr10:8512400-8514600/ENSBTAG00000007371	435	0.717647	.	255144144	chr10	8512400	8514600	chr10:8512400-8514600	.	chr10	9403959	9403960	ENSBTAG00000007371	.
DMR16	chr11	105124600	105450692	chr11:105124600-105125600/ENSBTAG00000048155	570	-0.785294	.	109109255	chr11	105124600	105125600	chr11:105124600-105125600	.	chr11	105450692	105450693	ENSBTAG00000048155	.
DMR15	chr11	36831220	37304200	chr11:37303800-37304200/ENSBTAG00000006852	635	-0.817647	.	93,93,255	chr11	37303800	37304200	chr11:37303800-37304200	.	chr11	36831220	36831221	ENSBTAG00000006852	.
DMR17	chr12	75069200	76728113	chr12:75069200-75070800/ENSBTAG00000046271	474	-0.737396	.	134134255	chr12	75069200	75070800	chr12:75069200-75070800	.	chr12	76728113	76728114	ENSBTAG00000046271	.
DMR17	chr12	75465600	76709639	chr12:75465600-75467000/ENSBTAG00000049957	576	0.788147	.	255108108	chr12	75465600	75467000	chr12:75465600-75467000	.	chr12	76709639	76709640	ENSBTAG00000049957	.
DMR17	chr12	75465600	76738408	chr12:75465600-75467000/ENSBTAG00000025246	505	0.752941	.	255126126	chr12	75465600	75467000	chr12:75465600-75467000	.	chr12	76738408	76738409	ENSBTAG00000025246	.
DMR17	chr12	75557200	76728113	chr12:75557200-75560800/ENSBTAG00000046271	486	-0.743366	.	131131255	chr12	75557200	75560800	chr12:75557200-75560800	.	chr12	76728113	76728114	ENSBTAG00000046271	.
DMR17	chr12	75597400	76709639	chr12:75597400-75600400/ENSBTAG00000049957	438	-0.719483	.	143143255	chr12	75597400	75600400	chr12:75597400-75600400	.	chr12	76709639	76709640	ENSBTAG00000049957	.
DMR17	chr12	75597400	76728113	chr12:75597400-75600400/ENSBTAG00000046271	773	-0.886666	.	57,57,255	chr12	75597400	75600400	chr12:75597400-75600400	.	chr12	76728113	76728114	ENSBTAG00000046271	.
DMR17	chr12	75597400	76738408	chr12:75597400-75600400/ENSBTAG00000025246	488	-0.744118	.	130130255	chr12	75597400	75600400	chr12:75597400-75600400	.	chr12	76738408	76738409	ENSBTAG00000025246	.
DMR17	chr12	75662955	76663400	chr12:76661800-76663400/ENSBTAG00000004440	629	-0.814706	.	94,94,255	chr12	76661800	76663400	chr12:76661800-76663400	.	chr12	75662955	75662956	ENSBTAG00000004440	.
DMR17	chr12	75662955	76713400	chr12:76712400-76713400/ENSBTAG00000004440	529	-0.764706	.	120120255	chr12	76712400	76713400	chr12:76712400-76713400	.	chr12	75662955	75662956	ENSBTAG00000004440	.
DMR17	chr12	75662955	76719200	chr12:76715800-76719200/ENSBTAG00000004440	670	-0.835294	.	84,84,255	chr12	76715800	76719200	chr12:76715800-76719200	.	chr12	75662955	75662956	ENSBTAG00000004440	.
DMR17	chr12	75662955	76744600	chr12:76742400-76744600/ENSBTAG00000004440	658	-0.829412	.	87,87,255	chr12	76742400	76744600	chr12:76742400-76744600	.	chr12	75662955	75662956	ENSBTAG00000004440	.
DMR17	chr12	75662955	76750600	chr12:76745000-76750600/ENSBTAG00000004440	476	-0.738235	.	133133255	chr12	76745000	76750600	chr12:76745000-76750600	.	chr12	75662955	75662956	ENSBTAG00000004440	.
DMR17	chr12	75690600	76738408	chr12:75690600-75692600/ENSBTAG00000025246	505	-0.752941	.	126126255	chr12	75690600	75692600	chr12:75690600-75692600	.	chr12	76738408	76738409	ENSBTAG00000025246	.
DMR17	chr12	75800800	76709639	chr12:75800800-75801200/ENSBTAG00000049957	636	0.818002	.	255,92,92	chr12	75800800	75801200	chr12:75800800-75801200	.	chr12	76709639	76709640	ENSBTAG00000049957	.
DMR17	chr12	75800800	76738408	chr12:75800800-75801200/ENSBTAG00000025246	582	0.791176	.	255106106	chr12	75800800	75801200	chr12:75800800-75801200	.	chr12	76738408	76738409	ENSBTAG00000025246	.
DMR17	chr12	75882600	76738408	chr12:75882600-75882800/ENSBTAG00000025246	452	0.726471	.	255139139	chr12	75882600	75882800	chr12:75882600-75882800	.	chr12	76738408	76738409	ENSBTAG00000025246	.
DMR17	chr12	75894298	76601800	chr12:76601000-76601800/ENSBTAG00000010395	594	0.797059	.	255103103	chr12	76601000	76601800	chr12:76601000-76601800	.	chr12	75894298	75894299	ENSBTAG00000010395	.
DMR17	chr12	75894298	76659400	chr12:76658200-76659400/ENSBTAG00000010395	482	0.741176	.	255132132	chr12	76658200	76659400	chr12:76658200-76659400	.	chr12	75894298	75894299	ENSBTAG00000010395	.
DMR17	chr12	75894298	76665400	chr12:76664200-76665400/ENSBTAG00000010395	494	0.747059	.	255129129	chr12	76664200	76665400	chr12:76664200-76665400	.	chr12	75894298	75894299	ENSBTAG00000010395	.
DMR17	chr12	75894298	76750600	chr12:76745000-76750600/ENSBTAG00000010395	458	0.729412	.	255138138	chr12	76745000	76750600	chr12:76745000-76750600	.	chr12	75894298	75894299	ENSBTAG00000010395	.
DMR17	chr12	75911400	76728113	chr12:75911400-75913400/ENSBTAG00000046271	486	0.743366	.	255131131	chr12	75911400	75913400	chr12:75911400-75913400	.	chr12	76728113	76728114	ENSBTAG00000046271	.
DMR17	chr12	75932200	76709639	chr12:75932200-75935000/ENSBTAG00000049957	725	0.862783	.	255,70,70	chr12	75932200	75935000	chr12:75932200-75935000	.	chr12	76709639	76709640	ENSBTAG00000049957	.
DMR17	chr12	75932200	76738408	chr12:75932200-75935000/ENSBTAG00000025246	758	0.879412	.	255,61,61	chr12	75932200	75935000	chr12:75932200-75935000	.	chr12	76738408	76738409	ENSBTAG00000025246	.
DMR17	chr12	76121780	76473200	chr12:76470400-76473200/ENSBTAG00000002240	627	-0.813834	.	95,95,255	chr12	76470400	76473200	chr12:76470400-76473200	.	chr12	76121780	76121781	ENSBTAG00000002240	.
DMR17	chr12	76121780	76659400	chr12:76658200-76659400/ENSBTAG00000002240	577	-0.788816	.	107107255	chr12	76658200	76659400	chr12:76658200-76659400	.	chr12	76121780	76121781	ENSBTAG00000002240	.
DMR17	chr12	76121780	76713400	chr12:76712400-76713400/ENSBTAG00000002240	509	-0.754967	.	125125255	chr12	76712400	76713400	chr12:76712400-76713400	.	chr12	76121780	76121781	ENSBTAG00000002240	.
DMR17	chr12	76121780	76744600	chr12:76742400-76744600/ENSBTAG00000002240	480	-0.74025	.	132132255	chr12	76742400	76744600	chr12:76742400-76744600	.	chr12	76121780	76121781	ENSBTAG00000002240	.
DMR17	chr12	76121780	76750600	chr12:76745000-76750600/ENSBTAG00000002240	471	-0.735835	.	134134255	chr12	76745000	76750600	chr12:76745000-76750600	.	chr12	76121780	76121781	ENSBTAG00000002240	.
DMR17	chr12	76126400	76738408	chr12:76126400-76128000/ENSBTAG00000025246	458	-0.729412	.	138138255	chr12	76126400	76128000	chr12:76126400-76128000	.	chr12	76738408	76738409	ENSBTAG00000025246	.
DMR17	chr12	76166800	76709639	chr12:76166800-76168800/ENSBTAG00000049957	791	-0.895622	.	53,53,255	chr12	76166800	76168800	chr12:76166800-76168800	.	chr12	76709639	76709640	ENSBTAG00000049957	.
DMR17	chr12	76166800	76738408	chr12:76166800-76168800/ENSBTAG00000025246	741	-0.870588	.	66,66,255	chr12	76166800	76168800	chr12:76166800-76168800	.	chr12	76738408	76738409	ENSBTAG00000025246	.
DMR17	chr12	76180037	76473200	chr12:76470400-76473200/ENSBTAG00000032084	652	-0.826471	.	88,88,255	chr12	76470400	76473200	chr12:76470400-76473200	.	chr12	76180037	76180038	ENSBTAG00000032084	.
DMR17	chr12	76188000	76709639	chr12:76188000-76194400/ENSBTAG00000049957	498	-0.749337	.	128128255	chr12	76188000	76194400	chr12:76188000-76194400	.	chr12	76709639	76709640	ENSBTAG00000049957	.
DMR17	chr12	76188000	76728113	chr12:76188000-76194400/ENSBTAG00000046271	600	-0.800089	.	102102255	chr12	76188000	76194400	chr12:76188000-76194400	.	chr12	76728113	76728114	ENSBTAG00000046271	.
DMR17	chr12	76188000	76738408	chr12:76188000-76194400/ENSBTAG00000025246	464	-0.732353	.	136136255	chr12	76188000	76194400	chr12:76188000-76194400	.	chr12	76738408	76738409	ENSBTAG00000025246	.
DMR17	chr12	76201200	76728113	chr12:76201200-76209800/ENSBTAG00000046271	665	-0.832929	.	85,85,255	chr12	76201200	76209800	chr12:76201200-76209800	.	chr12	76728113	76728114	ENSBTAG00000046271	.
DMR17	chr12	76267138	76713400	chr12:76712400-76713400/ENSBTAG00000038268	484	-0.742193	.	131131255	chr12	76712400	76713400	chr12:76712400-76713400	.	chr12	76267138	76267139	ENSBTAG00000038268	.
DMR20	chr13	57465706	57723400	chr13:57723000-57723400/ENSBTAG00000017475	611	0.805882	.	255,99,99	chr13	57723000	57723400	chr13:57723000-57723400	.	chr13	57465706	57465707	ENSBTAG00000017475	.
DMR20	chr13	57467800	58563618	chr13:57467800-57469400/ENSBTAG00000012406	429	0.714706	.	255145145	chr13	57467800	57469400	chr13:57467800-57469400	.	chr13	58563618	58563619	ENSBTAG00000012406	.
DMR20	chr13	57484014	57890400	chr13:57889200-57890400/ENSBTAG00000052413	582	0.791176	.	255106106	chr13	57889200	57890400	chr13:57889200-57890400	.	chr13	57484014	57484015	ENSBTAG00000052413	.
DMR20	chr13	57484014	58023000	chr13:58022600-58023000/ENSBTAG00000052413	494	-0.747059	.	129129255	chr13	58022600	58023000	chr13:58022600-58023000	.	chr13	57484014	57484015	ENSBTAG00000052413	.
DMR21	chr13	57516200	58563618	chr13:57516200-57518800/ENSBTAG00000012406	482	-0.741176	.	132132255	chr13	57516200	57518800	chr13:57516200-57518800	.	chr13	58563618	58563619	ENSBTAG00000012406	.
DMR21	chr13	57532635	58011400	chr13:58010800-58011400/ENSBTAG00000047223	599	0.8	.	255102102	chr13	58010800	58011400	chr13:58010800-58011400	.	chr13	57532635	57532636	ENSBTAG00000047223	.
DMR21	chr13	57465706	57723400	chr13:57723000-57723400/ENSBTAG00000017475	611	0.805882	.	255,99,99	chr13	57723000	57723400	chr13:57723000-57723400	.	chr13	57465706	57465707	ENSBTAG00000017475	.
DMR21	chr13	57467800	58563618	chr13:57467800-57469400/ENSBTAG00000012406	429	0.714706	.	255145145	chr13	57467800	57469400	chr13:57467800-57469400	.	chr13	58563618	58563619	ENSBTAG00000012406	.
DMR21	chr13	57484014	57890400	chr13:57889200-57890400/ENSBTAG00000052413	582	0.791176	.	255106106	chr13	57889200	57890400	chr13:57889200-57890400	.	chr13	57484014	57484015	ENSBTAG00000052413	.
DMR21	chr13	57484014	58023000	chr13:58022600-58023000/ENSBTAG00000052413	494	-0.747059	.	129129255	chr13	58022600	58023000	chr13:58022600-58023000	.	chr13	57484014	57484015	ENSBTAG00000052413	.
DMR18	chr13	19546000	19971622	chr13:19546000-19546600/ENSBTAG00000015910	458	0.729412	.	255138138	chr13	19546000	19546600	chr13:19546000-19546600	.	chr13	19971622	19971623	ENSBTAG00000015910	.
DMR18	chr13	19635324	19751200	chr13:19748600-19751200/ENSBTAG00000019866	541	0.770588	.	255117117	chr13	19748600	19751200	chr13:19748600-19751200	.	chr13	19635324	19635325	ENSBTAG00000019866	.
DMR18	chr13	19635324	19772000	chr13:19764200-19772000/ENSBTAG00000019866	682	0.841176	.	255,81,81	chr13	19764200	19772000	chr13:19764200-19772000	.	chr13	19635324	19635325	ENSBTAG00000019866	.
DMR18	chr13	19635324	19923200	chr13:19919800-19923200/ENSBTAG00000019866	688	0.844118	.	255,79,79	chr13	19919800	19923200	chr13:19919800-19923200	.	chr13	19635324	19635325	ENSBTAG00000019866	.
DMR18	chr13	19639800	19971622	chr13:19639800-19643200/ENSBTAG00000015910	447	0.723529	.	255141141	chr13	19639800	19643200	chr13:19639800-19643200	.	chr13	19971622	19971623	ENSBTAG00000015910	.
DMR18	chr13	19674800	19971622	chr13:19674800-19675400/ENSBTAG00000015910	500	0.75	.	255127127	chr13	19674800	19675400	chr13:19674800-19675400	.	chr13	19971622	19971623	ENSBTAG00000015910	.
DMR18	chr13	19680400	19971622	chr13:19680400-19681600/ENSBTAG00000015910	670	0.835294	.	255,84,84	chr13	19680400	19681600	chr13:19680400-19681600	.	chr13	19971622	19971623	ENSBTAG00000015910	.
DMR22	chr14	16165840	16529200	chr14:16522800-16529200/ENSBTAG00000005585	517	0.758824	.	255123123	chr14	16522800	16529200	chr14:16522800-16529200	.	chr14	16165840	16165841	ENSBTAG00000005585	.
DMR22	chr14	16165840	16961400	chr14:16961000-16961400/ENSBTAG00000005585	664	-0.832353	.	85,85,255	chr14	16961000	16961400	chr14:16961000-16961400	.	chr14	16165840	16165841	ENSBTAG00000005585	.
DMR22	chr14	16228870	16950400	chr14:16948600-16950400/ENSBTAG00000016754	529	0.764706	.	255120120	chr14	16948600	16950400	chr14:16948600-16950400	.	chr14	16228870	16228871	ENSBTAG00000016754	.
DMR22	chr14	16328949	16764000	chr14:16761000-16764000/ENSBTAG00000016194	447	0.723529	.	255141141	chr14	16761000	16764000	chr14:16761000-16764000	.	chr14	16328949	16328950	ENSBTAG00000016194	.
DMR22	chr14	16335278	16387600	chr14:16386200-16387600/ENSBTAG00000049478	564	-0.782353	.	111111255	chr14	16386200	16387600	chr14:16386200-16387600	.	chr14	16335278	16335279	ENSBTAG00000049478	.
DMR22	chr14	16335278	16907000	chr14:16901400-16907000/ENSBTAG00000049478	488	0.744118	.	255130130	chr14	16901400	16907000	chr14:16901400-16907000	.	chr14	16335278	16335279	ENSBTAG00000049478	.
DMR23	chr14	61406000	62384855	chr14:61406000-61406400/ENSBTAG00000026963	494	0.747059	.	255129129	chr14	61406000	61406400	chr14:61406000-61406400	.	chr14	62384855	62384856	ENSBTAG00000026963	.
DMR23	chr14	61450792	62706800	chr14:62704400-62706800/ENSBTAG00000013513	494	-0.747059	.	129129255	chr14	62704400	62706800	chr14:62704400-62706800	.	chr14	61450792	61450793	ENSBTAG00000013513	.
DMR25	chr16	78582200	79278728	chr16:78582200-78582600/ENSBTAG00000021874	605	-0.802941	.	100100255	chr16	78582200	78582600	chr16:78582200-78582600	.	chr16	79278728	79278729	ENSBTAG00000021874	.
DMR25	chr16	78828931	79388400	chr16:79387600-79388400/ENSBTAG00000009265	580	-0.790287	.	107107255	chr16	79387600	79388400	chr16:79387600-79388400	.	chr16	78828931	78828932	ENSBTAG00000009265	.
DMR27	chr18	55427200	55530826	chr18:55427200-55427400/ENSBTAG00000013340	470	-0.735294	.	135135255	chr18	55427200	55427400	chr18:55427200-55427400	.	chr18	55530826	55530827	ENSBTAG00000013340	.
DMR29	chr19	58020000	59035767	chr19:58020000-58021000/ENSBTAG00000051578	575	0.787568	.	255108108	chr19	58020000	58021000	chr19:58020000-58021000	.	chr19	59035767	59035768	ENSBTAG00000051578	.
DMR29	chr19	58154978	58595200	chr19:58592600-58595200/ENSBTAG00000017136	451	0.725667	.	255139139	chr19	58592600	58595200	chr19:58592600-58595200	.	chr19	58154978	58154979	ENSBTAG00000017136	.
DMR29	chr19	58154978	58654200	chr19:58653400-58654200/ENSBTAG00000017136	587	0.793514	.	255105105	chr19	58653400	58654200	chr19:58653400-58654200	.	chr19	58154978	58154979	ENSBTAG00000017136	.
DMR29	chr19	58154978	58675400	chr19:58675200-58675400/ENSBTAG00000017136	545	0.772865	.	255116116	chr19	58675200	58675400	chr19:58675200-58675400	.	chr19	58154978	58154979	ENSBTAG00000017136	.
DMR29	chr19	58154978	58709000	chr19:58707800-58709000/ENSBTAG00000017136	469	0.734516	.	255135135	chr19	58707800	58709000	chr19:58707800-58709000	.	chr19	58154978	58154979	ENSBTAG00000017136	.
DMR29	chr19	58154978	60198200	chr19:60191600-60198200/ENSBTAG00000017136	699	0.849561	.	255,76,76	chr19	60191600	60198200	chr19:60191600-60198200	.	chr19	58154978	58154979	ENSBTAG00000017136	.
DMR29	chr19	58154978	60245000	chr19:60229600-60245000/ENSBTAG00000017136	539	0.769915	.	255117117	chr19	60229600	60245000	chr19:60229600-60245000	.	chr19	58154978	58154979	ENSBTAG00000017136	.
DMR29	chr19	58154978	60339200	chr19:60338400-60339200/ENSBTAG00000017136	445	0.722717	.	255141141	chr19	60338400	60339200	chr19:60338400-60339200	.	chr19	58154978	58154979	ENSBTAG00000017136	.
DMR29	chr19	58209287	59965200	chr19:59964800-59965200/ENSBTAG00000018837	505	0.752941	.	255126126	chr19	59964800	59965200	chr19:59964800-59965200	.	chr19	58209287	58209288	ENSBTAG00000018837	.
DMR29	chr19	58216400	60652364	chr19:58216400-58216600/ENSBTAG00000024903	581	0.790564	.	255106106	chr19	58216400	58216600	chr19:58216400-58216600	.	chr19	60652364	60652365	ENSBTAG00000024903	.
DMR29	chr19	58260600	59236559	chr19:58260600-58263800/ENSBTAG00000053529	514	0.757128	.	255123123	chr19	58260600	58263800	chr19:58260600-58263800	.	chr19	59236559	59236560	ENSBTAG00000053529	.
DMR29	chr19	58260600	60652364	chr19:58260600-58263800/ENSBTAG00000024903	433	0.716817	.	255144144	chr19	58260600	58263800	chr19:58260600-58263800	.	chr19	60652364	60652365	ENSBTAG00000024903	.
DMR29	chr19	58308200	59236559	chr19:58308200-58308400/ENSBTAG00000053529	677	0.83881	.	255,82,82	chr19	58308200	58308400	chr19:58308200-58308400	.	chr19	59236559	59236560	ENSBTAG00000053529	.
DMR29	chr19	58308200	60652364	chr19:58308200-58308400/ENSBTAG00000024903	433	0.716817	.	255144144	chr19	58308200	58308400	chr19:58308200-58308400	.	chr19	60652364	60652365	ENSBTAG00000024903	.
DMR29	chr19	58317200	59236559	chr19:58317200-58317400/ENSBTAG00000053529	570	0.785403	.	255109109	chr19	58317200	58317400	chr19:58317200-58317400	.	chr19	59236559	59236560	ENSBTAG00000053529	.
DMR29	chr19	58346000	60618841	chr19:58346000-58346200/ENSBTAG00000008294	541	-0.770588	.	117117255	chr19	58346000	58346200	chr19:58346000-58346200	.	chr19	60618841	60618842	ENSBTAG00000008294	.
DMR29	chr19	58458000	60652364	chr19:58458000-58459400/ENSBTAG00000024903	433	0.716817	.	255144144	chr19	58458000	58459400	chr19:58458000-58459400	.	chr19	60652364	60652365	ENSBTAG00000024903	.
DMR29	chr19	58506800	59236559	chr19:58506800-58508600/ENSBTAG00000053529	633	0.816819	.	255,93,93	chr19	58506800	58508600	chr19:58506800-58508600	.	chr19	59236559	59236560	ENSBTAG00000053529	.
DMR29	chr19	58506800	60652364	chr19:58506800-58508600/ENSBTAG00000024903	486	0.743366	.	255131131	chr19	58506800	58508600	chr19:58506800-58508600	.	chr19	60652364	60652365	ENSBTAG00000024903	.
DMR29	chr19	58528879	58595200	chr19:58592600-58595200/ENSBTAG00000055157	447	0.723529	.	255141141	chr19	58592600	58595200	chr19:58592600-58595200	.	chr19	58528879	58528880	ENSBTAG00000055157	.
DMR29	chr19	58528879	58630600	chr19:58629800-58630600/ENSBTAG00000055157	482	0.741176	.	255132132	chr19	58629800	58630600	chr19:58629800-58630600	.	chr19	58528879	58528880	ENSBTAG00000055157	.
DMR29	chr19	58528879	58654200	chr19:58653400-58654200/ENSBTAG00000055157	558	0.779412	.	255112112	chr19	58653400	58654200	chr19:58653400-58654200	.	chr19	58528879	58528880	ENSBTAG00000055157	.
DMR29	chr19	58528879	58675000	chr19:58673600-58675000/ENSBTAG00000055157	694	0.847059	.	255,78,78	chr19	58673600	58675000	chr19:58673600-58675000	.	chr19	58528879	58528880	ENSBTAG00000055157	.
DMR29	chr19	58528879	58675400	chr19:58675200-58675400/ENSBTAG00000055157	494	0.747059	.	255129129	chr19	58675200	58675400	chr19:58675200-58675400	.	chr19	58528879	58528880	ENSBTAG00000055157	.
DMR29	chr19	58528879	58709000	chr19:58707800-58709000/ENSBTAG00000055157	629	0.814706	.	255,94,94	chr19	58707800	58709000	chr19:58707800-58709000	.	chr19	58528879	58528880	ENSBTAG00000055157	.
DMR29	chr19	58528879	58714000	chr19:58713600-58714000/ENSBTAG00000055157	570	0.785294	.	255109109	chr19	58713600	58714000	chr19:58713600-58714000	.	chr19	58528879	58528880	ENSBTAG00000055157	.
DMR29	chr19	58528879	58859600	chr19:58859400-58859600/ENSBTAG00000055157	435	0.717647	.	255144144	chr19	58859400	58859600	chr19:58859400-58859600	.	chr19	58528879	58528880	ENSBTAG00000055157	.
DMR29	chr19	58528879	58879800	chr19:58879400-58879800/ENSBTAG00000055157	511	0.755882	.	255124124	chr19	58879400	58879800	chr19:58879400-58879800	.	chr19	58528879	58528880	ENSBTAG00000055157	.
DMR29	chr19	58528879	59242200	chr19:59241400-59242200/ENSBTAG00000055157	788	0.894118	.	255,54,54	chr19	59241400	59242200	chr19:59241400-59242200	.	chr19	58528879	58528880	ENSBTAG00000055157	.
DMR29	chr19	58528879	59989000	chr19:59988400-59989000/ENSBTAG00000055157	652	0.826471	.	255,88,88	chr19	59988400	59989000	chr19:59988400-59989000	.	chr19	58528879	58528880	ENSBTAG00000055157	.
DMR29	chr19	58528879	60198200	chr19:60191600-60198200/ENSBTAG00000055157	629	0.814706	.	255,94,94	chr19	60191600	60198200	chr19:60191600-60198200	.	chr19	58528879	58528880	ENSBTAG00000055157	.
DMR29	chr19	58528879	60210800	chr19:60207000-60210800/ENSBTAG00000055157	500	0.75	.	255127127	chr19	60207000	60210800	chr19:60207000-60210800	.	chr19	58528879	58528880	ENSBTAG00000055157	.
DMR29	chr19	58528879	60245000	chr19:60229600-60245000/ENSBTAG00000055157	723	0.861765	.	255,70,70	chr19	60229600	60245000	chr19:60229600-60245000	.	chr19	58528879	58528880	ENSBTAG00000055157	.
DMR29	chr19	58528879	60312600	chr19:60308400-60312600/ENSBTAG00000055157	458	0.729412	.	255138138	chr19	60308400	60312600	chr19:60308400-60312600	.	chr19	58528879	58528880	ENSBTAG00000055157	.
DMR29	chr19	58528879	60339200	chr19:60338400-60339200/ENSBTAG00000055157	858	0.929412	.	255,36,36	chr19	60338400	60339200	chr19:60338400-60339200	.	chr19	58528879	58528880	ENSBTAG00000055157	.
DMR29	chr19	58528879	60355600	chr19:60355000-60355600/ENSBTAG00000055157	488	0.744118	.	255130130	chr19	60355000	60355600	chr19:60355000-60355600	.	chr19	58528879	58528880	ENSBTAG00000055157	.
DMR29	chr19	58528879	60578400	chr19:60577600-60578400/ENSBTAG00000055157	599	0.8	.	255102102	chr19	60577600	60578400	chr19:60577600-60578400	.	chr19	58528879	58528880	ENSBTAG00000055157	.
DMR29	chr19	58528879	60629000	chr19:60627400-60629000/ENSBTAG00000055157	500	0.75	.	255127127	chr19	60627400	60629000	chr19:60627400-60629000	.	chr19	58528879	58528880	ENSBTAG00000055157	.
DMR29	chr19	58575000	58923174	chr19:58575000-58575200/ENSBTAG00000045824	748	0.874172	.	255,64,64	chr19	58575000	58575200	chr19:58575000-58575200	.	chr19	58923174	58923175	ENSBTAG00000045824	.
DMR29	chr19	58585200	59236559	chr19:58585200-58585600/ENSBTAG00000053529	743	0.871797	.	255,65,65	chr19	58585200	58585600	chr19:58585200-58585600	.	chr19	59236559	59236560	ENSBTAG00000053529	.
DMR30	chr20	66616744	68122600	chr20:68121200-68122600/ENSBTAG00000043282	511	-0.755882	.	124124255	chr20	68121200	68122600	chr20:68121200-68122600	.	chr20	66616744	66616745	ENSBTAG00000043282	.
DMR30	chr20	66751048	67719200	chr20:67719000-67719200/ENSBTAG00000048851	470	0.735294	.	255135135	chr20	67719000	67719200	chr20:67719000-67719200	.	chr20	66751048	66751049	ENSBTAG00000048851	.
DMR30	chr20	66751048	67774200	chr20:67773000-67774200/ENSBTAG00000048851	523	0.761765	.	255121121	chr20	67773000	67774200	chr20:67773000-67774200	.	chr20	66751048	66751049	ENSBTAG00000048851	.
DMR30	chr20	66751048	67922800	chr20:67920600-67922800/ENSBTAG00000048851	476	0.738235	.	255133133	chr20	67920600	67922800	chr20:67920600-67922800	.	chr20	66751048	66751049	ENSBTAG00000048851	.
DMR30	chr20	66751048	68217400	chr20:68215200-68217400/ENSBTAG00000048851	470	0.735294	.	255135135	chr20	68215200	68217400	chr20:68215200-68217400	.	chr20	66751048	66751049	ENSBTAG00000048851	.
DMR31	chr20	42082200	51049217	chr20:42082200-42083000/ENSBTAG00000025893	780	-0.890392	.	56,56,255	chr20	42082200	42083000	chr20:42082200-42083000	.	chr20	51049217	51049218	ENSBTAG00000025893	.
DMR31	chr20	42354761	50983400	chr20:50983000-50983400/ENSBTAG00000012992	605	-0.802941	.	100100255	chr20	50983000	50983400	chr20:50983000-50983400	.	chr20	42354761	42354762	ENSBTAG00000012992	.
DMR31	chr20	46626435	48922200	chr20:48921400-48922200/ENSBTAG00000051934	448	0.724141	.	255140140	chr20	48921400	48922200	chr20:48921400-48922200	.	chr20	46626435	46626436	ENSBTAG00000051934	.
DMR31	chr20	46730846	48888400	chr20:48888200-48888400/ENSBTAG00000018234	422	0.711192	.	255147147	chr20	48888200	48888400	chr20:48888200-48888400	.	chr20	46730846	46730847	ENSBTAG00000018234	.
DMR31	chr20	46730846	48922200	chr20:48921400-48922200/ENSBTAG00000018234	491	0.745921	.	255129129	chr20	48921400	48922200	chr20:48921400-48922200	.	chr20	46730846	46730847	ENSBTAG00000018234	.
DMR34	chr23	43050452	43296400	chr23:43294000-43296400/ENSBTAG00000014904	452	0.726471	.	255139139	chr23	43294000	43296400	chr23:43294000-43296400	.	chr23	43050452	43050453	ENSBTAG00000014904	.
DMR34	chr23	43050452	44332200	chr23:44331000-44332200/ENSBTAG00000014904	599	-0.8	.	102102255	chr23	44331000	44332200	chr23:44331000-44332200	.	chr23	43050452	43050453	ENSBTAG00000014904	.
DMR34	chr23	43050452	44456200	chr23:44453000-44456200/ENSBTAG00000014904	511	-0.755882	.	124124255	chr23	44453000	44456200	chr23:44453000-44456200	.	chr23	43050452	43050453	ENSBTAG00000014904	.
DMR34	chr23	43050452	44476000	chr23:44475000-44476000/ENSBTAG00000014904	582	-0.791176	.	106106255	chr23	44475000	44476000	chr23:44475000-44476000	.	chr23	43050452	43050453	ENSBTAG00000014904	.
DMR34	chr23	43050452	44504400	chr23:44498400-44504400/ENSBTAG00000014904	500	-0.75	.	127127255	chr23	44498400	44504400	chr23:44498400-44504400	.	chr23	43050452	43050453	ENSBTAG00000014904	.
DMR34	chr23	43077484	43276600	chr23:43275400-43276600/ENSBTAG00000048652	436	0.718454	.	255143143	chr23	43275400	43276600	chr23:43275400-43276600	.	chr23	43077484	43077485	ENSBTAG00000048652	.
DMR34	chr23	43077484	43296400	chr23:43294000-43296400/ENSBTAG00000048652	486	0.743017	.	255131131	chr23	43294000	43296400	chr23:43294000-43296400	.	chr23	43077484	43077485	ENSBTAG00000048652	.
DMR34	chr23	43077484	43411800	chr23:43410000-43411800/ENSBTAG00000048652	541	0.77065	.	255117117	chr23	43410000	43411800	chr23:43410000-43411800	.	chr23	43077484	43077485	ENSBTAG00000048652	.
DMR34	chr23	43077484	43414800	chr23:43414000-43414800/ENSBTAG00000048652	676	0.838197	.	255,82,82	chr23	43414000	43414800	chr23:43414000-43414800	.	chr23	43077484	43077485	ENSBTAG00000048652	.
DMR34	chr23	43077484	43612200	chr23:43611800-43612200/ENSBTAG00000048652	676	0.838197	.	255,82,82	chr23	43611800	43612200	chr23:43611800-43612200	.	chr23	43077484	43077485	ENSBTAG00000048652	.
DMR40	chr26	48056600	50671512	chr26:48056600-48056800/ENSBTAG00000011092	451	0.725712	.	255139139	chr26	48056600	48056800	chr26:48056600-48056800	.	chr26	50671512	50671513	ENSBTAG00000011092	.
DMR40	chr26	48293600	50822833	chr26:48293600-48300400/ENSBTAG00000019919	462	-0.731425	.	137137255	chr26	48293600	48300400	chr26:48293600-48300400	.	chr26	50822833	50822834	ENSBTAG00000019919	.
DMR40	chr26	48304400	50822833	chr26:48304400-48304800/ENSBTAG00000019919	546	-0.77322	.	115115255	chr26	48304400	48304800	chr26:48304400-48304800	.	chr26	50822833	50822834	ENSBTAG00000019919	.
DMR40	chr26	48404200	50671512	chr26:48404200-48404400/ENSBTAG00000011092	467	-0.733566	.	135135255	chr26	48404200	48404400	chr26:48404200-48404400	.	chr26	50671512	50671513	ENSBTAG00000011092	.
DMR40	chr26	48862200	50822833	chr26:48862200-48864400/ENSBTAG00000019919	474	-0.737396	.	134134255	chr26	48862200	48864400	chr26:48862200-48864400	.	chr26	50822833	50822834	ENSBTAG00000019919	.
DMR40	chr26	48862200	50934247	chr26:48862200-48864400/ENSBTAG00000054665	419	-0.709783	.	148148255	chr26	48862200	48864400	chr26:48862200-48864400	.	chr26	50934247	50934248	ENSBTAG00000054665	.
DMR40	chr26	49027200	50723720	chr26:49027200-49028000/ENSBTAG00000005965	421	0.710918	.	255147147	chr26	49027200	49028000	chr26:49027200-49028000	.	chr26	50723720	50723721	ENSBTAG00000005965	.
DMR40	chr26	49027200	50904505	chr26:49027200-49028000/ENSBTAG00000015651	517	0.758824	.	255123123	chr26	49027200	49028000	chr26:49027200-49028000	.	chr26	50904505	50904506	ENSBTAG00000015651	.
DMR40	chr26	49027200	50934247	chr26:49027200-49028000/ENSBTAG00000054665	477	0.738952	.	255133133	chr26	49027200	49028000	chr26:49027200-49028000	.	chr26	50934247	50934248	ENSBTAG00000054665	.
DMR40	chr26	49202600	51083088	chr26:49202600-49204400/ENSBTAG00000009181	470	0.735294	.	255135135	chr26	49202600	49204400	chr26:49202600-49204400	.	chr26	51083088	51083089	ENSBTAG00000009181	.
DMR40	chr26	49249800	51083088	chr26:49249800-49252400/ENSBTAG00000009181	441	0.720588	.	255142142	chr26	49249800	49252400	chr26:49249800-49252400	.	chr26	51083088	51083089	ENSBTAG00000009181	.
DMR40	chr26	49268000	51083088	chr26:49268000-49268200/ENSBTAG00000009181	570	0.785294	.	255109109	chr26	49268000	49268200	chr26:49268000-49268200	.	chr26	51083088	51083089	ENSBTAG00000009181	.
DMR40	chr26	49271953	49278000	chr26:49274600-49278000/ENSBTAG00000008272	623	0.811765	.	255,96,96	chr26	49274600	49278000	chr26:49274600-49278000	.	chr26	49271953	49271954	ENSBTAG00000008272	.
DMR40	chr26	49274600	51083088	chr26:49274600-49278000/ENSBTAG00000009181	564	0.782353	.	255111111	chr26	49274600	49278000	chr26:49274600-49278000	.	chr26	51083088	51083089	ENSBTAG00000009181	.
DMR38	chr26	23007200	23323218	chr26:23007200-23009200/ENSBTAG00000004321	658	-0.829412	.	87,87,255	chr26	23007200	23009200	chr26:23007200-23009200	.	chr26	23323218	23323219	ENSBTAG00000004321	.
DMR38	chr26	23031400	23323218	chr26:23031400-23034200/ENSBTAG00000004321	588	-0.794118	.	105105255	chr26	23031400	23034200	chr26:23031400-23034200	.	chr26	23323218	23323219	ENSBTAG00000004321	.
DMR38	chr26	23063800	23323218	chr26:23063800-23067200/ENSBTAG00000004321	617	-0.808824	.	97,97,255	chr26	23063800	23067200	chr26:23063800-23067200	.	chr26	23323218	23323219	ENSBTAG00000004321	.
DMR38	chr26	23092000	23323218	chr26:23092000-23092200/ENSBTAG00000004321	464	-0.732353	.	136136255	chr26	23092000	23092200	chr26:23092000-23092200	.	chr26	23323218	23323219	ENSBTAG00000004321	.
DMR38	chr26	23127200	23323218	chr26:23127200-23127800/ENSBTAG00000004321	558	-0.779412	.	112112255	chr26	23127200	23127800	chr26:23127200-23127800	.	chr26	23323218	23323219	ENSBTAG00000004321	.
DMR38	chr26	23195200	23323218	chr26:23195200-23196000/ENSBTAG00000004321	658	-0.829412	.	87,87,255	chr26	23195200	23196000	chr26:23195200-23196000	.	chr26	23323218	23323219	ENSBTAG00000004321	.
DMR4	chr3	107884600	108109056	chr3:107884600-107885600/ENSBTAG00000045776	782	0.891176	.	255,55,55	chr3	107884600	107885600	chr3:107884600-107885600	.	chr3	108109056	108109057	ENSBTAG00000045776	.
DMR4	chr3	107884600	108120963	chr3:107884600-107885600/ENSBTAG00000046989	776	0.888235	.	255,57,57	chr3	107884600	107885600	chr3:107884600-107885600	.	chr3	108120963	108120964	ENSBTAG00000046989	.
DMR4	chr3	107884600	108149712	chr3:107884600-107885600/ENSBTAG00000020510	479	0.739881	.	255132132	chr3	107884600	107885600	chr3:107884600-107885600	.	chr3	108149712	108149713	ENSBTAG00000020510	.
DMR4	chr3	107920577	108219400	chr3:108219000-108219400/ENSBTAG00000051564	528	0.76404	.	255120120	chr3	108219000	108219400	chr3:108219000-108219400	.	chr3	107920577	107920578	ENSBTAG00000051564	.
DMR8	chr5	103547189	103813800	chr5:103810200-103813800/ENSBTAG00000011274	570	0.785294	.	255109109	chr5	103810200	103813800	chr5:103810200-103813800	.	chr5	103547189	103547190	ENSBTAG00000011274	.
DMR8	chr5	103554354	103813800	chr5:103810200-103813800/ENSBTAG00000011273	437	0.718538	.	255143143	chr5	103810200	103813800	chr5:103810200-103813800	.	chr5	103554354	103554355	ENSBTAG00000011273	.
DMR9	chr5	109423829	109526000	chr5:109524200-109526000/ENSBTAG00000030258	564	-0.782353	.	111111255	chr5	109524200	109526000	chr5:109524200-109526000	.	chr5	109423829	109423830	ENSBTAG00000030258	.
DMR9	chr5	109472400	109484519	chr5:109472400-109474600/ENSBTAG00000030257	447	0.723529	.	255141141	chr5	109472400	109474600	chr5:109472400-109474600	.	chr5	109484519	109484520	ENSBTAG00000030257	.
DMR10	chr6	63348187	67241000	chr6:67240200-67241000/ENSBTAG00000000287	547	0.773529	.	255115115	chr6	67240200	67241000	chr6:67240200-67241000	.	chr6	63348187	63348188	ENSBTAG00000000287	.
DMR10	chr6	65611356	67241000	chr6:67240200-67241000/ENSBTAG00000017837	719	0.859797	.	255,71,71	chr6	67240200	67241000	chr6:67240200-67241000	.	chr6	65611356	65611357	ENSBTAG00000017837	.
DMR10	chr6	66702049	67779600	chr6:67778000-67779600/ENSBTAG00000009423	417	0.708824	.	255148148	chr6	67778000	67779600	chr6:67778000-67779600	.	chr6	66702049	66702050	ENSBTAG00000009423	.
DMR10	chr6	66750600	67172309	chr6:66750600-66758000/ENSBTAG00000004886	529	-0.76488	.	120120255	chr6	66750600	66758000	chr6:66750600-66758000	.	chr6	67172309	67172310	ENSBTAG00000004886	.
DMR10	chr6	66751400	67172309	chr6:66751400-66757000/ENSBTAG00000004886	458	-0.729229	.	138138255	chr6	66751400	66757000	chr6:66751400-66757000	.	chr6	67172309	67172310	ENSBTAG00000004886	.
DMR11	chr7	19074800	19257053	chr7:19074800-19076200/ENSBTAG00000002224	599	0.8	.	255102102	chr7	19074800	19076200	chr7:19074800-19076200	.	chr7	19257053	19257054	ENSBTAG00000002224	.
DMR12	chr9	15122800	19256542	chr9:15122800-15127000/ENSBTAG00000055014	741	-0.870588	.	66,66,255	chr9	15122800	15127000	chr9:15122800-15127000	.	chr9	19256542	19256543	ENSBTAG00000055014	.
DMR12	chr9	15140600	18706677	chr9:15140600-15141800/ENSBTAG00000049267	511	-0.755882	.	124124255	chr9	15140600	15141800	chr9:15140600-15141800	.	chr9	18706677	18706678	ENSBTAG00000049267	.
DMR12	chr9	15140600	19641142	chr9:15140600-15141800/ENSBTAG00000015498	482	-0.741176	.	132132255	chr9	15140600	15141800	chr9:15140600-15141800	.	chr9	19641142	19641143	ENSBTAG00000015498	.
DMR12	chr9	15414600	19702310	chr9:15414600-15417600/ENSBTAG00000005456	599	-0.8	.	102102255	chr9	15414600	15417600	chr9:15414600-15417600	.	chr9	19702310	19702311	ENSBTAG00000005456	.
DMR12	chr9	15437800	19702310	chr9:15437800-15443200/ENSBTAG00000005456	594	-0.797059	.	103103255	chr9	15437800	15443200	chr9:15437800-15443200	.	chr9	19702310	19702311	ENSBTAG00000005456	.
DMR12	chr9	15448000	19702310	chr9:15448000-15449400/ENSBTAG00000005456	564	-0.782353	.	111111255	chr9	15448000	15449400	chr9:15448000-15449400	.	chr9	19702310	19702311	ENSBTAG00000005456	.
DMR12	chr9	15461668	19713800	chr9:19713000-19713800/ENSBTAG00000016751	658	-0.829412	.	87,87,255	chr9	19713000	19713800	chr9:19713000-19713800	.	chr9	15461668	15461669	ENSBTAG00000016751	.
DMR12	chr9	17337602	18850400	chr9:18849000-18850400/ENSBTAG00000054151	445	-0.722717	.	141141255	chr9	18849000	18850400	chr9:18849000-18850400	.	chr9	17337602	17337603	ENSBTAG00000054151	.

## Sheet: Table S7
DNA methylation may affect beef tenderness through signal transduction in Bos indicus
Table S7. Functional enrichment results obtained from ClueGo. Over-represented biological processes (BP) annotations for the predicted target genes of differentially methylated CpGs (DMCs) and regions (DMRs). Significant ontology terms were identified at an estimated false discovery rate (FDR) < 0.05. Ontology terms that were closely related based on similar genes/ biological functions were group…
GOID	GOTerm	Ontology Source	Term PValue	Term PValue Corrected with Benjamini-Hochberg	Group PValue	Group PValue Corrected with Benjamini-Hochberg	GOLevels	GOGroups	% Associated Genes	Nr. Genes	Associated Genes Found
GO:0007189	adenylate cyclase-activating G protein-coupled receptor signaling pathway	GO_BiologicalProcess-EBI-UniProt-GOA_17.05.2021_00h00	0.00478588	0.0129902	0.00478588	0.0119647	[5, 6, 7]	Group00	4.03226	5	[ADGRB1, ADGRE3, ADGRE5, GNAS, PDE4B]
GO:0006910	phagocytosis, recognition	GO_BiologicalProcess-EBI-UniProt-GOA_17.05.2021_00h00	0.000414114	0.00393408	0.000414114	0.00414114	[3, 4, 6]	Group01	17.6471	3	[ADGRB1, FCN1, TUB]
GO:0035023	regulation of Rho protein signal transduction	GO_BiologicalProcess-EBI-UniProt-GOA_17.05.2021_00h00	0.0284248	0.0284248	0.0284248	0.0315831	[7, 8, 9]	Group02	4	3	[GPR18, ITGB1, NRP1]
GO:0072678	T cell migration	GO_BiologicalProcess-EBI-UniProt-GOA_17.05.2021_00h00	0.0102024	0.0129231	0.0102024	0.0145749	[5, 7, 8]	Group03	5.88235	3	[CCR6, GPR183, IL27RA]
GO:2000242	negative regulation of reproductive process	GO_BiologicalProcess-EBI-UniProt-GOA_17.05.2021_00h00	0.00814862	0.0119095	0.00814862	0.013581	[2, 3, 4]	Group04	6.38298	3	[GPR149, PTGDS, TTK]
GO:0004601	peroxidase activity	GO_BiologicalProcess-EBI-UniProt-GOA_17.05.2021_00h00	0.0102024	0.0129231	0.0102024	0.0145749	[5, 8]	Group05	5.88235	3	[GSTK1, LPO, MPO]
GO:0006636	unsaturated fatty acid biosynthetic process	GO_BiologicalProcess-EBI-UniProt-GOA_17.05.2021_00h00	0.00767722	0.0121556	0.00767722	0.0153544	[6, 7, 8, 9]	Group06	6.52174	3	[ELOVL4, PTGDS, PTGES2]
GO:0007272	ensheathment of neurons	GO_BiologicalProcess-EBI-UniProt-GOA_17.05.2021_00h00	0.00180956	0.00687633	0.00180956	0.00603187	[2, 5, 6]	Group07	5.05051	5	[CNTN2, KEL, KIF14, NFASC, QKI]
GO:0008366	axon ensheathment	GO_BiologicalProcess-EBI-UniProt-GOA_17.05.2021_00h00	0.00180956	0.00687633	0.00180956	0.00603187	[3, 6, 7]	Group07	5.05051	5	[CNTN2, KEL, KIF14, NFASC, QKI]
GO:0042552	myelination	GO_BiologicalProcess-EBI-UniProt-GOA_17.05.2021_00h00	0.00165344	0.00785385	0.00180956	0.00603187	[4, 7, 8]	Group07	5.15464	5	[CNTN2, KEL, KIF14, NFASC, QKI]
GO:0060760	positive regulation of response to cytokine stimulus	GO_BiologicalProcess-EBI-UniProt-GOA_17.05.2021_00h00	0.00722238	0.012475	0.0113459	0.0141824	[3, 4, 5, 6]	Group08	6.66667	3	[NLRC5, TRAF2, ZBP1]
GO:0001959	regulation of cytokine-mediated signaling pathway	GO_BiologicalProcess-EBI-UniProt-GOA_17.05.2021_00h00	0.00950421	0.0128986	0.0113459	0.0141824	[4, 5, 6, 7]	Group08	4.25532	4	[NLRC5, PALM3, TRAF2, ZBP1]
GO:0001961	positive regulation of cytokine-mediated signaling pathway	GO_BiologicalProcess-EBI-UniProt-GOA_17.05.2021_00h00	0.00519161	0.0123301	0.0113459	0.0141824	[4, 5, 6, 7, 8]	Group08	7.5	3	[NLRC5, TRAF2, ZBP1]
GO:0005242	inward rectifier potassium channel activity	GO_BiologicalProcess-EBI-UniProt-GOA_17.05.2021_00h00	3.71128e-05	0.000705143	0.00155326	0.00776629	[8, 9, 10, 11, 12, 13]	Group09	18.1818	4	[ITGB1, KCNJ12, KCNJ16, KCNJ2]
GO:1990573	potassium ion import across plasma membrane	GO_BiologicalProcess-EBI-UniProt-GOA_17.05.2021_00h00	0.00722238	0.012475	0.00155326	0.00776629	[6, 7, 8, 9]	Group09	6.66667	3	[KCNJ12, KCNJ16, KCNJ2]
GO:0022843	voltage-gated cation channel activity	GO_BiologicalProcess-EBI-UniProt-GOA_17.05.2021_00h00	0.000739646	0.00468442	0.00155326	0.00776629	[6, 7, 8, 9, 10, 11]	Group09	4.14201	7	[CACHD1, CACNA1A, ITGB1, KCNJ12, KCNJ16, KCNJ2, PDE4B]
GO:0005245	voltage-gated calcium channel activity	GO_BiologicalProcess-EBI-UniProt-GOA_17.05.2021_00h00	0.0158347	0.0176977	0.00155326	0.00776629	[7, 8, 9, 10, 11, 12]	Group09	5	3	[CACHD1, CACNA1A, PDE4B]
GO:0005249	voltage-gated potassium channel activity	GO_BiologicalProcess-EBI-UniProt-GOA_17.05.2021_00h00	0.00950421	0.0128986	0.00155326	0.00776629	[7, 8, 9, 10, 11, 12]	Group09	4.25532	4	[ITGB1, KCNJ12, KCNJ16, KCNJ2]
GO:0007200	phospholipase C-activating G protein-coupled receptor signaling pathway	GO_BiologicalProcess-EBI-UniProt-GOA_17.05.2021_00h00	0.0237797	0.0251008	0.0415071	0.0415071	[4, 5, 6]	Group10	4.28571	3	[C5AR2, CMKLR1, GPR18]
GO:0002686	negative regulation of leukocyte migration	GO_BiologicalProcess-EBI-UniProt-GOA_17.05.2021_00h00	0.00299816	0.00949417	0.0415071	0.0415071	[3, 4, 5, 6, 7, 8]	Group10	9.09091	3	[C5AR2, GPR18, IL27RA]
GO:0002688	regulation of leukocyte chemotaxis	GO_BiologicalProcess-EBI-UniProt-GOA_17.05.2021_00h00	0.0117398	0.013941	0.0415071	0.0415071	[4, 5, 6, 7, 8]	Group10	4	4	[C5AR2, CCR6, CMKLR1, GPR18]
GO:1903556	negative regulation of tumor necrosis factor superfamily cytokine production	GO_BiologicalProcess-EBI-UniProt-GOA_17.05.2021_00h00	0.00636186	0.0120875	0.0415071	0.0415071	[4, 5, 6, 7, 8]	Group10	6.97674	3	[C5AR2, GPR18, IL27RA]
GO:0032720	negative regulation of tumor necrosis factor production	GO_BiologicalProcess-EBI-UniProt-GOA_17.05.2021_00h00	0.00595587	0.0125735	0.0415071	0.0415071	[5, 6, 7, 8, 9]	Group10	7.14286	3	[C5AR2, GPR18, IL27RA]

## Sheet: Table S8
DNA methylation may affect beef tenderness through signal transduction in Bos indicus
Table S8. List of DMCs, DMRs and genes used for testing correlation between methylation level and expression. DMCs and DMRs were included in the list due to one or more of the three reasons: overlapping quantitative Trait Loci (QTL; obtained from our population or from the bovie QTL Database); due to its predicted target genes being enriched in our functional analysis or having known function on …
DMC	Gene	Reason	Gene interaction type
DMC29	ADGRB1	enriched in fucntional analysis	Target gene
DMC114	ADGRE5	enriched in fucntional analysis	Target gene
DMC48	C5AR2	enriched in fucntional analysis	Target/closest gene
DMC98	CACHD1	enriched in fucntional analysis	Target gene
DMC114	CACNA1A	enriched in fucntional analysis	Target gene
DMC119	CCR6	enriched in fucntional analysis	Target gene
DMC43	CMKLR1	enriched in fucntional analysis	Target gene
DMC118	ELOVL4	enriched in fucntional analysis	Target gene
DMC18	FCN1	enriched in fucntional analysis	Target gene
DMC23	GNAS	enriched in fucntional analysis	Target/closest gene
DMC24	GNAS	enriched in fucntional analysis	Target gene
DMC103	GSTK1	enriched in fucntional analysis	Target gene
DMC114	IL27RA	enriched in fucntional analysis	Target gene
DMC57	KCNJ12	enriched in fucntional analysis	Target/closest gene
DMC61	KCNJ2	enriched in fucntional analysis	Target gene
DMC39	KIF14	enriched in fucntional analysis	Target gene
DMC37	NFASC	enriched in fucntional analysis	Target/closest gene
DMC46	NLRC5	enriched in fucntional analysis	Target/closest gene
DMC98	PDE4B	enriched in fucntional analysis	Target gene
DMC13	PTGDS	enriched in fucntional analysis	Target gene
DMC15	PTGES2	enriched in fucntional analysis	Target gene
DMC119	QKI	enriched in fucntional analysis	Target gene
DMC13	TRAF2	enriched in fucntional analysis	Target gene
DMC36	TUB	enriched in fucntional analysis	Target gene
DMC23	ZBP1	enriched in fucntional analysis	Target gene
DMC24	ZBP1	enriched in fucntional analysis	Target gene
DMC25	ZBP1	enriched in fucntional analysis	Target gene
DMC118	MYO6	literature(muscle-function)	Target gene
DMC87	EBF3	literature(muscle-function)/Regulatory-element/position	Target gene
DMC88	EBF3	literature(muscle-function)/Regulatory-element/position	Target/closest gene
DMC89	EBF3	literature(muscle-function)/Regulatory-element/position	Target/closest gene
DMC90	EBF3	literature(muscle-function)/Regulatory-element/position	Target/closest gene
DMC8	PLCL2	Shear force	Closest gene
DMC83	SLC5A2	Shear force	Closest gene
DMC40	ARL8A	WBSF0; WBSF7	Target gene
DMC41	ARL8A	WBSF0; WBSF7	Target gene
DMC40	LGR6	WBSF0; WBSF7	Target gene
DMC41	LGR6	WBSF0; WBSF7	Target/closest gene
DMC40	PPP1R12B	WBSF0; WBSF7	Target gene
DMC41	PPP1R12B	WBSF0; WBSF7	Target gene
DMC40	PTPN7	WBSF0; WBSF7	Target gene
DMC41	PTPN7	WBSF0; WBSF7	Target gene
DMC40	SYT2	WBSF0; WBSF7	Closest gene
DMC40	TMEM9	WBSF0; WBSF7	Target gene
DMC11	ANKRD53	WBSF7	Closest gene
DMC12	EPCAM	WBSF7	Target gene
DMC11	NAGK	WBSF7	Target gene
DMC12	STPG4	WBSF7	Closest gene
DMC12	TTC7A	WBSF7	Target gene
DMC22	ITGB1	WBSF7/enriched	Target gene
DMC75	ITGB1	WBSF7/enriched	Target gene
DMC22	NRP1	WBSF7/enriched	Target/closest gene
DMR	GENE	REASON	Gene interaction type
DMR12	ELOVL4	enriched in fucntional analysis	Target gene
DMR12	MYO6	literature(muscle-function)	Target gene
DMR16	FCN1	enriched in fucntional analysis	Target gene
DMR17	GPR183	enriched in fucntional analysis	Target gene
DMR18	ITGB1	WBSF7/enriched	Target gene
DMR18	NRP1	WBSF7/enriched	Target/closest gene
DMR20	GNAS	enriched in fucntional analysis	Target/closest gene
DMR20	ZBP1	enriched in fucntional analysis	Target gene
DMR21	GNAS	enriched in fucntional analysis	Target gene
DMR21	ZBP1	enriched in fucntional analysis	Target gene
DMR25	KIF14	enriched in fucntional analysis	Target gene
DMR29	KCNJ2	enriched in fucntional analysis	Target gene
DMR40	EBF3	literature(muscle-function)/Regulatory-element/position	Target/closest gene

## Sheet: Table S9
DNA methylation may affect beef tenderness through signal transduction in Bos indicus
Table S9. RNA-Sequencing mapping statistics of 11 samples with extreme estimated breeding value (EBV) shear force values at 7 days of aging.
	H01	H02	H03	H04	H05	H06	L07	L08	L09	L10	L11
Mappingspeed,Millionofreadsperhour	232.39	218.70	243.38	238.71	244.35	239.86	317.63	317.52	329.44	242.81	244.92
Number of input reads	6971593	6378852	8923783	8686330	8145024	9128137	8028928	10231355	18393951	10994040	8708203
Averageinputreadlength	191	191	187	191	188	187	149	149	149	187	187
Uniquely mapped reads number	6671962	6120681	8574968	8362961	7752010	8820379	7654164	9829460	17684837	10586677	8354634
Uniquely mapped reads%	0.957	0.9595	0.9609	0.9628	0.9517	0.9663	0.9533	0.9607	0.9614	0.9629	0.9594
Averagemappedlength	190.56	191.27	185.75	191.30	187.43	186.40	149.20	149.20	149.19	186.10	186.10
Numberofsplices:Total	4864234	4534710	5790985	5817589	5175793	5745132	4513436	5491747	9607603	7398558	6035527
Numberofsplices:Annotated(sjdb)	4644190	4307923	5508616	5538384	4924707	5469120	4316625	5246221	9175281	7049236	5752955
Numberofsplices:GT/AG	4828050	4500523	5746315	5776670	5136982	5701158	4480622	5452948	9539464	7343382	5989294
Numberofsplices:GC/AG	28886	27367	35842	32821	30317	35950	26364	30959	55369	44661	37407
Numberofsplices:AT/AC	1890	1790	2304	2434	2318	2216	1815	2224	3572	3060	2432
Numberofsplices:Non-canonical	5408	5030	6524	5664	6176	5808	4635	5616	9198	7455	6394
Mismatchrateperbase,%	0.21%	0.22%	0.23%	0.21%	0.24%	0.22%	0.21%	0.22%	0.22%	0.22%	0.22%
Deletionrateperbase	0.01%	0.01%	0.01%	0.01%	0.01%	0.01%	0.01%	0.01%	0.01%	0.01%	0.01%
Deletionaveragelength	2.09	2.01	1.95	1.95	1.96	1.98	1.87	1.95	1.93	1.95	2.08
Insertionrateperbase	0.01%	0.01%	0.01%	0.01%	0.01%	0.01%	0.01%	0.01%	0.01%	0.01%	0.01%
Insertionaveragelength	1.61	1.62	1.66	1.66	1.46	1.68	1.48	1.55	1.54	1.66	1.70
Number of reads mapped to multiple loci	152324	140761	197042	169278	171330	181415	208481	245387	422851	234485	191155
%ofreadsmappedtomultipleloci	2.18%	2.21%	2.21%	1.95%	2.10%	1.99%	2.60%	2.40%	2.30%	2.13%	2.20%
Number of reads mapped to too many loci	17298	12712	16922	17980	5297	8479	20702	10166	15781	13253	11168
%ofreadsmappedtotoomanyloci	0.25%	0.20%	0.19%	0.21%	0.07%	0.09%	0.26%	0.10%	0.09%	0.12%	0.13%
%ofreadsunmapped:toomanymismatches	0.00%	0.00%	0.00%	0.00%	0.00%	0.00%	0.00%	0.00%	0.00%	0.00%	0.00%
%ofreadsunmapped:tooshort	1.68%	1.50%	1.43%	1.41%	2.60%	1.25%	1.61%	1.36%	1.41%	1.40%	1.67%
%ofreadsunmapped:other	0.19%	0.14%	0.09%	0.16%	0.06%	0.04%	0.20%	0.07%	0.06%	0.05%	0.06%
Numberofchimericreads	0	0	0	0	0	0	0	0	0	0	0
%ofchimericreads	0.00%	0.00%	0.00%	0.00%	0.00%	0.00%	0.00%	0.00%	0.00%	0.00%	0.00%

## Sheet: Table S10
DNA methylation may affect beef tenderness through signal transduction in Bos indicus
Table S10. Element regulatory state by tissue for each selected DMC or DMR.
Tissue	DMC12	DMC98	DMC23	DMC89	DMC90	DMR40
Muscle	(11) ATAC island	(15) Quiescent	(12) Bivalent/poised TSS	(1) Strongly active promoter/transcript	(1) Strongly active promoter/transcript	(1) Strongly active promoter/transcript
Adipose	(7) Medium enhancer with ATAC	(15) Quiescent	(1) Strongly active promoter/transcript	(12) Bivalent/poised TSS	(12) Bivalent/poised TSS	(12) Bivalent/poised TSS
Abomasum	(11) ATAC island	(15) Quiescent	(1) Strongly active promoter/transcript	(13) Repressed polycomb	(13) Repressed polycomb	(13) Repressed polycomb
Cecum	(11) ATAC island	(15) Quiescent	(3) Transcribed at gene	(13) Repressed polycomb	(13) Repressed polycomb	(13) Repressed polycomb
Cerebellum	(12) Bivalent/poised TSS	(15) Quiescent	(2) Flanking active TSS withouth ATAC	(5) Transcribed region without ATAC	(5) Transcribed region without ATAC	(5) Transcribed region without ATAC
Colon	(8) Weak active enhancer	(15) Quiescent	(3) Transcribed at gene	(12) Bivalent/poised TSS	(12) Bivalent/poised TSS	(12) Bivalent/poised TSS
Cortex	(15) Quiescent	(15) Quiescent	(2) Flanking active TSS withouth ATAC	(13) Repressed polycomb	(13) Repressed polycomb	(13) Repressed polycomb
Duodenum	(15) Quiescent	(15) Quiescent	(1) Strongly active promoter/transcript	(13) Repressed polycomb	(13) Repressed polycomb	(13) Repressed polycomb
Hypothalamus	(11) ATAC island	(15) Quiescent	(2) Flanking active TSS withouth ATAC	(12) Bivalent/poised TSS	(12) Bivalent/poised TSS	(12) Bivalent/poised TSS
Ileum	(15) Quiescent	(15) Quiescent	(1) Strongly active promoter/transcript	(12) Bivalent/poised TSS	(12) Bivalent/poised TSS	(12) Bivalent/poised TSS
Jejunum	(13) Repressed polycomb	(15) Quiescent	(1) Strongly active promoter/transcript	(13) Repressed polycomb	(13) Repressed polycomb	(13) Repressed polycomb
Liver	(15) Quiescent	(15) Quiescent	(3) Transcribed at gene	(13) Repressed polycomb	(13) Repressed polycomb	(13) Repressed polycomb
Lung	(6) Strong active enhancer	(15) Quiescent	(3) Transcribed at gene	(12) Bivalent/poised TSS	(12) Bivalent/poised TSS	(12) Bivalent/poised TSS
Rumen	(11) ATAC island	(14) Weak repressed polycomb	(1) Strongly active promoter/transcript	(12) Bivalent/poised TSS	(12) Bivalent/poised TSS	(12) Bivalent/poised TSS
Spleen	(11) ATAC island	(15) Quiescent	(1) Strongly active promoter/transcript	(12) Bivalent/poised TSS	(12) Bivalent/poised TSS	(12) Bivalent/poised TSS
